# Supplementary material for: Kinematic gait characteristics of straight line walk in clinically sound dairy cows
Source: PLoS One. 2021 Jul 21;16(7):e0253479. doi: 10.1371/journal.pone.0253479 (PMC8294546; doi:10.1371/journal.pone.0253479)
Supplement: S1 File — Excel file with stance duration, speed normalized stance duration, bipedal and tripedal support durations, speed normalized bipedal and tripedal support durations, maximal protraction and retraction angles of the distal limbs and cows. (XLS) [file pone.0253479.s009.xls]

## Sheet: temporal parameters
cow_nr	limb	stance	stride_LH	rel_stance	pro	re
1	LH	0.84	1.28	0.65625
1	LH	0.86	1.305	0.659004	-23.7302	18.7694
1	LH	0.95	1.41	0.673759	-23.2804	24.0772
1	LH	0.825	1.3	0.634615	-28.7124	18.6275
1	LH	0.995	1.44	0.690972	-23.9854	23.0552
1	LH	0.76	1.28	0.59375	-27.0045	18.6065
1	LH	0.88	1.35	0.651852	-25.4498	23.404
1	LH	1.005	1.52	0.661184	-25.1136	22.1559
1	LH	0.64	1.23	0.520325	-22.2933	23.1224
1	LH	0.755	1.2	0.629167	-27.7103	23.095
1	LH	0.74	1.22	0.606557	-27.0371	24.0287
1	LH	1.015	1.47	0.690476	-24.4879	26.5605
1	LH	0.735	1.24	0.592742	-29.1282	17.1816
1	LH	0.845	1.35	0.625926	-25.2161	23.7438
1	LH	0.92	1.445	0.636678	-22.2155	27.5997
1	LH	0.785	1.3	0.603846	-28.5984	19.4939
1	LH	1	1.49	0.671141	-23.2825	22.8399
1	LH	0.935	1.445	0.647059	-30.2208	21.4921
1	LH	0.845	1.315	0.642586	-26.183	22.3467
1	LH	0.95	1.355	0.701107	-27.9804	18.8723
1	LH	1.05	1.465	0.716724	-28.0424	16.9872
1	LH	1.01	1.425	0.708772	-29.0123	16.1723
1	LH	0.78	1.305	0.597701	-26.3141	19.7914
1	LH	0.67	1.165	0.575107	-26.5216	21.4997
1	LH	0.965	1.37	0.70438	-25.2412	22.4216
1	LH	0.845	1.37	0.616788	-27.4979	22.0057
1	LH	0.74	1.27	0.582677	-24.89	23.4095
1	LH	0.83	1.355	0.612546	-25.6951	21.9753
1	LH	0.95	1.495	0.635452	-24.5765	22.7746
1	LH				-22.0613	10.6773
1	LH	0.955	1.415	0.674912
1	LH	0.955	1.465	0.651877	-20.4474	26.0801
1	LH	0.81	1.265	0.640316	-23.6301	24.4053
1	LH	0.9	1.3	0.692308	-24.4898	17.2298
1	LH	0.75	1.195	0.627615	-26.3127	18.8515
1	LH	0.77	1.21	0.636364	-23.5293	21.2444
1	LH	0.865	1.23	0.703252	-28.3144	15.5398
1	LH	0.7	1.13	0.619469	-29.6371	18.0313
1	LH	0.75	1.15	0.652174	-23.2863	17.9009
1	LH	0.825	1.245	0.662651	-21.7486	21.012
1	LH	0.94	1.36	0.691176	-25.7377	18.5727
1	LH	1.1	1.55	0.709677	-24.4387	19.7758
1	LH	1.065	1.645	0.647416	-26.4802	19.1864
1	LH	0.975	1.64	0.594512	-22.4737	22.249
1	LH	1.02	1.545	0.660194	-25.1972	17.5855
1	LH	0.885	1.475	0.6	-22.6592	23.1403
1	LH	0.88	1.385	0.635379	-24.0966	20.2202
1	LH	0.87	1.43	0.608392	-24.607	22.8236
1	LH	0.855	1.41	0.606383	-23.429	23.8902
1	LH	0.81	1.35	0.6	-24.9387	21.5582
1	LH	0.8	1.315	0.608365	-25.3278	22.6202
1	LH	0.865	1.365	0.6337	-25.3137	22.8422
1	LH	0.885	1.425	0.621053	-24.7865	25.029
1	LH	1.085	1.675	0.647761	-24.1313	22.392
1	LH				-20.5705	22.9959
1	LH	1.205	1.255	0.960159
1	LH	0.68	1.09	0.623853	-17.6083	18.3424
1	LH	0.705	1.13	0.623894	-22.3007	26.3764
1	LH	0.725	1.175	0.617021	-25.4217	27.0523
1	LH	0.68	1.15	0.591304	-25.2955	25.7124
1	LH	0.72	1.16	0.62069	-25.9475	23.747
1	LH	0.745	1.2	0.620833	-25.3201	23.661
1	LH	0.75	1.23	0.609756	-24.1478	24.8615
1	LH	0.79	1.26	0.626984	-24.3522	23.0585
1	LH	0.71	1.2	0.591667	-24.298	24.3412
1	LH	0.71	1.19	0.596639	-25.1402	23.8267
1	LH	0.745	1.215	0.613169	-26.3028	22.4391
1	LH	0.795	1.265	0.628458	-24.6274	24.2224
1	LH	0.735	1.235	0.595142	-24.3819	22.6729
1	LH	0.66	1.185	0.556962	-26.2405	22.337
1	LH	1.025	1.445	0.709343	-23.3537	23.4317
1	LH	0.545	1.09	0.5	-25.8547	15.6073
1	LH	0.9	1.27	0.708661	-21.1689	21.3387
1	LH	0.8	1.26	0.634921	-27.258	17.7562
1	LH	0.695	1.16	0.599138	-25.2802	19.803
1	LH	0.75	1.195	0.627615	-24.3849	19.1278
1	LH	0.775	1.235	0.62753	-23.6105	20.467
1	LH	0.79	1.255	0.629482	-23.9326	22.185
1	LH	0.74	1.245	0.594378	-23.0993	22.5146
1	LH	0.735	1.225	0.6	-24.9187	21.3964
1	LH	0.73	1.215	0.600823	-24.4796	22.7457
1	LH	0.835	1.32	0.632576	-24.217	23.6183
1	LH	1.5	2.035	0.737101	-23.4677	22.5997
1	LH	0.22	1.35	0.162963	-15.4535	19.2451
1	LH	1.005	1.43	0.702797	-21.8984	24.3394
1	LH	1.085	1.59	0.68239	-28.1023	17.9546
1	LH	0.97	1.605	0.604361	-22.0628	27.321
1	LH	0.705	1.25	0.564	-26.3868	18.9552
1	LH	1.105	1.57	0.703822	-23.3222	24.1294
1	LH	0.785	1.37	0.572993	-27.4485	18.7081
1	LH	0.745	1.275	0.584314	-24.9257	22.2773
1	LH	0.815	1.325	0.615094	-25.3402	22.6542
1	LH	0.815	1.345	0.605948	-24.1752	21.0319
1	LH	0.715	1.26	0.56746	-23.5748	24.475
1	LH	0.89	1.325	0.671698	-24.1049	23.324
1	LH	0.66	1.135	0.581498	-29.5078	17.839
1	LH				-26.5613	20.5221
1	RH	0.895	1.28	0.699219
1	RH	0.9	1.305	0.689655	-24.298	23.1243
1	RH	0.655	1.41	0.464539	-24.9677	21.5494
1	RH	1.07	1.3	0.823077	-23.7005	24.4955
1	RH	0.82	1.44	0.569444	-27.9224	19.989
1	RH	0.77	1.28	0.601562	-25.1677	24.0257
1	RH	0.86	1.35	0.637037	-24.3775	24.5895
1	RH	0.825	1.52	0.542763	-22.7541	27.9636
1	RH	0.68	1.23	0.552846	-27.2266	22.0777
1	RH	0.74	1.2	0.616667	-25.6772	25.5474
1	RH	0.915	1.22	0.75	-24.7236	27.3518
1	RH	0.675	1.47	0.459184	-25.41	26.2598
1	RH	0.68	1.24	0.548387	-24.0292	23.3335
1	RH	1.195	1.35	0.885185	-24.9476	23.8605
1	RH	0.795	1.445	0.550173	-28.6923	22.8077
1	RH	0.895	1.3	0.688462	-24.5215	25.2233
1	RH	0.755	1.49	0.506711	-26.8693	25.4881
1	RH	0.9	1.445	0.622837	-28.1586	25.6927
1	RH	0.885	1.315	0.673004	-36.2029	23.6444
1	RH	1.01	1.355	0.745387	-33.8248	20.6789
1	RH	0.76	1.465	0.518771	-39.8808	27.5617
1	RH	1.025	1.425	0.719298	-23.6219	20.7648
1	RH	0.76	1.305	0.582375	-28.083	22.2122
1	RH	0.755	1.165	0.648069	-26.4378	21.5708
1	RH	0.775	1.37	0.565693	-25.1396	23.2791
1	RH	0.95	1.37	0.693431	-23.308	25.2909
1	RH	0.84	1.27	0.661417	-31.4544	18.6022
1	RH	0.915	1.355	0.675277	-25.3149	24.4653
1	RH		1.495		-24.4904	27.394
1	RH
1	RH	1.065	1.415	0.75265	-22.1991	27.3536
1	RH	0.945	1.465	0.645051	-23.1786	19.9974
1	RH	0.75	1.265	0.592885	-26.1308	19.7635
1	RH	0.77	1.3	0.592308	-23.8851	20.0289
1	RH	0.845	1.195	0.707113	-24.3311	21.9698
1	RH	0.645	1.21	0.533058	-25.4121	20.6716
1	RH	0.835	1.23	0.678862	-27.3703	21.8451
1	RH	0.78	1.13	0.690265	-26.2548	15.1968
1	RH	0.88	1.15	0.765217	-25.7662	18.1093
1	RH	0.915	1.245	0.73494	-26.5562	17.8035
1	RH	1.02	1.36	0.75	-24.9915	20.9962
1	RH	1.075	1.55	0.693548	-24.9282	21.7511
1	RH	1.22	1.645	0.741641	-25.0272	21.3623
1	RH	0.985	1.64	0.60061	-23.4407	18.0618
1	RH	1.265	1.545	0.81877	-26.508	15.282
1	RH	0.77	1.475	0.522034	-25.4854	21.1508
1	RH	0.895	1.385	0.646209	-23.7242	22.7796
1	RH	0.79	1.43	0.552448	-24.2401	22.5458
1	RH	0.88	1.41	0.624113	-24.843	23.5777
1	RH	1.01	1.35	0.748148	-29.2064	18.2421
1	RH	0.785	1.315	0.596958	-29.6261	18.8134
1	RH	0.83	1.365	0.608059	-24.1313	25.3552
1	RH	0.875	1.425	0.614035	-23.98	25.4779
1	RH		1.675		-21.9321	21.0346
1	RH
1	RH	0.94	1.255	0.749004
1	RH	0.75	1.09	0.688073	-21.75	21.7738
1	RH	0.69	1.13	0.610619	-26.9596	22.5956
1	RH	0.695	1.175	0.591489	-26.0717	24.9137
1	RH	0.685	1.15	0.595652	-25.189	25.7759
1	RH	0.67	1.16	0.577586	-26.0828	25.1547
1	RH	0.78	1.2	0.65	-24.323	25.5012
1	RH	0.735	1.23	0.597561	-26.1352	23.3922
1	RH	0.695	1.26	0.551587	-24.9592	24.2231
1	RH	0.75	1.2	0.625	-26.4777	23.4017
1	RH	0.695	1.19	0.584034	-26.6194	24.3899
1	RH	0.745	1.215	0.613169	-25.7869	23.0308
1	RH	0.665	1.265	0.525692	-24.1542	24.3505
1	RH	0.835	1.235	0.676113	-26.1702	24.536
1	RH	0.99	1.185	0.835443	-29.9551	21.5451
1	RH	0.84	1.445	0.581315	-28.0413	18.5772
1	RH	0.805	1.09	0.738532	-27.1303	16.2249
1	RH	0.74	1.27	0.582677	-25.7622	21.707
1	RH	0.68	1.26	0.539683	-22.6703	23.1401
1	RH	0.765	1.16	0.659483	-24.9502	22.071
1	RH	0.78	1.195	0.65272	-24.6552	21.309
1	RH	0.765	1.235	0.619433	-23.875	21.6937
1	RH	0.8	1.255	0.63745	-25.0726	20.8321
1	RH	0.76	1.245	0.610442	-24.1819	23.4229
1	RH	0.725	1.225	0.591837	-25.5052	21.4363
1	RH	0.78	1.215	0.641975	-25.2581	23.5171
1	RH	0.84	1.32	0.636364	-24.3947	24.7723
1	RH	1.615	2.035	0.793612	-23.2083	20.5424
1	RH	0.895	1.35	0.662963	-20.252	14.7089
1	RH	0.8	1.43	0.559441	-23.2895	25.7908
1	RH	1.15	1.59	0.72327	-22.2826	28.5844
1	RH	0.675	1.605	0.420561	-23.0549	24.986
1	RH	0.94	1.25	0.752	-25.7381	20.6503
1	RH	0.89	1.57	0.566879	-25.2054	23.247
1	RH	0.755	1.37	0.551095	-25.1891	23.7445
1	RH	0.785	1.275	0.615686	-25.3171	23.3495
1	RH	0.79	1.325	0.596226	-24.2964	25.8747
1	RH	0.855	1.345	0.635688	-23.9616	24.2361
1	RH	0.76	1.26	0.603175	-25.3697	22.5991
1	RH	0.67	1.325	0.50566	-25.4545	24.6322
1	RH		1.135		-26.5786	23.7089
1	RH
1	RF	0.97	1.28	0.757812	-45.1928	24.0195
1	RF	0.905	1.305	0.693487	-46.4126	21.8353
1	RF	0.935	1.41	0.663121	-44.6615	25.0355
1	RF	0.915	1.3	0.703846	-46.1238	22.7499
1	RF	0.9	1.44	0.625	-42.3419	23.9867
1	RF	0.87	1.28	0.679687	-43.6805	25.2314
1	RF	1.065	1.35	0.788889	-39.7286	24.7639
1	RF	0.825	1.52	0.542763	-42.1141	25.4492
1	RF	0.83	1.23	0.674797	-44.3439	26.9293
1	RF	0.83	1.2	0.691667	-46.6872	21.0932
1	RF	0.865	1.22	0.709016	-43.8445	24.0846
1	RF	0.805	1.47	0.547619	-44.2177	23.0833
1	RF	0.92	1.24	0.741935	-44.6224	24.395
1	RF	0.975	1.35	0.722222	-43.5947	23.118
1	RF	0.93	1.445	0.643599	-41.4868	25.3395
1	RF	0.91	1.3	0.7	-43.4276	22.1241
1	RF	1.025	1.49	0.687919	-47.618	26.6331
1	RF	0.92	1.445	0.636678	-53.5682	21.2399
1	RF	0.97	1.315	0.737643	-54.6968	22.6641
1	RF	1.035	1.355	0.763838	-43.7752	21.959
1	RF	0.875	1.465	0.59727	-52.2335	22.56
1	RF	0.955	1.425	0.670175	-42.1058	24.6523
1	RF	0.81	1.305	0.62069	-47.3466	25.2788
1	RF	0.865	1.165	0.742489	-45.4397	23.6797
1	RF	0.95	1.37	0.693431	-46.7412	21.8454
1	RF	0.9	1.37	0.656934	-44.4011	22.5764
1	RF	0.91	1.27	0.716535	-48.3547	23.9567
1	RF	1.005	1.355	0.741697	-45.2484	21.7022
1	RF		1.495		-45.2115	24.2974
1	RF
1	RF	1.23	1.415	0.869258	-41.1985	14.8739
1	RF	0.895	1.465	0.610922	-47.4356	19.8726
1	RF	0.86	1.265	0.679842	-45.6386	22.2269
1	RF	0.91	1.3	0.7	-42.0472	19.9997
1	RF	0.86	1.195	0.719665	-47.9951	20.0076
1	RF	0.765	1.21	0.632231	-45.8462	19.0593
1	RF	0.79	1.23	0.642276	-42.1178	15.1999
1	RF	0.795	1.13	0.70354	-40.03	18.4463
1	RF	0.88	1.15	0.765217	-46.6953	18.821
1	RF	0.92	1.245	0.738956	-48.9951	18.5876
1	RF	1.06	1.36	0.779412	-47.4189	21.2999
1	RF	1.13	1.55	0.729032	-42.9834	23.4007
1	RF	1.25	1.645	0.759878	-40.3367	19.0376
1	RF	1.015	1.64	0.618902	-39.2727	19.3324
1	RF	1.19	1.545	0.770227	-50.1245	22.8496
1	RF	1.03	1.475	0.698305	-47.2135	19.2396
1	RF	1	1.385	0.722022	-51.7584	23.0374
1	RF	0.95	1.43	0.664336	-47.4073	23.3765
1	RF	0.92	1.41	0.652482	-49.6264	22.6496
1	RF	0.875	1.35	0.648148	-44.6813	23.3602
1	RF	0.89	1.315	0.676806	-50.7642	23.6844
1	RF	0.945	1.365	0.692308	-44.369	22.4107
1	RF	1.125	1.425	0.789474	-41.9185	23.804
1	RF		1.675		-42.687	21.2434
1	RF
1	RF	0.89	1.255	0.709163
1	RF	0.78	1.09	0.715596	-42.7577	26.7136
1	RF	0.72	1.13	0.637168	-45.1121	24.3616
1	RF	0.82	1.175	0.697872	-44.4371	23.6723
1	RF	0.71	1.15	0.617391	-45.055	21.3192
1	RF	0.8	1.16	0.689655	-44.0181	23.9607
1	RF	0.84	1.2	0.7	-44.3449	22.1799
1	RF	0.825	1.23	0.670732	-42.1518	22.1356
1	RF	0.8	1.26	0.634921	-42.2161	22.3291
1	RF	0.805	1.2	0.670833	-45.1725	24.4499
1	RF	0.82	1.19	0.689076	-43.6226	23.5985
1	RF	0.85	1.215	0.699588	-43.5144	21.9409
1	RF	0.78	1.265	0.616601	-41.6687	22.5121
1	RF	0.945	1.235	0.765182	-47.9892	21.7975
1	RF	0.9	1.185	0.759494	-46.3906	15.7714
1	RF	0.85	1.445	0.588235	-40.5971	17.142
1	RF	0.79	1.09	0.724771	-41.2449	23.4683
1	RF	0.915	1.27	0.720472	-42.0997	21.9816
1	RF	0.785	1.26	0.623016	-42.6769	17.777
1	RF	0.78	1.16	0.672414	-47.0719	21.3726
1	RF	0.86	1.195	0.719665	-47.7892	19.7001
1	RF	0.82	1.235	0.663968	-44.8666	19.4573
1	RF	0.84	1.255	0.669323	-44.06	22.6778
1	RF	0.85	1.245	0.682731	-43.8673	20.9304
1	RF	0.815	1.225	0.665306	-44.5259	20.7634
1	RF	0.85	1.215	0.699588	-45.3104	21.9054
1	RF	0.98	1.32	0.742424	-40.9954	21.342
1	RF	1.435	2.035	0.70516	-36.8101	8.70534
1	RF	0.955	1.35	0.707407	-28.9314	26.0505
1	RF	1.1	1.43	0.769231	-43.7075	23.3423
1	RF	1.075	1.59	0.676101	-43.3522	23.3228
1	RF	0.94	1.605	0.58567	-40.4406	20.6554
1	RF	1.01	1.25	0.808	-44.3004	24.0204
1	RF	0.98	1.57	0.624204	-46.1339	22.3659
1	RF	0.87	1.37	0.635036	-45.4429	24.5098
1	RF	0.85	1.275	0.666667	-44.2871	23.8564
1	RF	0.975	1.325	0.735849	-42.0003	22.1585
1	RF	0.94	1.345	0.698885	-42.6669	23.4638
1	RF	0.845	1.26	0.670635	-41.7909	23.7874
1	RF	0.755	1.325	0.569811	-44.1203	22.498
1	RF		1.135		-46.4572	23.5183
1	RF
1	LF	0.98	1.28	0.765625
1	LF	0.995	1.305	0.762452	-48.9159	22.9475
1	LF	0.945	1.41	0.670213	-49.5396	19.5236
1	LF	1.055	1.3	0.811538	-51.4588	21.541
1	LF	0.965	1.44	0.670139	-45.897	21.7021
1	LF	0.875	1.28	0.683594	-45.045	22.436
1	LF	0.95	1.35	0.703704	-53.6643	23.3249
1	LF	1.045	1.52	0.6875	-44.1097	21.5295
1	LF	0.81	1.23	0.658537	-46.2265	25.3872
1	LF	0.805	1.2	0.670833	-49.8015	22.9437
1	LF	1.03	1.22	0.844262	-53.3419	25.9812
1	LF	0.815	1.47	0.554422	-42.9679	17.475
1	LF	0.83	1.24	0.669355	-46.7332	25.8602
1	LF	0.995	1.35	0.737037	-43.3713	22.9428
1	LF	0.915	1.445	0.633218	-48.1615	23.5403
1	LF	1.115	1.3	0.857692	-44.1221	23.7681
1	LF	0.935	1.49	0.627517	-46.5318	22.8495
1	LF	0.97	1.445	0.67128	-43.733	22.5494
1	LF	0.845	1.315	0.642586	-45.1687	20.7929
1	LF	1.155	1.355	0.852399	-52.7355	17.0697
1	LF	0.765	1.465	0.522184	-54.0725	16.7856
1	LF	0.895	1.425	0.62807	-49.5659	23.5894
1	LF	0.98	1.305	0.750958	-48.241	22.6112
1	LF	0.84	1.165	0.72103	-51.6367	20.5242
1	LF	0.86	1.37	0.627737	-46.0573	23.5601
1	LF	0.82	1.37	0.59854	-45.1693	19.7021
1	LF	0.81	1.27	0.637795	-44.6374	25.4558
1	LF	0.915	1.355	0.675277	-43.6974	22.9485
1	LF		1.495		-41.9884	24.4031
1	LF
1	LF	1.22	1.415	0.862191	-34.0702	14.8507
1	LF	0.97	1.465	0.662116	-43.7023	23.379
1	LF	0.945	1.265	0.747036	-48.7719	18.9616
1	LF	0.91	1.3	0.7	-46.3212	19.5825
1	LF	0.885	1.195	0.740586	-43.7688	20.0925
1	LF	0.74	1.21	0.61157	-45.1739	18.8567
1	LF	0.885	1.23	0.719512	-43.8609	18.521
1	LF	0.75	1.13	0.663717	-41.6574	14.542
1	LF	0.895	1.15	0.778261	-48.6942	19.8558
1	LF	0.86	1.245	0.690763	-41.8378	22.3996
1	LF	0.985	1.36	0.724265	-42.9888	14.176
1	LF	1.005	1.55	0.648387	-43.6069	21.081
1	LF	1.18	1.645	0.717325	-44.7699	22.8312
1	LF	1.235	1.64	0.753049	-45.2642	23.0553
1	LF	1.03	1.545	0.666667	-33.5772	21.9759
1	LF	1.04	1.475	0.705085	-43.8978	22.1308
1	LF	1.09	1.385	0.787004	-48.8433	24.4513
1	LF	1.005	1.43	0.702797	-49.9436	21.2161
1	LF	0.95	1.41	0.673759	-44.9861	25.2626
1	LF	0.93	1.35	0.688889	-46.0381	23.9888
1	LF	0.905	1.315	0.688213	-42.8919	23.2989
1	LF	0.875	1.365	0.641026	-46.0714	22.0388
1	LF	0.875	1.425	0.614035	-42.5643	24.1865
1	LF		1.675		-41.7032	18.9098
1	LF
1	LF	0.775	1.255	0.61753
1	LF	0.89	1.09	0.816514	-32.4146	19.811
1	LF	0.78	1.13	0.690265	-46.2004	22.6864
1	LF	0.8	1.175	0.680851	-51.8654	24.4545
1	LF	0.745	1.15	0.647826	-44.6081	20.6911
1	LF	0.715	1.16	0.616379	-46.7331	23.8617
1	LF	0.86	1.2	0.716667	-43.3916	23.3327
1	LF	0.87	1.23	0.707317	-44.0712	20.9432
1	LF	0.845	1.26	0.670635	-44.5178	22.3731
1	LF	0.715	1.2	0.595833	-42.5707	23.1086
1	LF	0.87	1.19	0.731092	-43.1415	24.0616
1	LF	0.84	1.215	0.691358	-44.4903	20.8561
1	LF	0.955	1.265	0.754941	-44.5724	21.541
1	LF	0.74	1.235	0.59919	-44.6638	23.6904
1	LF	0.845	1.185	0.71308	-41.7527	21.7592
1	LF	0.905	1.445	0.626298	-49.1147	19.4874
1	LF	0.91	1.09	0.834862	-37.9016	18.293
1	LF	0.855	1.27	0.673228	-46.5478	18.8077
1	LF	0.805	1.26	0.638889	-47.3713	21.1085
1	LF	0.755	1.16	0.650862	-43.9969	21.1659
1	LF	0.925	1.195	0.774059	-46.6526	17.5008
1	LF	0.75	1.235	0.607287	-44.6609	19.0427
1	LF	0.9	1.255	0.717131	-41.9752	22.3495
1	LF	0.85	1.245	0.682731	-44.676	21.2644
1	LF	0.745	1.225	0.608163	-41.9835	20.1922
1	LF	0.81	1.215	0.666667	-42.5366	23.9953
1	LF	0.875	1.32	0.662879	-44.4102	21.4238
1	LF	1.505	2.035	0.739558	-43.3405	21.7168
1	LF	1.24	1.35	0.918519	-17.6557	25.214
1	LF	0.995	1.43	0.695804	-40.3954	19.4468
1	LF	1.12	1.59	0.704403	-47.099	23.687
1	LF	1.065	1.605	0.663551	-37.4836	25.1788
1	LF	1.03	1.25	0.824	-43.8364	23.8963
1	LF	0.95	1.57	0.605096	-43.9315	22.2846
1	LF	0.94	1.37	0.686131	-42.3772	24.6629
1	LF	0.79	1.275	0.619608	-44.6922	23.6413
1	LF	1.02	1.325	0.769811	-42.8575	22.36
1	LF	0.885	1.345	0.657993	-43.4867	22.8397
1	LF	0.935	1.26	0.742063	-40.6788	24.7776
1	LF	0.9	1.325	0.679245	-46.8924	24.7276
1	LF		1.135		-51.6662	19.9924
1	LF
2	LH	0.795	1.27	0.625984
2	LH	1.01	1.42	0.711268	-25.263	25.9784
2	LH	1.095	1.54	0.711039	-29.0575	21.0899
2	LH	1.135	1.575	0.720635	-30.5299	20.9148
2	LH	1.095	1.565	0.699681	-28.05	22.4232
2	LH	1.15	1.595	0.721003	-28.2686	19.889
2	LH	0.87	1.4	0.621429	-30.0313	22.4315
2	LH	1.03	1.465	0.703072	-23.4391	24.4916
2	LH	1.04	1.45	0.717241	-30.122	20.1469
2	LH	1.09	1.505	0.724252	-29.1878	20.6316
2	LH	1.065	1.52	0.700658	-27.722	19.2786
2	LH	1.11	1.545	0.718447	-28.2787	20.6821
2	LH	1.175	1.615	0.727554	-28.6166	19.1489
2	LH	1.065	1.55	0.687097	-27.1023	19.9705
2	LH	1.065	1.495	0.712375	-27.9425	19.5715
2	LH	1.02	1.45	0.703448	-28.7186	19.487
2	LH	1.04	1.485	0.700337	-29.3645	18.4512
2	LH	0.99	1.435	0.689895	-26.619	20.1891
2	LH	1.07	1.475	0.725424	-28.554	19.3378
2	LH	0.99	1.425	0.694737	-27.8038	19.5078
2	LH	1.035	1.44	0.71875	-29.1472	18.9765
2	LH	0.995	1.405	0.708185	-28.9289	18.9206
2	LH	1.095	1.5	0.73	-29.0083	19.1553
2	LH	0.83	1.31	0.633588	-29.0669	18.5257
2	LH	1.035	1.445	0.716263	-25.6983	22.6149
2	LH	1.105	1.525	0.72459	-28.0731	19.1442
2	LH	1.095	1.565	0.699681	-28.149	20.798
2	LH	1.15	1.59	0.72327	-28.4226	17.984
2	LH	0.86	1.365	0.630037	-30.1394	19.2152
2	LH	0.985	1.435	0.686411	-25.3346	22.2479
2	LH	0.955	1.35	0.707407	-29.5639	18.3094
2	LH	0.965	1.355	0.712177	-29.3697	17.6263
2	LH	1.05	1.43	0.734266	-29.7406	19.2348
2	LH	1.1	1.545	0.711974	-29.0408	18.4591
2	LH	0.795	1.315	0.604563	-27.8709	19.1246
2	LH	1.16	1.57	0.738854	-26.8148	21.6603
2	LH	0.815	1.35	0.603704	-29.3415	18.1484
2	LH	1.08	1.485	0.727273	-26.4887	22.9467
2	LH	1.115	1.535	0.726384	-28.5392	20.5591
2	LH	0.885	1.39	0.636691	-29.2696	18.8483
2	LH				-24.6458	23.0798
2	LH	1.075	1.605	0.669782
2	LH	1.1	1.565	0.702875	-27.4274	21.7531
2	LH	1.22	1.715	0.71137	-28.6505	21.101
2	LH	0.635	1.25	0.508	-28.423	21.8169
2	LH	1.015	1.435	0.707317	-26.2905	24.1192
2	LH	0.985	1.4	0.703571	-28.0871	19.5495
2	LH	1.03	1.435	0.71777	-30.3581	19.5644
2	LH	1.04	1.445	0.719723	-29.4351	19.7244
2	LH	1.155	1.57	0.735669	-29.5253	19.4629
2	LH	1.23	1.76	0.698864	-29.3283	20.5447
2	LH	1.27	1.645	0.772036	-23.8816	21.4511
2	LH	0.905	1.425	0.635088	-26.742	22.6429
2	LH	1.01	1.405	0.718861	-30.2143	19.2455
2	LH	1.115	1.51	0.738411	-28.429	19.3623
2	LH	0.955	1.435	0.665505	-29.3569	19.7325
2	LH	1.115	1.525	0.731148	-28.6643	18.5978
2	LH	1.04	1.465	0.709898	-28.2576	18.3067
2	LH	1.06	1.465	0.723549	-29.2843	19.0077
2	LH	1.12	1.54	0.727273	-28.8861	19.6628
2	LH	0.805	1.32	0.609848	-29.6403	18.796
2	LH	1.085	1.5	0.723333	-26.4929	22.8062
2	LH	1.04	1.51	0.688742	-29.321	19.3045
2	LH	1.475	1.905	0.774278	-27.8412	18.8738
2	LH	0.845	1.565	0.539936	-28.2063	19.5459
2	LH	1.095	1.54	0.711039	-23.257	24.0643
2	LH	1.175	1.595	0.736677	-27.6118	19.9096
2	LH	1.25	1.705	0.733138	-26.7401	18.0589
2	LH	1.065	1.535	0.693811	-28.0732	20.5802
2	LH	1.1	1.49	0.738255	-28.7064	19.8202
2	LH	1.02	1.45	0.703448	-27.5959	21.5325
2	LH	1.065	1.475	0.722034	-28.9205	18.9954
2	LH	1.18	1.63	0.723926	-29.195	18.4654
2	LH	0.835	1.365	0.611722	-29.1603	18.6307
2	LH	1.09	1.535	0.710098	-25.5221	22.5042
2	LH	1.355	1.795	0.754875	-29.0915	19.673
2	LH	1.725	2.29	0.753275	-25.0988	22.6771
2	LH	1.02	1.885	0.541114	-25.0109	17.1065
2	LH	1.695	2.19	0.773973	-24.9093	24.5649
2	LH	0.955	1.685	0.566766	-21.5979	19.1089
2	LH	1.11	1.565	0.709265	-23.7702	22.0563
2	LH				-27.4434	19.6965
2	LH	1.055	1.425	0.740351
2	LH	1.09	1.47	0.741497	-22.5495	20.9298
2	LH	0.965	1.37	0.70438	-26.865	23.1215
2	LH	1.02	1.42	0.71831	-27.7979	19.8967
2	LH	1.1	1.515	0.726073	-28.639	20.6052
2	LH	0.78	1.275	0.611765	-29.2885	19.4541
2	LH	0.93	1.335	0.696629	-27.6794	22.9977
2	LH	1.135	1.54	0.737013	-30.0535	20.3024
2	LH	0.72	1.255	0.573705	-29.6985	17.9954
2	LH	1.025	1.445	0.709343	-26.3544	23.1836
2	LH	1.05	1.465	0.716724	-28.5836	19.3373
2	LH	1.065	1.49	0.714765	-30.075	18.3421
2	LH	1.04	1.475	0.705085	-29.5833	18.3171
2	LH	1.035	1.465	0.706485	-29.1569	19.5076
2	LH	1.035	1.45	0.713793	-29.5769	19.4184
2	LH	0.995	1.43	0.695804	-30.4345	19.3288
2	LH	0.985	1.405	0.701068	-29.3402	18.5759
2	LH	1.1	1.51	0.728477	-30.4307	18.2962
2	LH	0.69	1.24	0.556452	-31.7396	19.5654
2	LH	1.065	1.47	0.72449	-26.2714	22.5607
2	LH	0.865	1.365	0.6337	-30.4159	18.5798
2	LH	0.845	1.37	0.616788	-25.668	21.8954
2	LH	0.835	1.365	0.611722	-25.6427	22.9857
2	LH	0.715	1.24	0.576613	-26.2065	22.1181
2	LH	0.97	1.365	0.710623	-27.4514	21.2266
2	LH	0.955	1.355	0.704797	-29.851	17.9322
2	LH	0.98	1.365	0.717949	-29.9135	18.9499
2	LH	1.065	1.475	0.722034	-30.2328	17.9888
2	LH	1.435	1.915	0.749347	-27.8094	16.8928
2	LH	0.915	1.4	0.653571	-28.1661	21.5841
2	LH	0.995	1.395	0.713262	-28.2827	18.7515
2	LH	0.965	1.355	0.712177	-29.3888	17.8727
2	LH	1.05	1.44	0.729167	-31.1339	18.9499
2	LH	0.725	1.23	0.589431	-31.6131	18.3533
2	LH	1.07	1.48	0.722973	-26.5145	21.5585
2	LH	0.88	1.385	0.635379	-30.6035	17.5254
2	LH	0.85	1.395	0.609319	-24.7999	22.2442
2	LH	0.77	1.275	0.603922	-26.2978	22.6862
2	LH	1.085	1.505	0.72093	-25.2145	22.3133
2	LH	0.74	1.245	0.594378	-29.884	17.5649
2	LH	1.1	1.475	0.745763	-26.6786	20.5642
2	LH	0.725	1.245	0.582329	-30.438	18.266
2	LH				-28.3333	22.0711
2	LH	1.07	1.415	0.756184
2	LH	1.095	1.495	0.732441	-21.2918	22.9415
2	LH	1.135	1.555	0.729904	-26.5479	20.627
2	LH	1.075	1.525	0.704918	-28.4195	21.9836
2	LH	0.925	1.355	0.682657	-28.9142	20.5612
2	LH	1.02	1.42	0.71831	-30.2154	18.7187
2	LH	1.07	1.51	0.708609	-28.768	19.1725
2	LH	1.1	1.525	0.721311	-29.4253	18.7634
2	LH	1.18	1.615	0.73065	-28.365	19.2465
2	LH	0.815	1.355	0.601476	-28.7464	18.5677
2	LH	1.05	1.49	0.704698	-26.4002	21.0632
2	LH	0.99	1.395	0.709677	-29.5407	19.3951
2	LH	0.99	1.415	0.699647	-29.4037	18.7663
2	LH	1.11	1.52	0.730263	-29.923	18.9973
2	LH	0.8	1.32	0.606061	-29.1862	19.1952
2	LH	0.93	1.335	0.696629	-27.3754	22.4728
2	LH	1.03	1.44	0.715278	-30.6596	18.3389
2	LH	0.795	1.3	0.611538	-30.9003	19.7378
2	LH	0.72	1.235	0.582996	-28.7023	23.2058
2	LH	0.62	1.13	0.548673	-28.8907	23.4954
2	LH	0.905	1.295	0.698842	-28.4498	22.006
2	LH	0.7	1.185	0.590717	-33.3537	19.2803
2	LH	0.725	1.2	0.604167	-29.6316	21.6314
2	LH	0.75	1.235	0.607287	-29.3297	23.4207
2	LH	0.7	1.205	0.580913	-30.5187	21.8845
2	LH	0.895	1.325	0.675472	-28.8878	22.9715
2	LH	0.96	1.37	0.70073	-30.7015	18.1015
2	LH	0.94	1.355	0.693727	-30.469	18.5823
2	LH	0.97	1.36	0.713235	-29.7032	19.4395
2	LH	1.055	1.46	0.722603	-30.296	18.8308
2	LH	0.715	1.225	0.583673	-30.2946	19.406
2	LH	0.955	1.365	0.699634	-26.151	22.0256
2	LH	0.94	1.33	0.706767	-31.6728	18.7616
2	LH	0.955	1.365	0.699634	-29.6271	19.4728
2	LH	0.69	1.195	0.577406	-32.4963	18.2211
2	LH	0.955	1.385	0.689531	-27.4772	23.0264
2	LH	0.975	1.39	0.701439	-30.3316	19.1547
2	LH	0.965	1.365	0.70696	-29.7847	19.5666
2	LH	0.975	1.385	0.703971	-30.7072	18.2645
2	LH	1.12	1.525	0.734426	-29.3802	19.9371
2	LH	0.765	1.27	0.602362	-28.7403	20.0853
2	LH	1.005	1.41	0.712766	-27.2235	22.4959
2	LH	1.005	1.425	0.705263	-30.3388	20.5277
2	LH	1.04	1.475	0.705085	-30.729	17.1219
2	LH	1.11	1.54	0.720779	-30.0824	20.4869
2	LH				-30.7331	19.7949
2	LH	0.705	1.375	0.512727
2	LH	0.575	0.995	0.577889	-29.5028	22.3647
2	LH	0.84	1.255	0.669323	-30.0386	22.4827
2	LH	0.865	1.43	0.604895	-23.5925	27.0915
2	LH	0.745	1.185	0.628692	-30.8094	16.6578
2	LH	0.88	1.39	0.633094	-30.6652	21.8546
2	LH	0.825	1.365	0.604396	-26.0861	20.1166
2	LH	0.995	1.53	0.650327	-27.7537	24.4712
2	LH	1.135	1.595	0.711599	-28.5485	19.7826
2	LH	1.185	1.615	0.733746	-27.1459	21.2682
2	LH	1.14	1.63	0.699387	-27.3382	21.7537
2	LH	1.375	1.82	0.755495	-29.6539	19.0663
2	LH	1.05	1.65	0.636364	-27.5006	21.0205
2	LH	1.015	1.55	0.654839	-22.9907	23.796
2	LH	0.965	1.53	0.630719	-24.8999	22.244
2	LH	0.99	1.5	0.66	-27.2369	21.8365
2	LH	0.86	1.36	0.632353	-25.3496	22.5282
2	LH	1.18	1.605	0.735202	-25.9154	22.2189
2	LH	0.875	1.45	0.603448	-27.9914	21.0871
2	LH	1.545	1.985	0.778338	-26.1242	22.5969
2	LH	1.01	1.525	0.662295	-21.1518	16.044
2	LH	1.13	1.575	0.71746	-29.077	24.0857
2	LH	0.825	1.31	0.629771	-27.7763	17.8037
2	LH	0.685	1.19	0.57563	-29.0155	22.2429
2	LH	0.735	1.19	0.617647	-31.7026	20.938
2	LH	0.62	1.165	0.532189	-29.0482	23.6821
2	LH	0.945	1.33	0.710526	-26.9704	24.108
2	LH	0.955	1.365	0.699634	-30.3702	18.9919
2	LH	1.06	1.475	0.718644	-29.9265	19.7364
2	LH	0.73	1.245	0.586345	-30.1147	18.9055
2	LH	0.985	1.41	0.698582	-25.6862	23.2117
2	LH	0.98	1.395	0.702509	-31.0619	18.8242
2	LH	1.01	1.41	0.716312	-28.258	19.4058
2	LH	1.09	1.54	0.707792	-31.6012	18.5713
2	LH	1.05	1.495	0.702341	-28.5191	20.4887
2	LH	0.93	1.355	0.686347	-28.4466	19.4927
2	LH	0.99	1.39	0.71223	-30.4243	19.5617
2	LH	1.005	1.42	0.707746	-29.8758	19.3223
2	LH				-29.5893	17.9837
2	LH	1.005	1.43	0.702797
2	LH	1.065	1.485	0.717172	-28.9105	19.6155
2	LH	0.725	1.22	0.594262	-30.4616	18.8806
2	LH	1.01	1.415	0.713781	-26.6499	22.2549
2	LH	0.74	1.24	0.596774	-32.6072	19.0545
2	LH	0.945	1.37	0.689781	-26.8583	23.8239
2	LH	1.03	1.46	0.705479	-31.618	19.6121
2	LH	0.78	1.315	0.593156	-32.0957	19.3607
2	LH	0.75	1.265	0.592885	-29.0625	21.3865
2	LH	0.96	1.385	0.693141	-26.9068	23.1176
2	LH	1.055	1.475	0.715254	-30.1792	18.5605
2	LH	0.735	1.24	0.592742	-30.6022	19.2793
2	LH	0.8	1.28	0.625	-29.7759	22.1533
2	LH	0.715	1.255	0.569721	-27.6581	23.8892
2	LH	0.91	1.32	0.689394	-26.6393	22.4342
2	LH	0.715	1.12	0.638393	-34.1036	17.6583
2	LH	0.655	1.165	0.562232	-29.6248	24.0524
2	LH	0.67	1.135	0.590308	-29.4473	23.4169
2	LH	0.655	1.16	0.564655	-29.947	23.0377
2	LH	0.945	1.35	0.7	-27.8394	23.9949
2	LH	0.68	1.185	0.57384	-33.4832	18.4828
2	LH	0.725	1.215	0.596708	-31.6008	22.0667
2	LH	0.695	1.19	0.584034	-29.2823	24.7709
2	LH	0.68	1.15	0.591304	-30.7859	22.2616
2	LH	0.735	1.24	0.592742	-29.8675	22.6551
2	LH	0.72	1.2	0.6	-28.9089	26.3019
2	LH	0.79	1.29	0.612403	-27.6138	23.2678
2	LH	0.67	1.165	0.575107	-28.3037	23.055
2	LH	0.955	1.345	0.710037	-27.8548	24.0561
2	LH	1.03	1.445	0.712803	-32.58	17.5227
2	LH	0.775	1.27	0.610236	-29.1906	19.5232
2	LH	0.765	1.245	0.614458	-28.9093	21.353
2	LH	0.73	1.215	0.600823	-28.1049	23.0658
2	LH	0.75	1.245	0.60241	-29.3887	23.9417
2	LH	0.725	1.225	0.591837	-29.1956	24.4999
2	LH	0.68	1.185	0.57384	-29.6366	23.4157
2	LH				-30.8487	22.3406
2	LH	0.975	1.515	0.643564
2	LH	1.17	1.695	0.690265	-30.1334	15.5889
2	LH	0.855	1.315	0.65019	-23.5476	24.3107
2	LH	1.13	1.545	0.731392	-31.1631	18.7661
2	LH	1.135	1.625	0.698462	-24.8331	24.423
2	LH	0.755	1.265	0.596838	-31.2989	17.5704
2	LH	1.14	1.57	0.726115	-26.0854	22.2608
2	LH	1.175	1.61	0.729814	-29.0605	20.5184
2	LH	1.185	1.67	0.709581	-29.2267	20.3355
2	LH	1.33	1.85	0.718919	-28.6869	20.1439
2	LH	1.5	2.01	0.746269	-25.559	20.9855
2	LH	1.265	1.865	0.678284	-27.6728	18.1985
2	LH	1.37	1.9	0.721053	-25.6249	19.726
2	LH	1.18	1.695	0.696165	-26.2217	22.1947
2	LH	1.135	1.63	0.696319	-31.2369	16.1012
2	LH	1.445	1.96	0.737245	-23.853	24.7037
2	LH	1.96	2.515	0.779324	-25.3098	15.9336
2	LH	1.005	1.565	0.642173	-13.9825	21.2515
2	LH	1.06	1.695	0.625369	-20.8004	23.6883
2	LH	1.25	1.76	0.710227	-23.8268	23.7192
2	LH	1.32	1.76	0.75	-27.8079	19.9396
2	LH	1.325	1.85	0.716216	-26.7916	21.3213
2	LH	1.335	1.895	0.704485	-22.6879	21.6526
2	LH	1.485	1.995	0.744361	-23.0444	23.2116
2	LH	1.175	1.78	0.660112	-23.9567	18.4095
2	LH	1.3	1.805	0.720222	-25.0065	26.0987
2	LH	1.19	1.645	0.723404	-27.7708	20.1723
2	LH	1.13	1.58	0.71519	-28.9719	16.0639
2	LH	1.205	1.655	0.728097	-28.0315	19.5576
2	LH	1.26	1.735	0.726225	-27.3405	20.1021
2	LH	1.15	1.63	0.705521	-28.0546	19.901
2	LH	1.02	1.465	0.696246	-29.5262	18.9576
2	LH	1.035	1.445	0.716263	-29.9403	18.4218
2	LH	1.045	1.475	0.708475	-28.4734	21.8285
2	LH	1.105	1.52	0.726974	-28.507	19.6817
2	LH	1.11	1.545	0.718447	-29.2	19.0448
2	LH	1.11	1.555	0.713826	-28.2756	20.038
2	LH	1.15	1.57	0.732484	-28.4149	19.5493
2	LH	1.12	1.55	0.722581	-28.0636	19.5461
2	LH	1.105	1.52	0.726974	-28.8406	19.0862
2	LH	1.07	1.495	0.715719	-28.5149	19.7872
2	LH	1.05	1.485	0.707071	-29.1752	18.5705
2	LH	1.055	1.465	0.720137	-29.3368	19.8278
2	LH	1.08	1.495	0.722408	-28.446	19.5145
2	LH	1.15	1.58	0.727848	-29.129	18.9521
2	LH				-29.4749	19.0882
2	RH	0.93	1.27	0.732283	-29.2161	20.4206
2	RH	1.08	1.42	0.760563	-28.1632	18.8649
2	RH	1.06	1.54	0.688312	-27.3547	22.7962
2	RH	1.285	1.575	0.815873	-28.0617	19.9501
2	RH	0.75	1.565	0.479233	-26.9928	20.7034
2	RH	1.12	1.595	0.702194	-22.5693	24.8172
2	RH	0.88	1.4	0.628571	-26.2897	20.1137
2	RH	0.71	1.465	0.484642	-24.5301	24.6784
2	RH	1.03	1.45	0.710345	-23.861	25.5553
2	RH	1.23	1.505	0.817276	-28.3207	19.4062
2	RH	0.705	1.52	0.463816	-26.6991	19.2309
2	RH	1.225	1.545	0.79288	-23.1722	24.275
2	RH	0.91	1.615	0.563467	-29.0564	18.8804
2	RH	1.085	1.55	0.7	-25.0011	21.548
2	RH	0.98	1.495	0.655518	-27.7783	20.6063
2	RH	1.055	1.45	0.727586	-28.157	21.166
2	RH	1.06	1.485	0.713805	-27.4516	19.6192
2	RH	0.995	1.435	0.69338	-29.0287	21.0906
2	RH	1.025	1.475	0.694915	-27.7954	21.3376
2	RH	0.98	1.425	0.687719	-28.765	19.1183
2	RH	0.995	1.44	0.690972	-27.4331	20.7357
2	RH	0.98	1.405	0.697509	-28.2215	19.7664
2	RH	0.95	1.5	0.633333	-27.7305	20.0201
2	RH	0.99	1.31	0.755725	-28.2791	19.0868
2	RH	1.045	1.445	0.723183	-27.2917	20.4488
2	RH	1.18	1.525	0.77377	-28.0429	20.6048
2	RH	1.07	1.565	0.683706	-27.4318	21.3057
2	RH	0.96	1.59	0.603774	-26.6987	21.7763
2	RH	1.075	1.365	0.787546	-27.8653	19.3369
2	RH	0.95	1.435	0.662021	-27.5811	19.9667
2	RH	0.93	1.35	0.688889	-29.5414	19.0733
2	RH	0.945	1.355	0.697417	-27.406	21.4395
2	RH	1.025	1.43	0.716783	-27.292	19.4371
2	RH	1.03	1.545	0.666667	-26.7751	19.6541
2	RH	1.025	1.315	0.779468	-27.8722	19.2064
2	RH	1.005	1.57	0.640127	-27.408	21.5829
2	RH	0.995	1.35	0.737037	-26.7807	20.6322
2	RH	1.03	1.485	0.693603	-28.0797	20.0466
2	RH	1.02	1.535	0.664495	-28.3136	20.6109
2	RH		1.39		-26.8819	19.9046
2	RH
2	RH	0.725	1.605	0.451713	-22.2616	23.6395
2	RH	1.285	1.565	0.821086	-23.8085	26.2487
2	RH	0.71	1.715	0.413994	-26.7394	22.8895
2	RH	1.01	1.25	0.808	-25.2687	23.4866
2	RH	1	1.435	0.696864	-27.2514	21.3124
2	RH	1.015	1.4	0.725	-29.0266	20.463
2	RH	0.99	1.435	0.689895	-27.6182	21.3988
2	RH	1.025	1.445	0.709343	-27.8662	21.3394
2	RH	1.57	1.57		-28.522	20.5971
2	RH	0.66	1.76	0.375	-24.8156	17.2928
2	RH	0.805	1.645	0.489362	-20.8677	29.3294
2	RH	0.98	1.425	0.687719	-25.4398	24.6156
2	RH	1.01	1.405	0.718861	-28.2459	21.1706
2	RH	1.045	1.51	0.692053	-26.3976	21.6972
2	RH	1.03	1.435	0.71777	-26.1547	21.6962
2	RH	1.065	1.525	0.698361	-26.6151	21.6028
2	RH	0.99	1.465	0.675768	-28.4886	19.9226
2	RH	1.025	1.465	0.699659	-27.7587	19.6683
2	RH	0.98	1.54	0.636364	-28.5511	20.5342
2	RH	1.005	1.32	0.761364	-27.9333	20.6267
2	RH	1.085	1.5	0.723333	-27.5737	21.0371
2	RH	1.145	1.51	0.758278	-26.9523	21.4989
2	RH	1.445	1.905	0.75853	-26.8141	22.4954
2	RH	0.775	1.565	0.495208	-25.6489	17.4159
2	RH	1.09	1.54	0.707792	-23.0402	23.4099
2	RH	1.365	1.595	0.855799	-25.9005	21.3502
2	RH	0.93	1.705	0.545455	-26.1457	20.7592
2	RH	0.66	1.535	0.429967	-24.0906	22.7749
2	RH	1.055	1.49	0.708054	-23.8698	23.5916
2	RH	1.025	1.45	0.706897	-28.5999	20.0135
2	RH	1.095	1.475	0.742373	-28.2328	19.532
2	RH	1.005	1.63	0.616564	-27.3118	21.5761
2	RH	1.09	1.365	0.798535	-27.9172	19.9148
2	RH	1.125	1.535	0.732899	-27.0191	21.8954
2	RH	1.595	1.795	0.888579	-25.8202	19.5151
2	RH	1.545	2.29	0.674672	-26.6586	19.6769
2	RH	1.04	1.885	0.551724	-20.1042	24.6768
2	RH	1.27	2.19	0.579909	-23.0741	22.3086
2	RH	1.135	1.685	0.673591	-22.393	23.3118
2	RH		1.565		-26.6056	20.9296
2	RH
2	RH	1.02	1.425	0.715789
2	RH	0.605	1.47	0.411565	-19.0131	24.6917
2	RH	0.96	1.37	0.70073	-24.0148	23.5572
2	RH	1.015	1.42	0.714789	-26.873	19.1838
2	RH	0.955	1.515	0.630363	-27.0926	19.2299
2	RH	0.9	1.275	0.705882	-27.1372	20.9439
2	RH	1	1.335	0.749064	-28.9109	21.1161
2	RH	0.935	1.54	0.607143	-27.8072	20.0014
2	RH	1.025	1.255	0.816733	-29.334	19.1397
2	RH	1.025	1.445	0.709343	-27.3614	20.6533
2	RH	1.025	1.465	0.699659	-27.5709	19.9869
2	RH	1.16	1.49	0.778523	-28.324	20.5595
2	RH	0.85	1.475	0.576271	-28.2981	19.3424
2	RH	1.005	1.465	0.686007	-25.3088	23.6441
2	RH	1	1.45	0.689655	-28.5248	20.891
2	RH	0.99	1.43	0.692308	-28.4752	19.5732
2	RH	0.965	1.405	0.686833	-27.1833	21.1017
2	RH	0.95	1.51	0.629139	-29.0244	20.4467
2	RH	0.985	1.24	0.794355	-29.1307	18.9086
2	RH	0.93	1.47	0.632653	-27.7975	19.8806
2	RH	0.97	1.365	0.710623	-28.3917	18.2173
2	RH	0.955	1.37	0.69708	-27.9995	19.9385
2	RH	0.965	1.365	0.70696	-29.0494	18.0169
2	RH	0.945	1.24	0.762097	-28.1141	19.8744
2	RH	0.955	1.365	0.699634	-28.8694	19.1655
2	RH	0.935	1.355	0.690037	-28.4858	20.2259
2	RH	0.98	1.365	0.717949	-28.6897	20.2458
2	RH	1.53	1.475		-26.9264	19.8712
2	RH	0.645	1.915	0.336815	-23.4007	18.5321
2	RH	0.99	1.4	0.707143	-28.085	24.0468
2	RH	0.925	1.395	0.663082	-27.495	20.2006
2	RH	0.925	1.355	0.682657	-27.2741	19.7059
2	RH	0.925	1.44	0.642361	-30.1259	17.9595
2	RH	0.975	1.23	0.792683	-29.3002	19.6869
2	RH	0.92	1.48	0.621622	-28.4529	21.3091
2	RH	1.02	1.385	0.736462	-28.1757	18.8889
2	RH	0.965	1.395	0.691756	-28.2838	19.7963
2	RH	1.025	1.275	0.803922	-28.7146	17.6329
2	RH	0.94	1.505	0.624585	-28.1103	19.8341
2	RH	0.925	1.245	0.742972	-28.2773	19.6357
2	RH	0.945	1.475	0.640678	-29.4637	19.5764
2	RH		1.245		-29.0317	19.3032
2	RH
2	RH	0.905	1.415	0.639576	-11.279	32.457
2	RH	1.215	1.495	0.812709	-24.9645	21.7551
2	RH	0.75	1.555	0.482315	-27.2276	20.3798
2	RH	0.945	1.525	0.619672	-24.343	24.7229
2	RH	0.94	1.355	0.693727	-30.0245	16.7165
2	RH	1.22	1.42	0.859155	-28.5777	20.6233
2	RH	0.7	1.51	0.463576	-28.7601	19.7015
2	RH	1.165	1.525	0.763934	-23.9895	23.953
2	RH	0.83	1.615	0.513932	-28.1489	20.8409
2	RH	1.215	1.355	0.896679	-27.1809	22.8141
2	RH	0.64	1.49	0.42953	-28.1645	21.5674
2	RH	0.985	1.395	0.706093	-25.6392	22.7717
2	RH	1.125	1.415	0.795053	-28.9721	20.2459
2	RH	0.71	1.52	0.467105	-29.9039	19.5589
2	RH	0.935	1.32	0.708333	-24.9504	24.8831
2	RH	0.92	1.335	0.689139	-31.6103	17.7479
2	RH	0.91	1.44	0.631944	-29.6604	19.646
2	RH	0.835	1.3	0.642308	-31.0724	19.3004
2	RH	0.845	1.235	0.684211	-32.7464	20.737
2	RH	0.8	1.13	0.707965	-31.9234	18.0481
2	RH	0.835	1.295	0.644788	-32.1118	17.9911
2	RH	0.81	1.185	0.683544	-32.9013	18.3944
2	RH	0.81	1.2	0.675	-32.7538	18.0472
2	RH	0.85	1.235	0.688259	-33.3506	20.7231
2	RH	0.93	1.205	0.771784	-32.5184	18.5874
2	RH	0.94	1.325	0.709434	-31.3497	18.5407
2	RH	0.96	1.37	0.70073	-30.1756	19.7111
2	RH	0.93	1.355	0.686347	-29.2507	17.9209
2	RH	0.945	1.36	0.694853	-29.9364	18.499
2	RH	0.92	1.46	0.630137	-30.8213	18.2652
2	RH	0.96	1.225	0.783673	-30.8022	17.3048
2	RH	0.91	1.365	0.666667	-30.3798	19.8238
2	RH	0.885	1.33	0.665414	-31.0047	18.4151
2	RH	0.86	1.365	0.630037	-32.1893	19.2522
2	RH	0.945	1.195	0.790795	-32.7172	18.9931
2	RH	0.96	1.385	0.693141	-29.9738	20.7175
2	RH	0.955	1.39	0.68705	-30.0572	19.5043
2	RH	0.94	1.365	0.688645	-31.1941	19.3012
2	RH	0.985	1.385	0.711191	-29.5495	18.9857
2	RH	0.96	1.525	0.629508	-29.0456	19.779
2	RH	0.95	1.27	0.748031	-31.1823	18.8218
2	RH	1	1.41	0.70922	-30.8852	19.5348
2	RH	1.015	1.425	0.712281	-30.8413	20.3219
2	RH	1.215	1.475	0.823729	-28.4256	21.3848
2	RH		1.54		-29.5594	20.5929
2	RH
2	RH	0.41	1.375	0.298182	-24.3992	23.8612
2	RH	0.665	0.995	0.668342	-27.1737	24.2574
2	RH	1.16	1.255	0.924303	-29.8246	22.6377
2	RH	0.63	1.43	0.440559	-27.7125	21.3433
2	RH	0.905	1.185	0.763713	-31.9667	20.7762
2	RH	0.975	1.39	0.701439	-29.2816	22.4173
2	RH	1.125	1.365	0.824176	-29.731	19.0402
2	RH	1.23	1.53	0.803922	-28.0422	22.3111
2	RH	0.86	1.595	0.539185	-29.196	19.2121
2	RH	1.345	1.615	0.832817	-26.1939	22.2837
2	RH	0.955	1.63	0.58589	-27.5047	21.4851
2	RH	0.915	1.82	0.502747	-24.3131	24.7074
2	RH	0.885	1.65	0.536364	-23.3825	22.4147
2	RH	1.155	1.55	0.745161	-26.2077	22.9254
2	RH	0.975	1.53	0.637255	-27.932	22.0641
2	RH	0.98	1.5	0.653333	-29.5795	18.9503
2	RH	1.01	1.36	0.742647	-29.3814	21.7928
2	RH	1.26	1.605	0.785047	-30.3517	20.4374
2	RH	0.875	1.45	0.603448	-27.9483	21.6924
2	RH	1.445	1.985	0.72796	-24.4386	20.0728
2	RH	0.92	1.525	0.603279	-19.9788	18.8431
2	RH	0.925	1.575	0.587302	-24.9536	24.4411
2	RH	0.935	1.31	0.71374	-30.142	24.2143
2	RH	0.505	1.19	0.42437	-30.8684	25.8322
2	RH	0.865	1.19	0.726891	-31.1566	23.0475
2	RH	0.885	1.165	0.759657	-30.3395	19.3882
2	RH	0.92	1.33	0.691729	-31.1383	20.1198
2	RH	0.955	1.365	0.699634	-29.7507	20.5641
2	RH	0.905	1.475	0.613559	-30.8235	19.4914
2	RH	1	1.245	0.803213	-30.194	19.8432
2	RH	0.925	1.41	0.656028	-28.9791	21.9669
2	RH	0.955	1.395	0.684588	-29.0319	20.2107
2	RH	1.015	1.41	0.719858	-29.1842	20.4261
2	RH	1.075	1.54	0.698052	-27.7207	22.0263
2	RH	0.975	1.495	0.652174	-28.8825	18.6407
2	RH	0.955	1.355	0.704797	-30.2749	18.3478
2	RH		1.39		-30.114	20.3487
2	RH		1.42
2	RH
2	RH	0.99	1.43	0.692308	-23.9564	25.7776
2	RH	0.905	1.485	0.609428	-28.2589	21.1363
2	RH	0.865	1.22	0.709016	-29.8529	20.0102
2	RH	0.885	1.415	0.625442	-30.0005	21.346
2	RH	0.925	1.24	0.745968	-30.9396	19.1198
2	RH	0.91	1.37	0.664234	-30.6205	20.8534
2	RH	0.94	1.46	0.643836	-31.1078	20.0228
2	RH	0.905	1.315	0.688213	-30.9922	20.2128
2	RH	0.955	1.265	0.754941	-30.4458	20.2773
2	RH	0.955	1.385	0.689531	-30.6199	20.1218
2	RH	0.89	1.475	0.60339	-29.8814	19.8845
2	RH	0.79	1.24	0.637097	-32.5037	19.2006
2	RH	0.925	1.28	0.722656	-32.9363	19.1012
2	RH	1.065	1.255	0.848606	-31.0328	19.9656
2	RH	0.39	1.32	0.295455	-29.9795	24.2982
2	RH	0.84	1.12	0.75	-31.3175	22.4483
2	RH	0.855	1.165	0.733906	-32.622	20.1221
2	RH	0.65	1.135	0.572687	-34.3129	17.8259
2	RH	0.86	1.16	0.741379	-28.5248	24.5132
2	RH	0.835	1.35	0.618519	-32.3241	19.5522
2	RH	0.785	1.185	0.662447	-32.882	20.0664
2	RH	0.82	1.215	0.674897	-34.4853	18.9181
2	RH	0.82	1.19	0.689076	-33.6295	19.1838
2	RH	0.67	1.15	0.582609	-34.5638	16.7379
2	RH	0.77	1.24	0.620968	-28.928	23.8329
2	RH	0.855	1.2	0.7125	-34.8362	17.2804
2	RH	0.865	1.29	0.670543	-31.2957	20.3748
2	RH	0.91	1.165	0.781116	-31.6158	19.1336
2	RH	0.875	1.345	0.650558	-29.7559	21.6935
2	RH	1	1.445	0.692042	-30.0071	19.2082
2	RH	0.625	1.27	0.492126	-30.6384	18.9414
2	RH	0.815	1.245	0.654618	-28.6248	22.6007
2	RH	0.835	1.215	0.687243	-33.0387	18.2331
2	RH	0.83	1.245	0.666667	-33.2326	18.8494
2	RH	0.805	1.225	0.657143	-33.5453	18.4562
2	RH		1.185		-33.4532	18.6524
2	RH
2	RH	1.265	1.515	0.834983
2	RH	0.775	1.695	0.457227	-20.1795	25.1542
2	RH	0.79	1.315	0.60076	-29.5364	24.1062
2	RH	1.28	1.545	0.828479	-26.4198	22.2554
2	RH	0.72	1.625	0.443077	-28.4711	20.8658
2	RH	1.25	1.265	0.988142	-27.24	23.2911
2	RH	0.755	1.57	0.480892	-27.799	23.0124
2	RH	1.17	1.61	0.726708	-26.2746	25.6939
2	RH	1.405	1.67	0.841317	-29.5537	22.4252
2	RH	1.195	1.85	0.645946	-27.7146	19.1874
2	RH	1.405	2.01	0.699005	-23.2495	23.3689
2	RH	1.26	1.865	0.675603	-24.8562	25.7054
2	RH	1.06	1.9	0.557895	-23.3357	22.9486
2	RH	0.975	1.695	0.575221	-24.8627	24.0988
2	RH	1.12	1.63	0.687117	-23.8498	22.0934
2	RH	1.405	1.96	0.716837	-23.2135	21.659
2	RH	1.565	2.515	0.622266	-21.302	17.5468
2	RH	0.935	1.565	0.597444	-31.9138	22.3126
2	RH	1.49	1.695	0.879056	-23.1631	25.2293
2	RH	0.95	1.76	0.539773	-26.9386	20.6704
2	RH	1.205	1.76	0.684659	-23.824	23.5148
2	RH	1.15	1.85	0.621622	-26.1494	20.2374
2	RH	1.22	1.895	0.643799	-23.3342	20.1721
2	RH	1.42	1.995	0.711779	-25.4561	19.6721
2	RH	1.125	1.78	0.632022	-21.3792	23.2733
2	RH	0.805	1.805	0.445983	-25.0945	24.9597
2	RH	1.095	1.645	0.665653	-24.2657	26.4392
2	RH	1.175	1.58	0.743671	-27.5525	20.9877
2	RH	1.36	1.655	0.821752	-29.0386	18.6607
2	RH	0.855	1.735	0.492795	-27.6639	20.8689
2	RH	1.165	1.63	0.714724	-24.8947	24.8957
2	RH	0.745	1.465	0.508532	-29.3108	19.611
2	RH	1.035	1.445	0.716263	-25.8062	24.849
2	RH	1.06	1.475	0.718644	-29.1988	19.3892
2	RH	1.1	1.52	0.723684	-28.8832	19.0499
2	RH	1.105	1.545	0.71521	-28.8035	19.7203
2	RH	1.085	1.555	0.697749	-28.4832	20.4051
2	RH	1.115	1.57	0.710191	-28.1921	18.1369
2	RH	1.035	1.55	0.667742	-28.3863	18.5864
2	RH	1.065	1.52	0.700658	-29.0491	19.6544
2	RH	1.06	1.495	0.70903	-29.784	20.0212
2	RH	0.99	1.485	0.666667	-28.6141	20.4622
2	RH	1.045	1.465	0.713311	-29.7787	20.8292
2	RH	1.08	1.495	0.722408	-29.6612	20.7261
2	RH		1.58		-29.4764	20.8631
2	RH
2	RF	1.005	1.27	0.791339	-50.8005	20.7432
2	RF	1.02	1.42	0.71831	-47.2591	23.7759
2	RF	1.09	1.54	0.707792	-52.345	22.002
2	RF	1.13	1.575	0.71746	-43.2122	25.3354
2	RF	1.08	1.565	0.690096	-44.1264	24.0011
2	RF	1.055	1.595	0.661442	-51.2295	22.7958
2	RF	1.025	1.4	0.732143	-41.7725	25.8862
2	RF	1.075	1.465	0.733788	-55.7679	21.4059
2	RF	1	1.45	0.689655	-52.813	23.8482
2	RF	1.105	1.505	0.734219	-50.9117	21.1709
2	RF	1.155	1.52	0.759868	-49.1628	22.941
2	RF	1.105	1.545	0.71521	-50.0849	22.4605
2	RF	1.205	1.615	0.74613	-50.3204	18.3098
2	RF	1.005	1.55	0.648387	-46.7904	24.6251
2	RF	1.075	1.495	0.719064	-50.3133	20.4412
2	RF	1.11	1.45	0.765517	-53.8233	18.9773
2	RF	0.98	1.485	0.659933	-47.8556	22.3709
2	RF	1.055	1.435	0.735192	-49.8901	21.5551
2	RF	0.99	1.475	0.671186	-50.4434	23.0889
2	RF	1.005	1.425	0.705263	-49.578	21.6945
2	RF	1	1.44	0.694444	-48.7028	22.9195
2	RF	1.005	1.405	0.715302	-52.0375	22.9116
2	RF	0.945	1.5	0.63	-51.908	24.1293
2	RF	1	1.31	0.763359	-48.9283	21.7177
2	RF	1.07	1.445	0.740484	-48.6602	24.8189
2	RF	1.045	1.525	0.685246	-50.3467	20.4168
2	RF	1.12	1.565	0.715655	-46.9512	23.2416
2	RF	0.99	1.59	0.622642	-47.8415	23.0834
2	RF	1.045	1.365	0.765568	-47.3228	22.7223
2	RF	0.85	1.435	0.592334	-48.1945	24.6768
2	RF	1.01	1.35	0.748148	-48.0402	23.1484
2	RF	0.99	1.355	0.730627	-51.5674	20.4873
2	RF	1.08	1.43	0.755245	-51.9455	16.6928
2	RF	1.015	1.545	0.656958	-51.6576	23.0371
2	RF	1.065	1.315	0.809886	-52.2658	20.021
2	RF	1.01	1.57	0.643312	-50.8456	20.9323
2	RF	1.015	1.35	0.751852	-49.7842	23.7351
2	RF	0.975	1.485	0.656566	-51.7954	24.1742
2	RF	1.09	1.535	0.710098	-54.984	20.5507
2	RF		1.39		-46.3488	26.9655
2	RF
2	RF	1.055	1.605	0.657321	-51.5838	23.3215
2	RF	1.17	1.565	0.747604	-50.5149	22.2144
2	RF	1.05	1.715	0.612245	-51.5944	20.8793
2	RF	1.065	1.25	0.852	-58.572	19.3238
2	RF	0.99	1.435	0.689895	-51.4349	22.2757
2	RF	0.97	1.4	0.692857	-53.9222	22.053
2	RF	1.02	1.435	0.710801	-48.6997	24.4471
2	RF	1.055	1.445	0.730104	-51.9877	23.2002
2	RF	1.275	1.57	0.812102	-48.9798	24.509
2	RF	1.255	1.76	0.713068	-35.3834	27.9185
2	RF	0.965	1.645	0.586626	-49.6271	23.0614
2	RF	0.945	1.425	0.663158	-54.8731	22.3538
2	RF	1.085	1.405	0.772242	-48.9282	23.4642
2	RF	1.05	1.51	0.695364	-50.7524	20.8262
2	RF	1.16	1.435	0.808362	-52.3967	21.5029
2	RF	1.1	1.525	0.721311	-51.7931	23.3026
2	RF	1.055	1.465	0.720137	-51.0978	22.0142
2	RF	0.99	1.465	0.675768	-50.1161	24.0071
2	RF	0.995	1.54	0.646104	-50.9479	23.9829
2	RF	1.005	1.32	0.761364	-48.8216	24.3533
2	RF	1.075	1.5	0.716667	-49.3487	24.5529
2	RF	1.115	1.51	0.738411	-49.0802	23.2105
2	RF	1.345	1.905	0.706037	-47.4854	19.9562
2	RF	1.145	1.565	0.731629	-39.1368	29.4313
2	RF	1.24	1.54	0.805195	-52.5323	20.6875
2	RF	1.235	1.595	0.774295	-47.1728	23.7094
2	RF	1.13	1.705	0.662757	-47.3601	22.1974
2	RF	1.105	1.535	0.71987	-51.9273	24.1065
2	RF	1.02	1.49	0.684564	-50.0709	23.4136
2	RF	1.03	1.45	0.710345	-48.1779	25.9084
2	RF	1.04	1.475	0.705085	-52.9931	21.0653
2	RF	1.055	1.63	0.647239	-49.3017	24.4885
2	RF	1.085	1.365	0.794872	-49.5017	24.6578
2	RF	1.22	1.535	0.794788	-50.2167	22.9424
2	RF	1.5	1.795	0.835655	-42.2128	28.0145
2	RF	1.82	2.29	0.79476	-41.1567	22.9107
2	RF	1.24	1.885	0.657825	-46.8257	20.4216
2	RF	1.715	2.19	0.783105	-40.3535	23.919
2	RF	1.195	1.685	0.709199	-47.3257	24.2594
2	RF		1.565		-52.707	22.4955
2	RF
2	RF	1.21	1.425	0.849123	-41.3829	27.6492
2	RF	0.895	1.47	0.608844	-52.2065	23.3965
2	RF	0.965	1.37	0.70438	-52.5794	24.8619
2	RF	1.01	1.42	0.711268	-49.9618	21.5619
2	RF	0.985	1.515	0.650165	-47.9296	23.0829
2	RF	0.885	1.275	0.694118	-48.7857	22.2113
2	RF	0.94	1.335	0.70412	-50.9655	23.4844
2	RF	0.935	1.54	0.607143	-51.2634	21.6007
2	RF	1.085	1.255	0.864542	-56.6902	22.0986
2	RF	1	1.445	0.692042	-52.4564	22.4519
2	RF	1.085	1.465	0.740614	-49.8853	23.4844
2	RF	1.05	1.49	0.704698	-52.822	21.4975
2	RF	1.02	1.475	0.691525	-51.0294	21.6614
2	RF	1.01	1.465	0.68942	-49.2606	24.0003
2	RF	0.995	1.45	0.686207	-50.831	23.4164
2	RF	0.935	1.43	0.653846	-51.0096	22.7353
2	RF	0.93	1.405	0.661922	-49.0812	23.5729
2	RF	0.935	1.51	0.619205	-52.7459	20.475
2	RF	0.94	1.24	0.758065	-54.0294	20.7556
2	RF	0.865	1.47	0.588435	-51.3512	19.9708
2	RF	0.95	1.365	0.695971	-49.6697	20.3453
2	RF	0.925	1.37	0.675182	-50.3352	22.8406
2	RF	0.99	1.365	0.725275	-50.9087	23.6281
2	RF	0.89	1.24	0.717742	-51.654	22.7661
2	RF	0.94	1.365	0.688645	-51.4104	23.7519
2	RF	0.91	1.355	0.671587	-51.1014	22.8451
2	RF	0.915	1.365	0.67033	-51.2193	21.2813
2	RF	1.53	1.475		-48.1626	20.544
2	RF	1.065	1.915	0.556136	-52.3559	15.8705
2	RF	1.06	1.4	0.757143	-50.5009	22.1139
2	RF	0.97	1.395	0.695341	-48.9897	22.562
2	RF	0.91	1.355	0.671587	-50.5185	23.5447
2	RF	0.86	1.44	0.597222	-52.4938	22.4978
2	RF	0.97	1.23	0.788618	-50.443	23
2	RF	0.89	1.48	0.601351	-53.1371	20.42
2	RF	0.995	1.385	0.718412	-48.346	23.461
2	RF	0.92	1.395	0.659498	-47.4615	22.8523
2	RF	0.965	1.275	0.756863	-49.4791	23.122
2	RF	0.9	1.505	0.598007	-51.5742	23.5994
2	RF	1.015	1.245	0.815261	-50.0583	25.3586
2	RF	0.88	1.475	0.59661	-51.0568	19.3975
2	RF		1.245		-52.8035	26.0533
2	RF
2	RF	1.19	1.415	0.840989	-43.177	29.8095
2	RF	1.07	1.495	0.715719	-49.9557	24.9443
2	RF	1.16	1.555	0.745981	-44.1733	28.1011
2	RF	0.935	1.525	0.613115	-50.1629	25.855
2	RF	0.995	1.355	0.734317	-46.9997	26.8763
2	RF	1.095	1.42	0.771127	-48.8523	24.2045
2	RF	1.05	1.51	0.695364	-50.1263	24.5277
2	RF	1.09	1.525	0.714754	-49.0555	26.845
2	RF	0.985	1.615	0.609907	-49.4984	26.2369
2	RF	1.155	1.355	0.852399	-47.4438	24.3265
2	RF	0.97	1.49	0.651007	-50.0654	22.9122
2	RF	0.95	1.395	0.681004	-48.091	23.9725
2	RF	1.08	1.415	0.763251	-48.529	24.8718
2	RF	0.96	1.52	0.631579	-52.2006	22.0691
2	RF	0.93	1.32	0.704545	-47.4512	26.3326
2	RF	0.955	1.335	0.715356	-50.7528	24.7411
2	RF	0.855	1.44	0.59375	-50.1979	25.8438
2	RF	0.78	1.3	0.6	-48.4437	27.3101
2	RF	0.895	1.235	0.724696	-51.4642	22.3171
2	RF	0.815	1.13	0.721239	-49.9384	22.63
2	RF	0.795	1.295	0.6139	-50.9146	23.4126
2	RF	0.79	1.185	0.666667	-50.5305	25.9386
2	RF	0.835	1.2	0.695833	-49.1904	25.0998
2	RF	0.86	1.235	0.696356	-51.4157	22.4133
2	RF	0.895	1.205	0.742739	-50.6981	22.6704
2	RF	0.93	1.325	0.701887	-51.1737	22.2761
2	RF	0.99	1.37	0.722628	-51.4818	21.2856
2	RF	0.99	1.355	0.730627	-50.3489	23.623
2	RF	0.995	1.36	0.731618	-50.6261	23.1778
2	RF	0.885	1.46	0.606164	-50.7628	23.1994
2	RF	0.92	1.225	0.75102	-46.3131	25.011
2	RF	0.965	1.365	0.70696	-54.0229	21.2731
2	RF	0.81	1.33	0.609023	-49.2738	24.3938
2	RF	0.965	1.365	0.70696	-50.6148	22.4565
2	RF	0.89	1.195	0.74477	-52.1789	21.7386
2	RF	1.025	1.385	0.740072	-49.2308	23.0915
2	RF	0.9	1.39	0.647482	-50.1865	24.4346
2	RF	1.035	1.365	0.758242	-51.4067	21.8112
2	RF	1.015	1.385	0.732852	-50.8368	21.7324
2	RF	0.94	1.525	0.616393	-48.5583	26.4163
2	RF	0.99	1.27	0.779528	-48.0412	25.6475
2	RF	0.905	1.41	0.641844	-50.4556	25.7521
2	RF	1.13	1.425	0.792982	-51.2422	22.8912
2	RF	1.095	1.475	0.742373	-50.6984	24.5084
2	RF		1.54		-50.7159	25.2122
2	RF
2	RF	0.705	1.375	0.512727	-45.6111	25.6623
2	RF	0.775	0.995	0.778894	-51.3206	22.2181
2	RF	0.995	1.255	0.792829	-44.8084	22.2862
2	RF	0.775	1.43	0.541958	-46.1852	27.9208
2	RF	0.95	1.185	0.801688	-47.9211	24.736
2	RF	0.995	1.39	0.715827	-50.4422	22.9209
2	RF	1.165	1.365	0.85348	-48.6544	20.0952
2	RF	1.19	1.53	0.777778	-50.1033	25.0186
2	RF	1.08	1.595	0.677116	-47.2452	27.1613
2	RF	1.22	1.615	0.755418	-49.7525	25.3716
2	RF	1.2	1.63	0.736196	-43.9635	28.2075
2	RF	1.205	1.82	0.662088	-45.6186	25.5201
2	RF	1.065	1.65	0.645455	-44.8885	26.5026
2	RF	1.135	1.55	0.732258	-43.9328	28.9949
2	RF	1.06	1.53	0.69281	-46.6004	27.2477
2	RF	0.99	1.5	0.66	-45.3984	26.5887
2	RF	1.05	1.36	0.772059	-51.4817	25.4548
2	RF	1.16	1.605	0.722741	-50.634	23.4658
2	RF	1.095	1.45	0.755172	-48.9472	26.351
2	RF	1.635	1.985	0.823678	-38.7846	13.1523
2	RF	1.1	1.525	0.721311	-43.8965	26.2303
2	RF	0.87	1.575	0.552381	-49.4304	27.9001
2	RF	0.85	1.31	0.648855	-49.0983	23.5073
2	RF	0.805	1.19	0.676471	-50.0968	28.7045
2	RF	0.81	1.19	0.680672	-53.8775	19.7403
2	RF	0.905	1.165	0.776824	-47.2451	24.86
2	RF	0.93	1.33	0.699248	-50.8937	24.2111
2	RF	0.925	1.365	0.677656	-51.1801	24.3635
2	RF	0.935	1.475	0.633898	-48.7004	24.867
2	RF	1	1.245	0.803213	-50.5012	24.0214
2	RF	0.935	1.41	0.663121	-51.3791	20.9819
2	RF	1.025	1.395	0.734767	-48.6077	22.4002
2	RF	1.155	1.41	0.819149	-49.3453	24.0313
2	RF	1.04	1.54	0.675325	-47.7372	24.546
2	RF	0.97	1.495	0.648829	-47.9044	25.2644
2	RF	0.925	1.355	0.682657	-51.9969	25.662
2	RF	1.025	1.39	0.73741	-49.0731	25.1416
2	RF		1.42		-48.7698	27.2639
2	RF
2	RF	0.965	1.43	0.674825	-53.8533	24.8919
2	RF	0.925	1.485	0.622896	-51.2434	25.6542
2	RF	0.915	1.22	0.75	-49.0001	26.8337
2	RF	0.9	1.415	0.636042	-50.5045	25.2691
2	RF	0.97	1.24	0.782258	-49.4557	25.1016
2	RF	0.925	1.37	0.675182	-49.8048	25.175
2	RF	0.905	1.46	0.619863	-51.4505	25.9495
2	RF	0.925	1.315	0.703422	-51.0427	24.2051
2	RF	0.995	1.265	0.786561	-52.414	24.58
2	RF	0.96	1.385	0.693141	-51.6623	24.0756
2	RF	0.865	1.475	0.586441	-50.2551	25.3525
2	RF	0.855	1.24	0.689516	-50.8559	26.1796
2	RF	0.905	1.28	0.707031	-52.7385	23.4247
2	RF	0.915	1.255	0.729084	-51.912	22.9108
2	RF	0.705	1.32	0.534091	-51.9049	26.2431
2	RF	0.79	1.12	0.705357	-51.4344	21.4158
2	RF	0.675	1.165	0.579399	-54.3821	23.2192
2	RF	0.86	1.135	0.757709	-47.4958	26.5816
2	RF	0.835	1.16	0.719828	-53.5901	22.4083
2	RF	0.8	1.35	0.592593	-50.613	24.5778
2	RF	0.83	1.185	0.700422	-51.8711	26.1337
2	RF	0.795	1.215	0.654321	-52.9868	23.9599
2	RF	0.71	1.19	0.596639	-53.6451	25.2078
2	RF	0.875	1.15	0.76087	-50.2988	24.8325
2	RF	0.73	1.24	0.58871	-52.3038	23.5634
2	RF	0.89	1.2	0.741667	-47.272	25.9667
2	RF	0.86	1.29	0.666667	-52.7505	23.3375
2	RF	0.88	1.165	0.755365	-51.7847	25.2294
2	RF	1	1.345	0.743494	-49.1524	22.7198
2	RF	0.93	1.445	0.643599	-53.0958	22.6819
2	RF	0.88	1.27	0.692913	-48.5068	25.0116
2	RF	0.82	1.245	0.658635	-53.6446	23.5227
2	RF	0.805	1.215	0.662551	-52.2681	26.6204
2	RF	0.8	1.245	0.64257	-51.7821	25.5327
2	RF	0.84	1.225	0.685714	-53.9782	24.0786
2	RF		1.185		-55.1932	22.7352
2	RF
2	RF	1.275	1.515	0.841584	-57.0677	21.3734
2	RF	1.065	1.695	0.628319	-42.3583	23.0818
2	RF	1.04	1.315	0.790875	-57.6426	17.2843
2	RF	1.14	1.545	0.737864	-46.5336	23.5226
2	RF	0.93	1.625	0.572308	-50.5521	26.0586
2	RF	1.12	1.265	0.885375	-47.3582	23.7446
2	RF	1.135	1.57	0.72293	-46.8156	25.998
2	RF	1.215	1.61	0.754658	-42.2244	26.9233
2	RF	1.245	1.67	0.745509	-47.2777	25.8632
2	RF	1.52	1.85	0.821622	-44.8277	23.1259
2	RF	1.45	2.01	0.721393	-46.4734	25.2135
2	RF	1.52	1.865	0.815013	-39.8624	22.2221
2	RF	1.265	1.9	0.665789	-41.7809	24.4715
2	RF	1.195	1.695	0.705015	-47.8785	24.5203
2	RF	1.385	1.63	0.849693	-45.1045	26.6094
2	RF	2.245	1.96		-43.4993	26.6706
2	RF	1.005	2.515	0.399602	-31.0277	27.5018
2	RF	1.34	1.565	0.85623	-45.6314	24.5369
2	RF	1.365	1.695	0.80531	-46.6449	24.4097
2	RF	1.315	1.76	0.747159	-45.3484	25.2599
2	RF	1.31	1.76	0.744318	-48.3505	25.2079
2	RF	1.225	1.85	0.662162	-43.3752	20.4828
2	RF	1.565	1.895	0.825858	-36.2335	24.6654
2	RF	1.51	1.995	0.756892	-49.6259	17.8796
2	RF	1.34	1.78	0.752809	-46.6313	22.5941
2	RF	1.27	1.805	0.703601	-42.1726	27.0665
2	RF	1.19	1.645	0.723404	-52.2801	22.3733
2	RF	1.165	1.58	0.737342	-46.7429	27.4261
2	RF	1.275	1.655	0.770393	-49.542	23.6536
2	RF	1.22	1.735	0.70317	-47.9573	23.3494
2	RF	1.06	1.63	0.650307	-50.4186	24.8499
2	RF	1.03	1.465	0.703072	-50.2426	24.7148
2	RF	1.045	1.445	0.723183	-50.1466	23.8131
2	RF	1.04	1.475	0.705085	-48.9496	24.1371
2	RF	1.12	1.52	0.736842	-48.6927	23.6979
2	RF	1.12	1.545	0.724919	-48.9107	22.7431
2	RF	1.085	1.555	0.697749	-48.2193	25.9618
2	RF	1.11	1.57	0.707006	-47.0211	26.2382
2	RF	1.09	1.55	0.703226	-49.8363	24.045
2	RF	1.04	1.52	0.684211	-51.4404	25.0502
2	RF	1.12	1.495	0.749164	-49.7487	23.3684
2	RF	1.015	1.485	0.683502	-51.3665	25.2375
2	RF	1.01	1.465	0.68942	-50.3691	22.9779
2	RF	1.165	1.495	0.779264	-50.3197	24.847
2	RF		1.58		-51.2393	21.3294
2	RF
2	LF	0.88	1.27	0.692913
2	LF	1.12	1.42	0.788732	-45.8686	20.242
2	LF	1.015	1.54	0.659091	-52.6338	21.1381
2	LF	1.115	1.575	0.707937	-51.5629	21.7148
2	LF	1.14	1.565	0.728435	-49.2359	20.4065
2	LF	0.905	1.595	0.567398	-48.8954	20.0028
2	LF	1.19	1.4	0.85	-52.8816	19.6148
2	LF	0.995	1.465	0.679181	-52.5311	20.9041
2	LF	0.995	1.45	0.686207	-51.1601	20.3325
2	LF	1.055	1.505	0.700997	-50.8128	20.3946
2	LF	1.04	1.52	0.684211	-46.2571	21.3236
2	LF	1.105	1.545	0.71521	-52.4455	22.5102
2	LF	1.085	1.615	0.671827	-46.4692	19.2396
2	LF	1.125	1.55	0.725806	-50.1131	19.9763
2	LF	1.005	1.495	0.672241	-49.8354	19.9783
2	LF	0.93	1.45	0.641379	-52.4781	20.2719
2	LF	1.015	1.485	0.683502	-51.3223	20.0547
2	LF	1.025	1.435	0.714286	-51.2704	20.0045
2	LF	1.08	1.475	0.732203	-53.2026	18.8759
2	LF	1	1.425	0.701754	-51.5149	18.7732
2	LF	1.075	1.44	0.746528	-53.771	18.0477
2	LF	0.915	1.405	0.651246	-51.9297	17.5783
2	LF	0.985	1.5	0.656667	-50.8168	19.5168
2	LF	1.065	1.31	0.812977	-52.8462	19.4153
2	LF	1.015	1.445	0.702422	-51.8205	17.6841
2	LF	1.125	1.525	0.737705	-50.2622	21.4692
2	LF	1.035	1.565	0.661342	-48.5307	18.7947
2	LF	0.995	1.59	0.625786	-41.404	23.7279
2	LF	1.085	1.365	0.794872	-53.9783	18.8319
2	LF	0.905	1.435	0.630662	-52.6022	20.9764
2	LF	1.045	1.35	0.774074	-52.4466	20.4018
2	LF	0.925	1.355	0.682657	-53.022	18.8208
2	LF	0.845	1.43	0.590909	-54.4163	18.0002
2	LF	1.105	1.545	0.71521	-46.8851	18.7718
2	LF	0.985	1.315	0.749049	-53.2463	19.4522
2	LF	1.015	1.57	0.646497	-49.3162	18.8519
2	LF	0.97	1.35	0.718519	-47.6163	20.1452
2	LF	0.995	1.485	0.670034	-53.9469	20.5523
2	LF	1.03	1.535	0.67101	-53.4847	19.0251
2	LF		1.39		-50.6749	18.7972
2	LF
2	LF	1.155	1.605	0.719626	-53.1979	21.2667
2	LF	1.04	1.565	0.664537	-53.663	17.8608
2	LF	1.025	1.715	0.597668	-51.7039	22.1679
2	LF	0.965	1.25	0.772	-54.7283	22.3819
2	LF	0.985	1.435	0.686411	-53.9571	17.9484
2	LF	0.97	1.4	0.692857	-48.9007	22.2575
2	LF	0.96	1.435	0.66899	-51.71	19.5022
2	LF	0.995	1.445	0.688581	-53.1336	19.3586
2	LF	1.08	1.57	0.687898	-51.7674	20.1157
2	LF	1.345	1.76	0.764205	-45.6375	14.9765
2	LF	1.23	1.645	0.74772	-51.6743	18.5246
2	LF	0.93	1.425	0.652632	-48.2407	20.5134
2	LF	0.955	1.405	0.679715	-49.5004	19.5905
2	LF	1	1.51	0.662252	-51.5133	19.7805
2	LF	0.985	1.435	0.686411	-54.8702	20.5422
2	LF	1.085	1.525	0.711475	-52.4378	15.9616
2	LF	1.065	1.465	0.726962	-54.9068	16.2215
2	LF	1.105	1.465	0.754266	-53.9058	18.3478
2	LF	0.945	1.54	0.613636	-53.4397	17.2552
2	LF	0.97	1.32	0.734848	-52.7027	20.2985
2	LF	1.085	1.5	0.723333	-51.9872	20.3379
2	LF	1.075	1.51	0.711921	-47.0579	19.8913
2	LF	1.25	1.905	0.656168	-43.8714	21.8978
2	LF	1.275	1.565	0.814696	-46.0299	17.5116
2	LF	1.05	1.54	0.681818	-44.2127	18.8055
2	LF	1.17	1.595	0.733542	-44.3949	17.242
2	LF	1.205	1.705	0.706745	-41.5857	23.3644
2	LF	1.065	1.535	0.693811	-47.7077	21.4895
2	LF	1.005	1.49	0.674497	-51.5959	17.1637
2	LF	0.99	1.45	0.682759	-53.9138	18.2069
2	LF	1.045	1.475	0.708475	-52.2922	21.3747
2	LF	1.015	1.63	0.622699	-50.1219	18.9488
2	LF	1.065	1.365	0.78022	-53.2222	21.6302
2	LF	1.025	1.535	0.667752	-49.2632	20.4428
2	LF	1.385	1.795	0.771588	-48.047	20.0611
2	LF	1.845	2.29	0.805677	-43.4058	23.9049
2	LF	1.185	1.885	0.628647	-37.7857	19.7212
2	LF	1.595	2.19	0.728311	-49.7656	18.8908
2	LF	1.225	1.685	0.727003	-41.8322	18.3061
2	LF		1.565		-48.0775	16.4565
2	LF
2	LF	1.07	1.425	0.750877	-38.3593	20.3728
2	LF	1.055	1.47	0.717687	-48.0052	20.5195
2	LF	0.9	1.37	0.656934	-56.0153	18.1325
2	LF	1.015	1.42	0.714789	-48.9576	20.4288
2	LF	0.91	1.515	0.60066	-52.0863	17.9973
2	LF	0.885	1.275	0.694118	-48.9361	21.14
2	LF	0.94	1.335	0.70412	-57.082	21.8981
2	LF	1	1.54	0.649351	-52.9626	18.7682
2	LF	0.945	1.255	0.752988	-53.0298	21.7065
2	LF	1.005	1.445	0.695502	-49.3121	17.9598
2	LF	1.005	1.465	0.686007	-50.45	23.0198
2	LF	0.91	1.49	0.610738	-50.3091	19.5273
2	LF	1.025	1.475	0.694915	-48.2142	21.9925
2	LF	1.015	1.465	0.692833	-50.0661	20.9733
2	LF	0.975	1.45	0.672414	-51.0079	22.2312
2	LF	0.975	1.43	0.681818	-52.7894	18.5669
2	LF	0.935	1.405	0.66548	-49.803	20.5908
2	LF	0.915	1.51	0.60596	-49.54	23.6573
2	LF	0.89	1.24	0.717742	-51.655	20.9899
2	LF	0.855	1.47	0.581633	-51.9215	21.0073
2	LF	0.865	1.365	0.6337	-53.0217	18.0056
2	LF	0.945	1.37	0.689781	-54.275	19.5113
2	LF	0.89	1.365	0.652015	-53.521	19.142
2	LF	0.925	1.24	0.745968	-54.8285	19.909
2	LF	0.93	1.365	0.681319	-56.3761	20.862
2	LF	0.91	1.355	0.671587	-54.0023	19.1249
2	LF	0.89	1.365	0.652015	-53.815	19.6871
2	LF	1.245	1.475	0.844068	-55.3719	19.8754
2	LF	0.985	1.915	0.51436	-41.2544	23.0021
2	LF	0.965	1.4	0.689286	-55.4449	12.4523
2	LF	0.98	1.395	0.702509	-53.9054	18.6787
2	LF	1.015	1.355	0.749077	-53.5384	18.2636
2	LF	0.875	1.44	0.607639	-55.028	18.6994
2	LF	0.915	1.23	0.743902	-50.3664	19.5051
2	LF	0.86	1.48	0.581081	-51.346	20.8862
2	LF	1.03	1.385	0.743682	-51.0986	19.0974
2	LF	0.895	1.395	0.641577	-52.2884	18.4403
2	LF	0.965	1.275	0.756863	-49.8431	20.0794
2	LF	0.96	1.505	0.637874	-52.8423	16.893
2	LF	0.865	1.245	0.694779	-54.3483	19.3313
2	LF	1.025	1.475	0.694915	-53.9143	19.3869
2	LF		1.245		-55.4639	20.1941
2	LF
2	LF	1.135	1.415	0.80212	-44.4903	14.6556
2	LF	1.09	1.495	0.729097	-54.78	18.3256
2	LF	1.14	1.555	0.733119	-56.1978	16.7806
2	LF	1.04	1.525	0.681967	-52.1029	18.6988
2	LF	1	1.355	0.738007	-57.7911	16.7806
2	LF	1.095	1.42	0.771127	-58.0308	18.3921
2	LF	0.955	1.51	0.63245	-52.9828	17.6085
2	LF	1.185	1.525	0.777049	-51.4934	16.1241
2	LF	0.955	1.615	0.591331	-53.0963	19.5047
2	LF	1.05	1.355	0.774908	-49.8894	19.9257
2	LF	1.06	1.49	0.711409	-52.07	17.2557
2	LF	0.89	1.395	0.637993	-50.2989	18.3298
2	LF	1	1.415	0.706714	-56.1512	17.6559
2	LF	1	1.52	0.657895	-56.2364	18.6583
2	LF	1.005	1.32	0.761364	-53.5648	17.8334
2	LF	0.935	1.335	0.700375	-56.924	17.803
2	LF	0.915	1.44	0.635417	-57.6165	17.4058
2	LF	0.885	1.3	0.680769	-56.9331	18.4295
2	LF	0.86	1.235	0.696356	-60.8954	16.4058
2	LF	0.825	1.13	0.730088	-57.8046	16.7064
2	LF	0.81	1.295	0.625483	-54.624	18.0056
2	LF	0.78	1.185	0.658228	-59.3012	17.6161
2	LF	0.855	1.2	0.7125	-53.3723	19.3416
2	LF	0.83	1.235	0.672065	-57.75	17.6732
2	LF	0.97	1.205	0.804979	-56.9537	18.1598
2	LF	0.82	1.325	0.618868	-54.2572	17.9789
2	LF	0.945	1.37	0.689781	-50.9459	19.3552
2	LF	0.975	1.355	0.719557	-50.637	18.094
2	LF	0.83	1.36	0.610294	-56.0965	16.9974
2	LF	0.93	1.46	0.636986	-50.9834	18.2989
2	LF	1.02	1.225	0.832653	-54.5037	17.6187
2	LF	0.825	1.365	0.604396	-53.0451	17.842
2	LF	0.975	1.33	0.733083	-52.5127	20.0127
2	LF	0.805	1.365	0.589744	-54.5233	21.2299
2	LF	0.865	1.195	0.723849	-51.4926	22.2538
2	LF	0.97	1.385	0.700361	-53.6762	17.8805
2	LF	1.01	1.39	0.726619	-55.2637	17.5975
2	LF	0.865	1.365	0.6337	-53.2903	18.8488
2	LF	0.985	1.385	0.711191	-51.4702	17.9892
2	LF	1.03	1.525	0.67541	-55.5421	17.0335
2	LF	1.035	1.27	0.814961	-55.9538	19.8701
2	LF	0.925	1.41	0.656028	-55.8329	18.8609
2	LF	0.995	1.425	0.698246	-53.0717	18.9161
2	LF	1.135	1.475	0.769492	-52.8531	18.3455
2	LF		1.54		-52.284	18.7385
2	LF
2	LF	0.81	1.375	0.589091	-49.3865	22.4317
2	LF	0.545	0.995	0.547739	-57.5857	16.8865
2	LF	1.1	1.255	0.876494	-57.8192	17.5054
2	LF	0.69	1.43	0.482517	-50.5479	20.6528
2	LF	0.93	1.185	0.78481	-53.1403	20.8351
2	LF	0.87	1.39	0.625899	-57.2015	16.6518
2	LF	1.165	1.365	0.85348	-41.6065	24.2075
2	LF	1.015	1.53	0.663399	-44.7932	19.1576
2	LF	1.14	1.595	0.714734	-51.952	19.8261
2	LF	1.235	1.615	0.764706	-55.3339	16.4488
2	LF	1.2	1.63	0.736196	-50.5684	17.1471
2	LF	1.27	1.82	0.697802	-54.3603	18.8312
2	LF	1.025	1.65	0.621212	-52.7315	19.3112
2	LF	1.26	1.55	0.812903	-52.0239	17.7651
2	LF	0.925	1.53	0.604575	-52.3773	20.0693
2	LF	1.08	1.5	0.72	-52.347	18.3909
2	LF	1.05	1.36	0.772059	-53.0929	18.0659
2	LF	1.1	1.605	0.685358	-53.3822	19.4689
2	LF	1.13	1.45	0.77931	-52.1219	17.6615
2	LF	1.635	1.985	0.823678	-55.9773	19.2081
2	LF	1.095	1.525	0.718033	-37.2592	17.5968
2	LF	0.93	1.575	0.590476	-56.2628	16.592
2	LF	0.875	1.31	0.667939	-57.6633	18.9065
2	LF	0.745	1.19	0.62605	-56.636	18.4789
2	LF	0.845	1.19	0.710084	-60.2062	17.2021
2	LF	0.945	1.165	0.811159	-55.353	17.087
2	LF	0.94	1.33	0.706767	-57.7413	16.5728
2	LF	0.96	1.365	0.703297	-52.2162	18.3349
2	LF	0.925	1.475	0.627119	-52.9784	17.9853
2	LF	1.07	1.245	0.859438	-53.8119	16.581
2	LF	0.75	1.41	0.531915	-50.0294	18.6101
2	LF	1.01	1.395	0.724014	-52.6179	19.8346
2	LF	0.94	1.41	0.666667	-51.0611	17.3788
2	LF	0.995	1.54	0.646104	-50.2797	16.8287
2	LF	1.06	1.495	0.70903	-49.7431	18.8597
2	LF	0.845	1.355	0.623616	-49.5295	17.7154
2	LF	0.985	1.39	0.708633	-51.5702	17.904
2	LF		1.42		-53.8944	19.6062
2	LF
2	LF	0.9	1.43	0.629371
2	LF	0.94	1.485	0.632997	-53.0625	19.065
2	LF	0.975	1.22	0.79918	-57.552	16.4584
2	LF	0.81	1.415	0.572438	-51.8681	19.0663
2	LF	1	1.24	0.806452	-54.3694	18.8192
2	LF	0.87	1.37	0.635036	-56.5363	19.2367
2	LF	0.965	1.46	0.660959	-55.8522	21.5318
2	LF	0.955	1.315	0.726236	-56.1782	19.3795
2	LF	0.89	1.265	0.703557	-57.0143	18.9805
2	LF	1.015	1.385	0.732852	-53.9397	20.2518
2	LF	0.86	1.475	0.583051	-55.1905	19.4985
2	LF	0.865	1.24	0.697581	-56.6354	20.961
2	LF	0.835	1.28	0.652344	-57.6306	19.0404
2	LF	1	1.255	0.796813	-53.6846	17.9582
2	LF	0.65	1.32	0.492424	-54.4893	21.7724
2	LF	0.77	1.12	0.6875	-57.3244	18.4803
2	LF	0.67	1.165	0.575107	-57.1656	20.6407
2	LF	0.755	1.135	0.665198	-54.9707	21.6309
2	LF	0.835	1.16	0.719828	-55.459	18.0023
2	LF	0.755	1.35	0.559259	-56.3583	21.4411
2	LF	0.85	1.185	0.7173	-52.9185	21.5823
2	LF	0.695	1.215	0.572016	-54.9417	19.2355
2	LF	0.825	1.19	0.693277	-57.702	22.042
2	LF	0.72	1.15	0.626087	-58.8906	19.1751
2	LF	0.795	1.24	0.641129	-52.8567	20.2482
2	LF	0.8	1.2	0.666667	-55.8521	19.5818
2	LF	0.795	1.29	0.616279	-54.9601	19.6911
2	LF	0.92	1.165	0.7897	-55.5729	20.2769
2	LF	0.895	1.345	0.665428	-57.5828	18.8566
2	LF	0.92	1.445	0.636678	-55.925	16.8853
2	LF	0.87	1.27	0.685039	-56.6923	18.6402
2	LF	0.88	1.245	0.706827	-58.0124	18.6812
2	LF	0.83	1.215	0.683128	-57.5834	20.009
2	LF	0.775	1.245	0.62249	-58.8999	19.6996
2	LF	0.79	1.225	0.644898	-56.9293	21.1919
2	LF		1.185		-54.5047	20.5419
2	LF
2	LF	0.99	1.515	0.653465
2	LF	1.21	1.695	0.713864	-40.8903	23.584
2	LF	0.715	1.315	0.543726	-47.7073	23.9764
2	LF	1.285	1.545	0.831715	-54.4569	20.6226
2	LF	0.985	1.625	0.606154	-48.0136	21.4206
2	LF	1.015	1.265	0.802372	-54.7002	19.2847
2	LF	1.225	1.57	0.780255	-51.043	17.8296
2	LF	1.055	1.61	0.65528	-50.689	19.9939
2	LF	1.15	1.67	0.688623	-43.4267	24.9583
2	LF	1.525	1.85	0.824324	-49.9985	20.4268
2	LF	1.35	2.01	0.671642	-45.2077	20.6707
2	LF	1.335	1.865	0.715818	-47.0534	20.4987
2	LF	1.42	1.9	0.747368	-40.2777	23.8817
2	LF	1.09	1.695	0.643068	-51.0736	15.9929
2	LF	1.355	1.63	0.831288	-54.4882	14.5075
2	LF	1.625	1.96	0.829082	-46.5986	16.8745
2	LF	1.675	2.515	0.666004	-45.6519	10.4036
2	LF	1.285	1.565	0.821086	-50.9487	17.7167
2	LF	1.34	1.695	0.79056	-46.1999	15.7199
2	LF	1.32	1.76	0.75	-47.3777	19.3131
2	LF	1.31	1.76	0.744318	-52.366	17.5192
2	LF	1.375	1.85	0.743243	-47.376	19.5696
2	LF	1.625	1.895	0.85752	-51.2594	16.2407
2	LF	1.26	1.995	0.631579	-48.8105	18.7866
2	LF	1.325	1.78	0.744382	-46.1761	22.3304
2	LF	1.335	1.805	0.739612	-54.3131	16.1896
2	LF	1.17	1.645	0.711246	-52.0861	17.6052
2	LF	1.185	1.58	0.75	-50.9615	17.2445
2	LF	1.245	1.655	0.752266	-52.1615	16.9293
2	LF	1.26	1.735	0.726225	-49.8861	16.6063
2	LF	1.205	1.63	0.739264	-50.3173	18.1036
2	LF	0.85	1.465	0.580205	-49.3087	15.7852
2	LF	1.1	1.445	0.761246	-50.8932	19.9164
2	LF	0.96	1.475	0.650847	-53.8078	14.222
2	LF	1.055	1.52	0.694079	-50.6745	18.4872
2	LF	0.99	1.545	0.640777	-48.2374	17.502
2	LF	1.105	1.555	0.710611	-47.6215	16.1662
2	LF	1.16	1.57	0.738854	-51.2002	15.5548
2	LF	1.15	1.55	0.741935	-48.6816	17.9537
2	LF	1.085	1.52	0.713816	-53.4758	17.0128
2	LF	1.07	1.495	0.715719	-52.2039	16.5577
2	LF	1.04	1.485	0.700337	-50.4988	17.5119
2	LF	1.05	1.465	0.716724	-52.7623	16.1276
2	LF	1.105	1.495	0.73913	-53.9309	18.4688
2	LF		1.58		-49.4238	18.2075
2	LF
3	LH	0.875	1.46	0.599315
3	LH	0.955	1.28	0.746094	-35.1495	11.534
3	LH	0.92	1.235	0.744939	-32.2549	17.9899
3	LH	0.995	1.315	0.756654	-33.8596	17.9191
3	LH	0.755	1.17	0.645299	-34.769	20.6117
3	LH	1.015	1.35	0.751852	-31.4223	21.9627
3	LH	0.855	1.265	0.675889	-36.2867	19.6793
3	LH	0.9	1.325	0.679245	-31.5436	24.3902
3	LH	0.76	1.195	0.635983	-34.867	21.5388
3	LH	0.735	1.165	0.630901	-34.4468	21.9807
3	LH	0.725	1.165	0.622318	-33.9899	25.4833
3	LH	0.68	1.095	0.621005	-35.8931	22.6345
3	LH	0.665	1.06	0.627358	-35.0685	24.2902
3	LH	0.645	1.045	0.617225	-36.6084	24.7012
3	LH	0.67	1.065	0.629108	-37.5348	25.249
3	LH	0.68	1.075	0.632558	-35.325	24.9271
3	LH	0.67	1.07	0.626168	-34.7977	25.9434
3	LH	0.69	1.09	0.633028	-36.3656	24.1445
3	LH	0.67	1.07	0.626168	-34.847	25.7905
3	LH	0.69	1.09	0.633028	-35.1602	25.9376
3	LH	0.745	1.145	0.650655	-34.8042	25.7858
3	LH	0.67	1.105	0.606335	-33.5177	26.3516
3	LH	0.685	1.08	0.634259	-34.1361	25.4148
3	LH	0.73	1.125	0.648889	-34.0539	26.0237
3	LH	0.71	1.105	0.642534	-34.4223	24.3596
3	LH	0.67	1.07	0.626168	-36.1508	22.285
3	LH	0.625	1.035	0.603865	-35.4461	25.4774
3	LH	0.69	1.085	0.635945	-35.9204	25.0211
3	LH	0.79	1.22	0.647541	-34.4723	27.682
3	LH	0.755	1.235	0.611336	-31.607	26.3019
3	LH	0.71	1.105	0.642534	-35.6737	20.0794
3	LH	0.725	1.12	0.647321	-35.18	25.8117
3	LH	0.74	1.15	0.643478	-34.2897	25.47
3	LH	0.735	1.155	0.636364	-34.4157	24.9158
3	LH	0.67	1.115	0.600897	-33.14	27.2298
3	LH	1.965	2.31	0.850649	-34.2814	19.6528
3	LH	0.88	1.315	0.669202	-16.3872	32.9655
3	LH	0.86	1.235	0.696356	-34.3192	19.9177
3	LH	0.705	1.175	0.6	-31.6416	27.0379
3	LH	0.705	1.13	0.623894	-37.9237	22.0214
3	LH	0.84	1.265	0.664032	-33.8628	26.922
3	LH	0.89	1.34	0.664179	-31.385	25.8744
3	LH				-33.4495	24.1988
3	LH	0.75	1.22	0.614754
3	LH	0.94	1.295	0.725869	-34.9035	21.6612
3	LH	1.005	1.355	0.741697	-36.3998	19.0267
3	LH	0.81	1.25	0.648	-39.7644	19.7019
3	LH	0.63	1.09	0.577982	-37.4805	23.6668
3	LH	0.98	1.31	0.748092	-34.0424	23.2586
3	LH	0.83	1.27	0.653543	-38.1745	22.175
3	LH	0.775	1.22	0.635246	-33.4957	25.1173
3	LH	1.39	1.75	0.794286	-32.5359	27.1528
3	LH	0.69	1.19	0.579832	-36.4307	22.0639
3	LH	1.1	1.42	0.774648	-33.4101	17.8319
3	LH	0.965	1.435	0.672474	-33.863	24.2981
3	LH	1.06	1.41	0.751773	-38.7836	18.6234
3	LH	0.9	1.315	0.684411	-38.1369	19.1761
3	LH	0.965	1.34	0.720149	-34.2932	22.4965
3	LH	0.73	1.14	0.640351	-37.2546	19.4887
3	LH	0.7	1.1	0.636364	-36.0601	25.19
3	LH	0.755	1.165	0.648069	-35.166	26.0027
3	LH	0.815	1.25	0.652	-33.8235	29.0147
3	LH	0.875	1.325	0.660377	-34.9627	24.3008
3	LH	1.205	1.69	0.713018	-31.7805	27.1653
3	LH	1.525	2.095	0.727924	-37.7778	12.7945
3	LH	1.465	2.01	0.728856	-34.6815	20.9197
3	LH	0.87	1.29	0.674419	-42.4668	21.0811
3	LH	1.21	1.6	0.75625	-45.2019	14.4126
3	LH	0.955	1.385	0.689531	-35.3834	19.7307
3	LH	0.735	1.165	0.630901	-35.8016	20.369
3	LH	0.725	1.16	0.625	-36.6587	25.3376
3	LH	0.76	1.18	0.644068	-37.2855	25.06
3	LH	0.795	1.225	0.64898	-34.9584	26.6713
3	LH	0.81	1.25	0.648	-34.964	26.9945
3	LH	0.81	1.265	0.640316	-35.1999	27.0765
3	LH				-35.8397	25.0454
3	LH	0.87	1.22	0.713115
3	LH	0.705	1.05	0.671429	-36.611	14.6346
3	LH	0.635	1.04	0.610577	-31.6049	26.478
3	LH	0.655	1.055	0.620853	-36.4077	24.6005
3	LH	0.705	1.105	0.638009	-35.8667	28.761
3	LH	0.68	1.09	0.623853	-35.8608	27.0749
3	LH	0.69	1.09	0.633028	-35.4732	26.9902
3	LH	0.665	1.07	0.621495	-36.4003	26.8434
3	LH	0.655	1.055	0.620853	-36.7446	27.4145
3	LH	0.615	1.01	0.608911	-36.9136	27.3076
3	LH	0.61	0.995	0.613065	-37.3158	26.8914
3	LH	0.655	1.05	0.62381	-38.8931	27.2907
3	LH	0.655	1.065	0.615023	-37.6508	27.8992
3	LH	0.705	1.095	0.643836	-36.8999	27.3532
3	LH	0.69	1.105	0.624434	-35.8074	27.1076
3	LH	0.675	1.085	0.62212	-35.728	27.2732
3	LH	0.655	1.05	0.62381	-36.0539	26.6876
3	LH	0.64	1.02	0.627451	-36.4353	27.5868
3	LH	0.645	1.03	0.626214	-38.4912	26.6803
3	LH	0.625	1.02	0.612745	-38.3106	27.0576
3	LH	0.59	0.98	0.602041	-37.8507	25.9827
3	LH	0.61	0.985	0.619289	-36.9619	26.5116
3	LH	0.645	1.03	0.626214	-37.2318	27.0068
3	LH	0.68	1.075	0.632558	-37.2297	27.3798
3	LH	0.68	1.09	0.623853	-35.7966	26.4543
3	LH	0.74	1.14	0.649123	-33.9543	26.0504
3	LH	0.775	1.205	0.643154	-33.2957	29.0574
3	LH	0.695	1.08	0.643519	-35.3475	24.3692
3	LH	0.665	1.06	0.627358	-37.2146	24.1539
3	LH	0.665	1.065	0.624413	-35.5093	28.7281
3	LH	0.68	1.075	0.632558	-37.0195	26.5163
3	LH	0.65	1.055	0.616114	-37.0476	26.4506
3	LH	0.655	1.055	0.620853	-36.7766	27.5296
3	LH	0.675	1.07	0.630841	-36.4258	27.8057
3	LH	0.72	1.11	0.648649	-35.4058	28.1405
3	LH	0.72	1.15	0.626087	-35.696	29.8563
3	LH				-34.1258	26.1935
3	LH	1.03	1.47	0.70068
3	LH	0.92	1.27	0.724409	-35.4636	19.2692
3	LH	0.87	1.215	0.716049	-38.7906	15.5575
3	LH	0.995	1.33	0.74812	-38.1018	18.6929
3	LH	1.155	1.61	0.717391	-38.2439	19.4322
3	LH	0.815	1.145	0.71179	-35.1106	24.6219
3	LH	0.9	1.195	0.753138	-41.938	15.3645
3	LH	0.69	1.09	0.633028	-40.8902	19.1808
3	LH	0.655	1.065	0.615023	-34.5972	24.7958
3	LH	0.675	1.08	0.625	-35.5115	25.3376
3	LH	0.77	1.19	0.647059	-35.7184	27.8381
3	LH	0.74	1.23	0.601626	-34.4973	29.1557
3	LH	0.88	1.29	0.682171	-37.2126	22.2802
3	LH	1.235	1.71	0.722222	-32.8068	27.1973
3	LH	0.7	1.37	0.510949	-24.5371	30.6232
3	LH	1.225	1.415	0.865724	-43.3648	17.0839
3	LH	0.885	1.355	0.653137	-34.6275	24.7514
3	LH	0.94	1.41	0.666667	-32.7206	23.5036
3	LH	0.53	0.97	0.546392	-32.4607	24.0718
3	LH	0.6	0.94	0.638298	-40.4055	19.7557
3	LH	0.665	1.065	0.624413	-37.0528	25.4129
3	LH	0.745	1.17	0.636752	-34.9991	28.7624
3	LH	0.905	1.35	0.67037	-34.8926	28.1273
3	LH	0.825	1.285	0.642023	-33.4609	26.4566
3	LH	1.255	1.73	0.725434	-35.9844	24.3478
3	LH	0.92	1.38	0.666667	-30.4061	24.8467
3	LH				-40.9468	16.3224
3	RH	0.925	1.46	0.633562	-39.486	28.8389
3	RH	0.95	1.28	0.742188	-31.6185	14.9934
3	RH	0.875	1.235	0.708502	-31.9309	20.754
3	RH	0.895	1.315	0.680608	-31.9532	19.5054
3	RH	1.005	1.17	0.858974	-31.0051	23.1817
3	RH	0.705	1.35	0.522222	-33.6115	22.1769
3	RH	0.96	1.265	0.758893	-31.4775	23.0576
3	RH	0.885	1.325	0.667925	-33.5089	23.7778
3	RH	0.9	1.195	0.753138	-38.3094	19.0874
3	RH	0.775	1.165	0.665236	-35.2072	24.7202
3	RH	0.675	1.165	0.579399	-32.5824	27.6355
3	RH	0.665	1.095	0.607306	-32.9666	25.2893
3	RH	0.66	1.06	0.622642	-34.0122	26.1587
3	RH	0.64	1.045	0.61244	-36.6089	23.949
3	RH	0.645	1.065	0.605634	-33.9859	24.502
3	RH	0.665	1.075	0.618605	-32.9884	26.816
3	RH	0.69	1.07	0.64486	-33.229	28.0744
3	RH	0.655	1.09	0.600917	-33.7684	25.9493
3	RH	0.675	1.07	0.630841	-32.746	26.5993
3	RH	0.685	1.09	0.62844	-32.2561	27.2013
3	RH	0.715	1.145	0.624454	-32.8612	26.5678
3	RH	0.68	1.105	0.615385	-32.564	23.2862
3	RH	0.715	1.08	0.662037	-33.5889	26.6753
3	RH	0.695	1.125	0.617778	-30.7112	27.4351
3	RH	0.64	1.105	0.579186	-33.4885	25.2493
3	RH	0.655	1.07	0.61215	-33.2548	28.8157
3	RH	0.65	1.035	0.628019	-33.6814	26.3191
3	RH	0.735	1.085	0.677419	-33.6212	27.9776
3	RH	0.87	1.22	0.713115	-30.0526	27.3831
3	RH	0.69	1.235	0.558704	-29.5979	28.2243
3	RH	0.7	1.105	0.633484	-32.2235	24.8294
3	RH	0.715	1.12	0.638393	-32.6737	25.0431
3	RH	0.7	1.15	0.608696	-31.783	27.1548
3	RH	0.805	1.155	0.69697	-32.6348	25.4853
3	RH	1.09	1.115	0.977578	-32.2027	27.6134
3	RH	1.315	2.31	0.569264	-18.3245	26.7625
3	RH	0.86	1.315	0.653992	-39.9024	21.5162
3	RH	0.8	1.235	0.647773	-37.7125	21.9753
3	RH	0.69	1.175	0.587234	-32.4548	30.1376
3	RH	0.805	1.13	0.712389	-33.2122	27.1022
3	RH	0.825	1.265	0.652174	-31.5038	27.9472
3	RH		1.34		-31.4601	27.7309
3	RH
3	RH	0.91	1.22	0.745902	-34.8874	19.9137
3	RH	0.945	1.295	0.72973	-34.5843	18.8469
3	RH	0.995	1.355	0.734317	-34.6771	21.7752
3	RH	0.64	1.25	0.512	-35.7584	20.5066
3	RH	0.92	1.09	0.844037	-32.5606	24.0185
3	RH	0.735	1.31	0.561069	-35.148	22.4377
3	RH	0.905	1.27	0.712598	-31.9928	25.2121
3	RH	1.145	1.22	0.938525	-33.9274	24.0605
3	RH	0.985	1.75	0.562857	-33.6637	21.304
3	RH	0.95	1.19	0.798319	-37.2867	25.6542
3	RH	1.05	1.42	0.739437	-34.9639	17.3517
3	RH	0.755	1.435	0.526132	-28.2443	27.2223
3	RH	0.965	1.41	0.684397	-31.7627	23.9203
3	RH	1.04	1.315	0.790875	-34.6054	21.0235
3	RH	0.71	1.34	0.529851	-35.907	19.7055
3	RH	0.665	1.14	0.583333	-33.3588	25.9549
3	RH	0.71	1.1	0.645455	-32.6304	24.8986
3	RH	0.765	1.165	0.656652	-31.9063	27.2855
3	RH	0.82	1.25	0.656	-30.216	27.8135
3	RH	1.03	1.325	0.777358	-31.3753	27.6226
3	RH	1.5	1.69	0.887574	-30.1228	25.523
3	RH	1.185	2.095	0.565632	-19.8349	24.8907
3	RH	1.565	2.01	0.778607	-26.9137	9.51698
3	RH	0.865	1.29	0.670543	-46.8344	6.24111
3	RH	1.055	1.6	0.659375	-28.8308	26.7915
3	RH	0.775	1.385	0.559567	-36.5054	15.3826
3	RH	0.735	1.165	0.630901	-33.5075	26.048
3	RH	0.735	1.16	0.633621	-31.5631	26.1049
3	RH	0.77	1.18	0.652542	-32.3233	25.9699
3	RH	0.785	1.225	0.640816	-30.1461	28.2287
3	RH	0.825	1.25	0.66	-32.5979	26.2583
3	RH		1.265		-32.8262	26.2347
3	RH
3	RH	0.635	1.22	0.520492
3	RH	0.71	1.05	0.67619	-31.3195	20.237
3	RH	0.655	1.04	0.629808	-33.4863	26.5766
3	RH	0.69	1.055	0.654028	-32.9076	26.6546
3	RH	0.665	1.105	0.60181	-33.1103	28.5563
3	RH	0.67	1.09	0.614679	-32.7692	27.0553
3	RH	0.66	1.09	0.605505	-32.9669	27.942
3	RH	0.66	1.07	0.616822	-33.1723	28.221
3	RH	0.62	1.055	0.587678	-34.2233	27.3727
3	RH	0.605	1.01	0.59901	-35.3522	28.4201
3	RH	0.625	0.995	0.628141	-36.0797	29.5174
3	RH	0.655	1.05	0.62381	-34.9455	29.1424
3	RH	0.655	1.065	0.615023	-33.9747	27.751
3	RH	0.695	1.095	0.634703	-33.2883	27.4372
3	RH	0.685	1.105	0.61991	-33.478	27.0767
3	RH	0.655	1.085	0.603687	-32.8833	27.6988
3	RH	0.62	1.05	0.590476	-33.7062	26.746
3	RH	0.64	1.02	0.627451	-34.141	29.2412
3	RH	0.62	1.03	0.601942	-35.8684	28.7833
3	RH	0.605	1.02	0.593137	-35.3938	27.2461
3	RH	0.61	0.98	0.622449	-35.4733	26.2381
3	RH	0.615	0.985	0.624365	-36.4521	26.9882
3	RH	0.65	1.03	0.631068	-34.8179	28.7002
3	RH	0.68	1.075	0.632558	-34.5187	27.4369
3	RH	0.705	1.09	0.646789	-32.7842	27.2811
3	RH	0.805	1.14	0.70614	-31.7543	26.3104
3	RH	0.615	1.205	0.510373	-29.4333	28.0905
3	RH	0.66	1.08	0.611111	-34.4585	25.1729
3	RH	0.685	1.06	0.646226	-34.1257	27.5154
3	RH	0.64	1.065	0.600939	-34.9207	27.167
3	RH	0.665	1.075	0.618605	-33.0735	29.1629
3	RH	0.66	1.055	0.625592	-35.3612	26.8139
3	RH	0.66	1.055	0.625592	-34.8123	29.7613
3	RH	0.66	1.07	0.616822	-33.7374	27.7506
3	RH	0.715	1.11	0.644144	-33.6062	27.8237
3	RH		1.15		-31.7877	27.9556
3	RH
3	RH	0.85	1.47	0.578231
3	RH	0.67	1.27	0.527559	-31.1329	25.3389
3	RH	0.865	1.215	0.711934	-30.1922	26.4572
3	RH	1.195	1.33	0.898496	-34.2747	22.2364
3	RH	0.875	1.61	0.543478	-26.743	23.3883
3	RH	0.58	1.145	0.50655	-36.409	23.3255
3	RH	0.68	1.195	0.569038	-30.9415	26.1402
3	RH	0.66	1.09	0.605505	-32.5018	25.7385
3	RH	0.69	1.065	0.647887	-33.3972	28.0671
3	RH	0.705	1.08	0.652778	-35.028	26.5223
3	RH	0.85	1.19	0.714286	-32.7963	27.1939
3	RH	0.73	1.23	0.593496	-30.3573	27.5536
3	RH	0.91	1.29	0.705426	-31.249	24.5645
3	RH	1.33	1.71	0.777778	-28.2272	24.6383
3	RH	0.565	1.37	0.412409	-31.996	31.5092
3	RH	1.065	1.415	0.75265	-16.5199	23.7813
3	RH	0.98	1.355	0.723247	-34.3531	17.1435
3	RH	0.695	1.41	0.492908	-30.4299	25.5794
3	RH	0.405	0.97	0.417526	-38.9593	22.2901
3	RH	0.83	0.94	0.882979	-34.1293	27.662
3	RH	0.71	1.065	0.666667	-42.065	20.1492
3	RH	0.825	1.17	0.705128	-31.3256	28.1988
3	RH	0.805	1.35	0.596296	-30.2846	28.9448
3	RH	0.915	1.285	0.712062	-33.6181	25.8336
3	RH	1.22	1.73	0.705202	-25.4082	26.9785
3	RH		1.38		-37.6164	16.3277
3	RH
3	RF	0.815	1.46	0.558219	-35.9177	17.2058
3	RF	0.885	1.28	0.691406	-35.9567	19.942
3	RF	0.84	1.235	0.680162	-35.719	24.759
3	RF	0.825	1.315	0.627376	-37.0954	22.7577
3	RF	0.91	1.17	0.777778	-38.7783	24.2999
3	RF	0.82	1.35	0.607407	-41.792	23.152
3	RF	0.92	1.265	0.727273	-36.4255	24.565
3	RF	0.74	1.325	0.558491	-39.9783	25.7191
3	RF	0.77	1.195	0.644351	-35.6975	27.2085
3	RF	0.815	1.165	0.699571	-39.494	26.2776
3	RF	0.745	1.165	0.639485	-40.3392	24.3564
3	RF	0.735	1.095	0.671233	-36.9816	26.5442
3	RF	0.72	1.06	0.679245	-40.5868	25.8986
3	RF	0.645	1.045	0.617225	-42.7925	25.6139
3	RF	0.695	1.065	0.652582	-40.9448	27.0991
3	RF	0.725	1.075	0.674419	-40.0828	25.8623
3	RF	0.725	1.07	0.67757	-41.0171	26.3923
3	RF	0.685	1.09	0.62844	-42.7154	23.0924
3	RF	0.67	1.07	0.626168	-41.9646	26.2622
3	RF	0.775	1.09	0.711009	-40.8537	25.9756
3	RF	0.645	1.145	0.563319	-43.5969	20.6717
3	RF	0.72	1.105	0.651584	-39.198	26.2249
3	RF	0.69	1.08	0.638889	-41.5738	25.8969
3	RF	0.755	1.125	0.671111	-42.8706	27.9839
3	RF	0.705	1.105	0.638009	-40.881	27.1391
3	RF	0.725	1.07	0.67757	-42.2063	25.5031
3	RF	0.65	1.035	0.628019	-41.8492	27.5623
3	RF	0.77	1.085	0.709677	-41.5801	25.4801
3	RF	0.89	1.22	0.729508	-42.7382	24.8067
3	RF	0.725	1.235	0.587045	-39.7484	24.7107
3	RF	0.715	1.105	0.647059	-39.9968	26.3135
3	RF	0.685	1.12	0.611607	-43.1941	23.9621
3	RF	0.715	1.15	0.621739	-40.1088	26.0097
3	RF	0.825	1.155	0.714286	-41.5418	25.9041
3	RF	1.83	1.115		-40.0476	28.3408
3	RF	0.885	2.31	0.383117	-28.9959	30.7721
3	RF	0.8	1.315	0.608365	-35.8682	29.0012
3	RF	0.81	1.235	0.65587	-38.0548	29.869
3	RF	0.78	1.175	0.66383	-39.7545	27.1841
3	RF	0.835	1.13	0.738938	-39.5015	28.4914
3	RF	0.835	1.265	0.660079	-37.2515	25.7539
3	RF		1.34		-36.766	28.0002
3	RF
3	RF	0.83	1.22	0.680328	-36.5836	23.9971
3	RF	0.82	1.295	0.633205	-37.7249	24.29
3	RF	0.875	1.355	0.645756	-36.1635	28.4334
3	RF	0.77	1.25	0.616	-37.5913	25.3472
3	RF	0.84	1.09	0.770642	-35.6786	27.6439
3	RF	0.895	1.31	0.683206	-40.3653	26.2436
3	RF	0.9	1.27	0.708661	-37.8247	25.6928
3	RF	1.195	1.22	0.979508	-38.5846	27.0843
3	RF	0.845	1.75	0.482857	-31.5188	27.0746
3	RF	0.88	1.19	0.739496	-33.0489	27.1206
3	RF	1.07	1.42	0.753521	-35.4612	27.1077
3	RF	0.885	1.435	0.616725	-38.0227	24.462
3	RF	0.89	1.41	0.631206	-34.028	29.5154
3	RF	0.855	1.315	0.65019	-38.3624	24.5689
3	RF	0.805	1.34	0.600746	-36.0328	27.538
3	RF	0.735	1.14	0.644737	-38.6359	27.5572
3	RF	0.79	1.1	0.718182	-38.7533	27.6436
3	RF	0.775	1.165	0.665236	-40.4044	24.361
3	RF	0.91	1.25	0.728	-37.3754	25.1477
3	RF	1.045	1.325	0.788679	-39.4754	25.437
3	RF	1.745	1.69		-36.276	23.4477
3	RF	1.825	2.095	0.871122	-34.1874	21.1909
3	RF	0.82	2.01	0.40796	-31.9886	31.5671
3	RF	1.12	1.29	0.868217	-33.7151	27.6718
3	RF	1.025	1.6	0.640625	-33.6546	26.2427
3	RF	0.75	1.385	0.541516	-38.0378	27.0163
3	RF	0.815	1.165	0.699571	-38.1344	28.2857
3	RF	0.795	1.16	0.685345	-38.8984	25.8193
3	RF	0.855	1.18	0.724576	-38.4104	25.2825
3	RF	0.86	1.225	0.702041	-39.0427	25.55
3	RF	0.87	1.25	0.696	-40.1811	25.9796
3	RF		1.265		-35.9047	30.4474
3	RF
3	RF	0.735	1.22	0.602459
3	RF	0.695	1.05	0.661905	-40.5143	26.8623
3	RF	0.755	1.04	0.725962	-38.3986	29.0282
3	RF	0.715	1.055	0.677725	-43.8479	26.7537
3	RF	0.72	1.105	0.651584	-41.8914	25.8341
3	RF	0.695	1.09	0.637615	-40.1839	26.0905
3	RF	0.74	1.09	0.678899	-41.6682	26.2124
3	RF	0.655	1.07	0.61215	-41.9049	25.7509
3	RF	0.635	1.055	0.601896	-40.8999	27.7558
3	RF	0.67	1.01	0.663366	-42.4572	27.7459
3	RF	0.645	0.995	0.648241	-42.9465	27.4233
3	RF	0.655	1.05	0.62381	-43.6295	26.9371
3	RF	0.74	1.065	0.694836	-39.5885	28.0042
3	RF	0.695	1.095	0.634703	-41.8023	25.9528
3	RF	0.695	1.105	0.628959	-41.5075	26.5005
3	RF	0.73	1.085	0.672811	-41.7333	26.2781
3	RF	0.625	1.05	0.595238	-42.9877	26.1723
3	RF	0.655	1.02	0.642157	-40.7087	28.7939
3	RF	0.58	1.03	0.563107	-42.327	27.1587
3	RF	0.675	1.02	0.661765	-42.7671	25.6861
3	RF	0.565	0.98	0.576531	-44.7593	25.1289
3	RF	0.655	0.985	0.664975	-42.4886	27.6099
3	RF	0.725	1.03	0.703883	-43.7222	25.6067
3	RF	0.65	1.075	0.604651	-41.8279	26.1799
3	RF	0.79	1.09	0.724771	-39.6398	25.6877
3	RF	0.805	1.14	0.70614	-40.8277	25.591
3	RF	0.645	1.205	0.53527	-39.0508	24.7893
3	RF	0.775	1.08	0.717593	-39.8584	29.1537
3	RF	0.64	1.06	0.603774	-42.1189	26.6981
3	RF	0.755	1.065	0.70892	-38.9838	28.1402
3	RF	0.635	1.075	0.590698	-42.3291	26.5155
3	RF	0.68	1.055	0.64455	-37.6536	30.68
3	RF	0.64	1.055	0.606635	-41.2263	28.6054
3	RF	0.645	1.07	0.602804	-42.0945	25.3159
3	RF	0.785	1.11	0.707207	-40.5218	25.9777
3	RF		1.15		-40.7555	26.0176
3	RF
3	RF	0.865	1.47	0.588435
3	RF	0.905	1.27	0.712598	-35.669	28.4865
3	RF	0.805	1.215	0.662551	-40.2409	23.7996
3	RF	1.35	1.33		-36.8862	29.1896
3	RF	0.725	1.61	0.450311	-31.3712	28.3311
3	RF	0.73	1.145	0.637555	-34.6767	28.8432
3	RF	0.775	1.195	0.648536	-38.871	28.0381
3	RF	0.715	1.09	0.655963	-39.0826	25.7606
3	RF	0.74	1.065	0.694836	-39.6744	28.126
3	RF	0.725	1.08	0.671296	-42.0132	25.1005
3	RF	0.9	1.19	0.756303	-39.1832	28.3762
3	RF	0.74	1.23	0.601626	-39.7548	23.1431
3	RF	1.08	1.29	0.837209	-38.161	26.4996
3	RF	1.065	1.71	0.622807	-37.7456	25.76
3	RF	0.85	1.37	0.620438	-38.1665	11.5544
3	RF	0.95	1.415	0.671378	-37.0647	26.0595
3	RF	1.07	1.355	0.789668	-37.0591	25.6901
3	RF	0.705	1.41	0.5	-35.834	30.0503
3	RF	0.525	0.97	0.541237	-37.3643	29.0154
3	RF	0.68	0.94	0.723404	-44.2968	24.1186
3	RF	0.8	1.065	0.751174	-41.8306	23.961
3	RF	0.915	1.17	0.782051	-41.8581	25.9292
3	RF	0.84	1.35	0.622222	-35.1788	28.9608
3	RF	1.275	1.285	0.992218	-35.9878	30.406
3	RF	0.91	1.73	0.526012	-26.3805	25.4755
3	RF		1.38		-37.4037	23.7912
3	RF
3	LF	0.885	1.46	0.606164
3	LF	0.92	1.28	0.71875	-38.7312	20.1988
3	LF	0.79	1.235	0.639676	-43.6951	21.9139
3	LF	0.895	1.315	0.680608	-41.8324	21.7742
3	LF	0.815	1.17	0.696581	-43.0236	23.4832
3	LF	0.85	1.35	0.62963	-40.1393	25.935
3	LF	0.9	1.265	0.711462	-42.486	25.8809
3	LF	0.835	1.325	0.630189	-34.6828	28.8396
3	LF	0.76	1.195	0.635983	-41.0047	27.0801
3	LF	0.735	1.165	0.630901	-41.7382	26.3223
3	LF	0.745	1.165	0.639485	-40.4038	26.7919
3	LF	0.68	1.095	0.621005	-43.4611	26.6677
3	LF	0.69	1.06	0.650943	-43.6152	26.9791
3	LF	0.645	1.045	0.617225	-43.8356	28.8382
3	LF	0.71	1.065	0.666667	-43.39	27.615
3	LF	0.665	1.075	0.618605	-45.0366	28.509
3	LF	0.715	1.07	0.668224	-42.9476	26.3153
3	LF	0.665	1.09	0.610092	-43.8631	27.4127
3	LF	0.71	1.07	0.663551	-46.1037	26.7596
[truncated: 11,777 more rows]

## Sheet: bipedal parameters
cow_nr	limb	Var3	Var4
1	LF-RH	0.095	1.28
1	LF-RH	0.14	1.305
1	LF-RH	0.12	1.41
1	LF-RH	0.14	1.3
1	LF-RH	0.13	1.44
1	LF-RH	0.13	1.28
1	LF-RH	0.12	1.35
1	LF-RH	0.165	1.52
1	LF-RH	0.115	1.23
1	LF-RH	0.175	1.2
1	LF-RH	0.19	1.22
1	LF-RH	0.105	1.47
1	LF-RH	0.155	1.24
1	LF-RH	0.145	1.35
1	LF-RH	0.14	1.445
1	LF-RH	0.185	1.3
1	LF-RH	0.135	1.49
1	LF-RH	0.105	1.445
1	LF-RH	0.1	1.315
1	LF-RH	0.125	1.355
1	LF-RH	0.1	1.465
1	LF-RH	0.14	1.425
1	LF-RH	0.165	1.305
1	LF-RH	0.14	1.165
1	LF-RH	0.155	1.37
1	LF-RH	0.14	1.37
1	LF-RH	0.175	1.27
1	LF-RH	0.155	1.355
1	LF-RH	0.145	1.495
1	LF-RH		0
1	LF-RH	0.06	1.415
1	LF-RH	0.105	1.465
1	LF-RH	0.12	1.265
1	LF-RH	0.095	1.3
1	LF-RH	0.155	1.195
1	LF-RH	0.135	1.21
1	LF-RH	0.12	1.23
1	LF-RH	0.125	1.13
1	LF-RH	0.135	1.15
1	LF-RH	0.145	1.245
1	LF-RH	0.12	1.36
1	LF-RH	0.145	1.55
1	LF-RH	0.135	1.645
1	LF-RH	0.065	1.64
1	LF-RH	0.05	1.545
1	LF-RH	0.055	1.475
1	LF-RH	0.175	1.385
1	LF-RH	0.175	1.43
1	LF-RH	0.165	1.41
1	LF-RH	0.16	1.35
1	LF-RH	0.15	1.315
1	LF-RH	0.155	1.365
1	LF-RH	0.15	1.425
1	LF-RH	0.09	1.675
1	LF-RH		0
1	LF-RH		1.255
1	LF-RH	0.12	1.09
1	LF-RH	0.165	1.13
1	LF-RH	0.14	1.175
1	LF-RH	0.155	1.15
1	LF-RH	0.13	1.16
1	LF-RH	0.14	1.2
1	LF-RH	0.135	1.23
1	LF-RH	0.14	1.26
1	LF-RH	0.145	1.2
1	LF-RH	0.145	1.19
1	LF-RH	0.135	1.215
1	LF-RH	0.145	1.265
1	LF-RH	0.125	1.235
1	LF-RH	0.12	1.185
1	LF-RH	0.085	1.445
1	LF-RH	0.115	1.09
1	LF-RH	0.105	1.27
1	LF-RH	0.13	1.26
1	LF-RH	0.14	1.16
1	LF-RH	0.125	1.195
1	LF-RH	0.14	1.235
1	LF-RH	0.15	1.255
1	LF-RH	0.135	1.245
1	LF-RH	0.15	1.225
1	LF-RH	0.155	1.215
1	LF-RH	0.145	1.32
1	LF-RH	0.12	2.035
1	LF-RH	0.075	1.35
1	LF-RH	0.1	1.43
1	LF-RH	0.14	1.59
1	LF-RH	0.1	1.605
1	LF-RH	0.16	1.25
1	LF-RH	0.15	1.57
1	LF-RH	0.145	1.37
1	LF-RH	0.15	1.275
1	LF-RH	0.105	1.325
1	LF-RH	0.145	1.345
1	LF-RH	0.145	1.26
1	LF-RH	0.145	1.325
1	LF-RH	0.145	1.135
1	LF-RH		0
1	RF-LH	0.015	1.28
1	RF-LH	0.11	1.305
1	RF-LH	0.085	1.41
1	RF-LH	0.085	1.3
1	RF-LH	0.125	1.44
1	RF-LH	0.135	1.28
1	RF-LH	0.16	1.35
1	RF-LH	0.165	1.52
1	RF-LH	0.13	1.23
1	RF-LH	0.155	1.2
1	RF-LH	0.15	1.22
1	RF-LH	0.175	1.47
1	RF-LH	0.155	1.24
1	RF-LH	0.185	1.35
1	RF-LH	0.145	1.445
1	RF-LH	0.14	1.3
1	RF-LH	0.19	1.49
1	RF-LH	0.205	1.445
1	RF-LH	0.175	1.315
1	RF-LH	0.175	1.355
1	RF-LH	0.21	1.465
1	RF-LH	0.125	1.425
1	RF-LH	0.09	1.305
1	RF-LH	0.165	1.165
1	RF-LH	0.175	1.37
1	RF-LH	0.17	1.37
1	RF-LH	0.18	1.27
1	RF-LH	0.175	1.355
1	RF-LH	0.175	1.495
1	RF-LH		0
1	RF-LH	0.035	1.415
1	RF-LH	0.11	1.465
1	RF-LH	0.11	1.265
1	RF-LH	0.095	1.3
1	RF-LH	0.13	1.195
1	RF-LH	0.12	1.21
1	RF-LH	0.095	1.23
1	RF-LH	0.09	1.13
1	RF-LH	0.1	1.15
1	RF-LH	0.14	1.245
1	RF-LH	0.08	1.36
1	RF-LH	0.145	1.55
1	RF-LH	0.16	1.645
1	RF-LH	0.075	1.64
1	RF-LH	0.02	1.545
1	RF-LH	0.075	1.475
1	RF-LH	0.085	1.385
1	RF-LH	0.16	1.43
1	RF-LH	0.185	1.41
1	RF-LH	0.18	1.35
1	RF-LH	0.185	1.315
1	RF-LH	0.2	1.365
1	RF-LH	0.17	1.425
1	RF-LH	0.11	1.675
1	RF-LH		0
1	RF-LH		1.255
1	RF-LH	0.02	1.09
1	RF-LH	0.135	1.13
1	RF-LH	0.15	1.175
1	RF-LH	0.165	1.15
1	RF-LH	0.18	1.16
1	RF-LH	0.115	1.2
1	RF-LH	0.13	1.23
1	RF-LH	0.18	1.26
1	RF-LH	0.17	1.2
1	RF-LH	0.11	1.19
1	RF-LH	0.14	1.215
1	RF-LH	0.125	1.265
1	RF-LH	0.195	1.235
1	RF-LH	0.14	1.185
1	RF-LH	0.09	1.445
1	RF-LH	0.025	1.09
1	RF-LH	0.135	1.27
1	RF-LH	0.145	1.26
1	RF-LH	0.12	1.16
1	RF-LH	0.08	1.195
1	RF-LH	0.145	1.235
1	RF-LH	0.115	1.255
1	RF-LH	0.135	1.245
1	RF-LH	0.16	1.225
1	RF-LH	0.155	1.215
1	RF-LH	0.155	1.32
1	RF-LH	0.14	2.035
1	RF-LH		1.35
1	RF-LH	0.135	1.43
1	RF-LH	0.18	1.59
1	RF-LH	0.13	1.605
1	RF-LH	0.12	1.25
1	RF-LH	0.17	1.57
1	RF-LH	0.145	1.37
1	RF-LH	0.165	1.275
1	RF-LH	0.11	1.325
1	RF-LH	0.155	1.345
1	RF-LH	0.13	1.26
1	RF-LH	0.095	1.325
1	RF-LH	0.145	1.135
1	RF-LH		0
1	RF-RH	0.12	1.28
1	RF-RH	0.04	1.305
1	RF-RH	0.13	1.41
1	RF-RH	0.045	1.3
1	RF-RH	0.14	1.44
1	RF-RH	0.12	1.28
1	RF-RH	0.14	1.35
1	RF-RH	0.115	1.52
1	RF-RH	0.12	1.23
1	RF-RH	0.12	1.2
1	RF-RH	0.05	1.22
1	RF-RH	0.155	1.47
1	RF-RH	0.14	1.24
1	RF-RH	0.03	1.35
1	RF-RH	0.125	1.445
1	RF-RH	0.03	1.3
1	RF-RH	0.12	1.49
1	RF-RH	0.085	1.445
1	RF-RH	0.055	1.315
1	RF-RH	0.055	1.355
1	RF-RH	0.045	1.465
1	RF-RH	0.135	1.425
1	RF-RH	0.115	1.305
1	RF-RH	0.035	1.165
1	RF-RH	0.245	1.37
1	RF-RH	0.16	1.37
1	RF-RH	0.135	1.27
1	RF-RH	0.185	1.355
1	RF-RH		1.495
1	RF-RH		0
1	RF-RH	0.14	1.415
1	RF-RH	0.045	1.465
1	RF-RH	0.04	1.265
1	RF-RH	0.11	1.3
1	RF-RH	0.04	1.195
1	RF-RH	0.035	1.21
1	RF-RH	0.095	1.23
1	RF-RH	0.09	1.13
1	RF-RH	0.035	1.15
1	RF-RH	0.11	1.245
1	RF-RH	0.02	1.36
1	RF-RH	0.155	1.55
1	RF-RH	0.12	1.645
1	RF-RH	0.15	1.64
1	RF-RH	0.145	1.545
1	RF-RH	0.125	1.475
1	RF-RH	0.13	1.385
1	RF-RH	0.12	1.43
1	RF-RH	0.115	1.41
1	RF-RH	0.12	1.35
1	RF-RH	0.125	1.315
1	RF-RH	0.175	1.365
1	RF-RH	0.19	1.425
1	RF-RH	0.16	1.675
1	RF-RH		0
1	RF-RH	0.155	1.255
1	RF-RH	0.135	1.09
1	RF-RH	0.135	1.13
1	RF-RH	0.14	1.175
1	RF-RH	0.125	1.15
1	RF-RH	0.12	1.16
1	RF-RH	0.165	1.2
1	RF-RH	0.125	1.23
1	RF-RH	0.145	1.26
1	RF-RH	0.125	1.2
1	RF-RH	0.13	1.19
1	RF-RH	0.13	1.215
1	RF-RH	0.135	1.265
1	RF-RH	0.14	1.235
1	RF-RH	0.07	1.185
1	RF-RH	0.17	1.445
1	RF-RH	0.04	1.09
1	RF-RH	0.13	1.27
1	RF-RH	0.135	1.26
1	RF-RH	0.115	1.16
1	RF-RH	0.165	1.195
1	RF-RH	0.12	1.235
1	RF-RH	0.145	1.255
1	RF-RH	0.19	1.245
1	RF-RH	0.14	1.225
1	RF-RH	0.17	1.215
1	RF-RH	0.155	1.32
1	RF-RH	0.105	2.035
1	RF-RH	0.06	1.35
1	RF-RH	0.145	1.43
1	RF-RH	0.175	1.59
1	RF-RH	0.16	1.605
1	RF-RH	0.04	1.25
1	RF-RH	0.16	1.57
1	RF-RH	0.13	1.37
1	RF-RH	0.135	1.275
1	RF-RH	0.15	1.325
1	RF-RH	0.145	1.345
1	RF-RH	0.045	1.26
1	RF-RH	0.135	1.325
1	RF-RH	0.125	1.135
1	RF-RH		0
1	LF-LH	0.11	1.28
1	LF-LH	0.175	1.305
1	LF-LH	0.165	1.41
1	LF-LH	0.035	1.3
1	LF-LH	0.16	1.44
1	LF-LH	0.175	1.28
1	LF-LH	0.175	1.35
1	LF-LH	0.17	1.52
1	LF-LH	0.165	1.23
1	LF-LH	0.15	1.2
1	LF-LH	0.155	1.22
1	LF-LH	0.265	1.47
1	LF-LH	0.13	1.24
1	LF-LH	0.045	1.35
1	LF-LH	0.165	1.445
1	LF-LH	0.205	1.3
1	LF-LH	0.16	1.49
1	LF-LH	0.06	1.445
1	LF-LH	0.045	1.315
1	LF-LH	0.02	1.355
1	LF-LH	0.175	1.465
1	LF-LH	0.035	1.425
1	LF-LH	0.125	1.305
1	LF-LH	0.14	1.165
1	LF-LH	0.115	1.37
1	LF-LH	0.03	1.37
1	LF-LH	0.11	1.27
1	LF-LH	0.135	1.355
1	LF-LH	0.14	1.495
1	LF-LH		0
1	LF-LH	0.02	1.415
1	LF-LH	0.055	1.465
1	LF-LH	0.09	1.265
1	LF-LH	0.09	1.3
1	LF-LH	0.105	1.195
1	LF-LH	0.105	1.21
1	LF-LH	0.03	1.23
1	LF-LH	0.03	1.13
1	LF-LH	0.04	1.15
1	LF-LH	0.03	1.245
1	LF-LH	0.03	1.36
1	LF-LH	0.035	1.55
1	LF-LH	0.04	1.645
1	LF-LH	0.07	1.64
1	LF-LH	0.07	1.545
1	LF-LH	0.2	1.475
1	LF-LH	0.13	1.385
1	LF-LH	0.14	1.43
1	LF-LH	0.055	1.41
1	LF-LH	0.04	1.35
1	LF-LH	0.165	1.315
1	LF-LH	0.145	1.365
1	LF-LH	0.145	1.425
1	LF-LH	0.17	1.675
1	LF-LH		0
1	LF-LH	0.085	1.255
1	LF-LH	0.115	1.09
1	LF-LH	0.145	1.13
1	LF-LH	0.13	1.175
1	LF-LH	0.14	1.15
1	LF-LH	0.15	1.16
1	LF-LH	0.13	1.2
1	LF-LH	0.16	1.23
1	LF-LH	0.15	1.26
1	LF-LH	0.13	1.2
1	LF-LH	0.14	1.19
1	LF-LH	0.13	1.215
1	LF-LH	0.135	1.265
1	LF-LH	0.035	1.235
1	LF-LH	0.025	1.185
1	LF-LH	0.175	1.445
1	LF-LH	0.12	1.09
1	LF-LH	0.15	1.27
1	LF-LH	0.135	1.26
1	LF-LH	0.1	1.16
1	LF-LH	0.125	1.195
1	LF-LH	0.12	1.235
1	LF-LH	0.125	1.255
1	LF-LH	0.135	1.245
1	LF-LH	0.14	1.225
1	LF-LH	0.135	1.215
1	LF-LH	0.155	1.32
1	LF-LH	0.23	2.035
1	LF-LH	0.205	1.35
1	LF-LH	0.175	1.43
1	LF-LH	0.225	1.59
1	LF-LH	0.175	1.605
1	LF-LH	0.13	1.25
1	LF-LH	0.14	1.57
1	LF-LH	0.155	1.37
1	LF-LH	0.145	1.275
1	LF-LH	0.16	1.325
1	LF-LH	0.145	1.345
1	LF-LH	0.155	1.26
1	LF-LH	0.14	1.325
1	LF-LH	0.09	1.135
1	LF-LH		0
2	LF-RH	0.14	1.27
2	LF-RH	0.195	1.42
2	LF-RH	0.16	1.54
2	LF-RH	0.155	1.575
2	LF-RH	0.14	1.565
2	LF-RH	0.18	1.595
2	LF-RH	0.135	1.4
2	LF-RH	0.125	1.465
2	LF-RH	0.175	1.45
2	LF-RH	0.155	1.505
2	LF-RH	0.135	1.52
2	LF-RH	0.155	1.545
2	LF-RH	0.145	1.615
2	LF-RH	0.145	1.55
2	LF-RH	0.11	1.495
2	LF-RH	0.14	1.45
2	LF-RH	0.16	1.485
2	LF-RH	0.11	1.435
2	LF-RH	0.17	1.475
2	LF-RH	0.15	1.425
2	LF-RH	0.14	1.44
2	LF-RH	0.15	1.405
2	LF-RH	0.15	1.5
2	LF-RH	0.155	1.31
2	LF-RH	0.15	1.445
2	LF-RH	0.18	1.525
2	LF-RH	0.12	1.565
2	LF-RH	0.14	1.59
2	LF-RH	0.16	1.365
2	LF-RH	0.16	1.435
2	LF-RH	0.09	1.35
2	LF-RH	0.11	1.355
2	LF-RH	0.13	1.43
2	LF-RH	0.115	1.545
2	LF-RH	0.11	1.315
2	LF-RH	0.16	1.57
2	LF-RH	0.16	1.35
2	LF-RH	0.14	1.485
2	LF-RH	0.115	1.535
2	LF-RH	0.17	1.39
2	LF-RH		0
2	LF-RH	0.145	1.605
2	LF-RH	0.135	1.565
2	LF-RH	0.11	1.715
2	LF-RH	0.13	1.25
2	LF-RH	0.15	1.435
2	LF-RH	0.15	1.4
2	LF-RH	0.145	1.435
2	LF-RH	0.15	1.445
2	LF-RH	0.185	1.57
2	LF-RH	0.015	1.76
2	LF-RH	0.165	1.645
2	LF-RH	0.135	1.425
2	LF-RH	0.115	1.405
2	LF-RH	0.155	1.51
2	LF-RH	0.095	1.435
2	LF-RH	0.11	1.525
2	LF-RH	0.13	1.465
2	LF-RH	0.16	1.465
2	LF-RH	0.16	1.54
2	LF-RH	0.17	1.32
2	LF-RH	0.18	1.5
2	LF-RH	0.16	1.51
2	LF-RH	0.14	1.905
2	LF-RH	0.08	1.565
2	LF-RH	0.08	1.54
2	LF-RH	0.15	1.595
2	LF-RH	0.14	1.705
2	LF-RH	0.085	1.535
2	LF-RH	0.15	1.49
2	LF-RH	0.15	1.45
2	LF-RH	0.185	1.475
2	LF-RH	0.16	1.63
2	LF-RH	0.18	1.365
2	LF-RH	0.165	1.535
2	LF-RH	0.165	1.795
2	LF-RH	0.14	2.29
2	LF-RH	0.165	1.885
2	LF-RH		2.19
2	LF-RH	0.08	1.685
2	LF-RH	0.12	1.565
2	LF-RH		0
2	LF-RH	0.02	1.425
2	LF-RH	0.18	1.47
2	LF-RH	0.16	1.37
2	LF-RH	0.16	1.42
2	LF-RH	0.155	1.515
2	LF-RH	0.195	1.275
2	LF-RH	0.185	1.335
2	LF-RH	0.155	1.54
2	LF-RH	0.15	1.255
2	LF-RH	0.17	1.445
2	LF-RH	0.155	1.465
2	LF-RH	0.165	1.49
2	LF-RH	0.165	1.475
2	LF-RH	0.17	1.465
2	LF-RH	0.19	1.45
2	LF-RH	0.18	1.43
2	LF-RH	0.175	1.405
2	LF-RH	0.2	1.51
2	LF-RH	0.185	1.24
2	LF-RH	0.175	1.47
2	LF-RH	0.155	1.365
2	LF-RH	0.185	1.37
2	LF-RH	0.165	1.365
2	LF-RH	0.185	1.24
2	LF-RH	0.18	1.365
2	LF-RH	0.175	1.355
2	LF-RH	0.185	1.365
2	LF-RH	0.135	1.475
2	LF-RH	0.17	1.915
2	LF-RH	0.115	1.4
2	LF-RH	0.135	1.395
2	LF-RH	0.18	1.355
2	LF-RH	0.195	1.44
2	LF-RH	0.175	1.23
2	LF-RH	0.18	1.48
2	LF-RH	0.165	1.385
2	LF-RH	0.155	1.395
2	LF-RH	0.175	1.275
2	LF-RH	0.17	1.505
2	LF-RH	0.115	1.245
2	LF-RH	0.185	1.475
2	LF-RH	0.18	1.245
2	LF-RH		0
2	LF-RH	0.065	1.415
2	LF-RH	0.15	1.495
2	LF-RH	0.14	1.555
2	LF-RH	0.15	1.525
2	LF-RH	0.14	1.355
2	LF-RH	0.17	1.42
2	LF-RH	0.16	1.51
2	LF-RH	0.14	1.525
2	LF-RH	0.165	1.615
2	LF-RH	0.13	1.355
2	LF-RH	0.145	1.49
2	LF-RH	0.17	1.395
2	LF-RH	0.12	1.415
2	LF-RH	0.18	1.52
2	LF-RH	0.15	1.32
2	LF-RH	0.175	1.335
2	LF-RH	0.2	1.44
2	LF-RH	0.2	1.3
2	LF-RH	0.165	1.235
2	LF-RH	0.18	1.13
2	LF-RH	0.19	1.295
2	LF-RH	0.19	1.185
2	LF-RH	0.19	1.2
2	LF-RH	0.21	1.235
2	LF-RH	0.2	1.205
2	LF-RH	0.17	1.325
2	LF-RH	0.14	1.37
2	LF-RH	0.125	1.355
2	LF-RH	0.14	1.36
2	LF-RH	0.185	1.46
2	LF-RH	0.18	1.225
2	LF-RH	0.135	1.365
2	LF-RH	0.18	1.33
2	LF-RH	0.145	1.365
2	LF-RH	0.215	1.195
2	LF-RH	0.14	1.385
2	LF-RH	0.155	1.39
2	LF-RH	0.13	1.365
2	LF-RH	0.14	1.385
2	LF-RH	0.145	1.525
2	LF-RH	0.155	1.27
2	LF-RH	0.185	1.41
2	LF-RH	0.135	1.425
2	LF-RH	0.165	1.475
2	LF-RH	0.17	1.54
2	LF-RH		0
2	LF-RH	0.105	1.375
2	LF-RH	0.2	0.995
2	LF-RH	0.235	1.255
2	LF-RH	0.135	1.43
2	LF-RH	0.175	1.185
2	LF-RH	0.165	1.39
2	LF-RH	0.2	1.365
2	LF-RH	0.155	1.53
2	LF-RH	0.155	1.595
2	LF-RH	0.145	1.615
2	LF-RH	0.14	1.63
2	LF-RH	0.14	1.82
2	LF-RH	0.115	1.65
2	LF-RH	0.135	1.55
2	LF-RH	0.145	1.53
2	LF-RH	0.14	1.5
2	LF-RH	0.135	1.36
2	LF-RH	0.155	1.605
2	LF-RH	0.16	1.45
2	LF-RH		1.985
2	LF-RH	0.155	1.525
2	LF-RH	0.145	1.575
2	LF-RH	0.16	1.31
2	LF-RH	0.17	1.19
2	LF-RH	0.24	1.19
2	LF-RH	0.16	1.165
2	LF-RH	0.18	1.33
2	LF-RH	0.18	1.365
2	LF-RH	0.16	1.475
2	LF-RH	0.175	1.245
2	LF-RH	0.18	1.41
2	LF-RH	0.115	1.395
2	LF-RH	0.155	1.41
2	LF-RH	0.165	1.54
2	LF-RH	0.15	1.495
2	LF-RH	0.175	1.355
2	LF-RH	0.155	1.39
2	LF-RH	0.155	1.42
2	LF-RH		0
2	LF-RH	0.16	1.43
2	LF-RH	0.15	1.485
2	LF-RH	0.18	1.22
2	LF-RH	0.185	1.415
2	LF-RH	0.18	1.24
2	LF-RH	0.195	1.37
2	LF-RH	0.195	1.46
2	LF-RH	0.19	1.315
2	LF-RH	0.165	1.265
2	LF-RH	0.175	1.385
2	LF-RH	0.17	1.475
2	LF-RH	0.185	1.24
2	LF-RH	0.22	1.28
2	LF-RH	0.165	1.255
2	LF-RH	0.17	1.32
2	LF-RH	0.215	1.12
2	LF-RH	0.205	1.165
2	LF-RH	0.21	1.135
2	LF-RH	0.195	1.16
2	LF-RH	0.2	1.35
2	LF-RH	0.205	1.185
2	LF-RH	0.21	1.215
2	LF-RH	0.21	1.19
2	LF-RH	0.205	1.15
2	LF-RH	0.2	1.24
2	LF-RH	0.18	1.2
2	LF-RH	0.175	1.29
2	LF-RH	0.18	1.165
2	LF-RH	0.15	1.345
2	LF-RH	0.135	1.445
2	LF-RH	0.165	1.27
2	LF-RH	0.19	1.245
2	LF-RH	0.215	1.215
2	LF-RH	0.195	1.245
2	LF-RH	0.185	1.225
2	LF-RH	0.2	1.185
2	LF-RH		0
2	LF-RH	0.115	1.515
2	LF-RH	0.045	1.695
2	LF-RH	0.155	1.315
2	LF-RH	0.135	1.545
2	LF-RH	0.145	1.625
2	LF-RH	0.16	1.265
2	LF-RH	0.135	1.57
2	LF-RH	0.155	1.61
2	LF-RH	0.19	1.67
2	LF-RH	0.055	1.85
2	LF-RH	0.095	2.01
2	LF-RH	0.04	1.865
2	LF-RH	0.09	1.9
2	LF-RH	0.08	1.695
2	LF-RH	0.085	1.63
2	LF-RH	0.01	1.96
2	LF-RH	0.21	2.515
2	LF-RH	0.145	1.565
2	LF-RH	0.125	1.695
2	LF-RH	0.06	1.76
2	LF-RH	0.13	1.76
2	LF-RH	0.105	1.85
2	LF-RH		1.895
2	LF-RH	0.015	1.995
2	LF-RH	0.135	1.78
2	LF-RH	0.05	1.805
2	LF-RH	0.11	1.645
2	LF-RH	0.145	1.58
2	LF-RH	0.115	1.655
2	LF-RH	0.11	1.735
2	LF-RH	0.125	1.63
2	LF-RH	0.13	1.465
2	LF-RH	0.15	1.445
2	LF-RH	0.14	1.475
2	LF-RH	0.125	1.52
2	LF-RH	0.15	1.545
2	LF-RH	0.14	1.555
2	LF-RH	0.12	1.57
2	LF-RH	0.12	1.55
2	LF-RH	0.135	1.52
2	LF-RH	0.13	1.495
2	LF-RH	0.15	1.485
2	LF-RH	0.145	1.465
2	LF-RH	0.105	1.495
2	LF-RH	0.115	1.58
2	LF-RH		0
2	RF-LH	0.19	1.27
2	RF-LH	0.14	1.42
2	RF-LH	0.2	1.54
2	RF-LH	0.145	1.575
2	RF-LH	0.165	1.565
2	RF-LH	0.175	1.595
2	RF-LH	0.08	1.4
2	RF-LH	0.16	1.465
2	RF-LH	0.165	1.45
2	RF-LH	0.185	1.505
2	RF-LH	0.17	1.52
2	RF-LH	0.19	1.545
2	RF-LH	0.165	1.615
2	RF-LH	0.13	1.55
2	RF-LH	0.17	1.495
2	RF-LH	0.155	1.45
2	RF-LH	0.145	1.485
2	RF-LH	0.12	1.435
2	RF-LH	0.11	1.475
2	RF-LH	0.13	1.425
2	RF-LH	0.12	1.44
2	RF-LH	0.16	1.405
2	RF-LH	0.125	1.5
2	RF-LH	0.135	1.31
2	RF-LH	0.15	1.445
2	RF-LH	0.16	1.525
2	RF-LH	0.145	1.565
2	RF-LH	0.155	1.59
2	RF-LH	0.135	1.365
2	RF-LH	0.145	1.435
2	RF-LH	0.12	1.35
2	RF-LH	0.17	1.355
2	RF-LH	0.185	1.43
2	RF-LH	0.08	1.545
2	RF-LH	0.165	1.315
2	RF-LH	0.165	1.57
2	RF-LH	0.165	1.35
2	RF-LH	0.18	1.485
2	RF-LH	0.13	1.535
2	RF-LH	0.145	1.39
2	RF-LH		0
2	RF-LH	0.175	1.605
2	RF-LH	0.155	1.565
2	RF-LH	0.16	1.715
2	RF-LH	0.1	1.25
2	RF-LH	0.15	1.435
2	RF-LH	0.145	1.4
2	RF-LH	0.165	1.435
2	RF-LH	0.165	1.445
2	RF-LH	0.165	1.57
2	RF-LH	0.08	1.76
2	RF-LH	0.135	1.645
2	RF-LH	0.18	1.425
2	RF-LH	0.165	1.405
2	RF-LH	0.15	1.51
2	RF-LH	0.13	1.435
2	RF-LH	0.1	1.525
2	RF-LH	0.105	1.465
2	RF-LH	0.115	1.465
2	RF-LH	0.185	1.54
2	RF-LH	0.18	1.32
2	RF-LH	0.15	1.5
2	RF-LH	0.16	1.51
2	RF-LH	0.165	1.905
2	RF-LH	0.03	1.565
2	RF-LH	0.17	1.54
2	RF-LH	0.125	1.595
2	RF-LH	0.155	1.705
2	RF-LH	0.15	1.535
2	RF-LH	0.125	1.49
2	RF-LH	0.135	1.45
2	RF-LH	0.16	1.475
2	RF-LH	0.155	1.63
2	RF-LH	0.155	1.365
2	RF-LH	0.185	1.535
2	RF-LH	0.145	1.795
2	RF-LH	0.13	2.29
2	RF-LH	0.135	1.885
2	RF-LH	0.155	2.19
2	RF-LH	0.055	1.685
2	RF-LH	0.16	1.565
2	RF-LH		0
2	RF-LH	0.09	1.425
2	RF-LH	0.16	1.47
2	RF-LH	0.18	1.37
2	RF-LH	0.155	1.42
2	RF-LH	0.175	1.515
2	RF-LH	0.17	1.275
2	RF-LH	0.165	1.335
2	RF-LH	0.15	1.54
2	RF-LH	0.17	1.255
2	RF-LH	0.16	1.445
2	RF-LH	0.18	1.465
2	RF-LH	0.185	1.49
2	RF-LH	0.135	1.475
2	RF-LH	0.165	1.465
2	RF-LH	0.19	1.45
2	RF-LH	0.18	1.43
2	RF-LH	0.18	1.405
2	RF-LH	0.195	1.51
2	RF-LH	0.185	1.24
2	RF-LH	0.17	1.47
2	RF-LH	0.145	1.365
2	RF-LH	0.165	1.37
2	RF-LH	0.165	1.365
2	RF-LH	0.165	1.24
2	RF-LH	0.17	1.365
2	RF-LH	0.18	1.355
2	RF-LH	0.185	1.365
2	RF-LH	0.155	1.475
2	RF-LH	0.24	1.915
2	RF-LH	0.125	1.4
2	RF-LH	0.105	1.395
2	RF-LH	0.12	1.355
2	RF-LH	0.18	1.44
2	RF-LH	0.17	1.23
2	RF-LH	0.18	1.48
2	RF-LH	0.135	1.385
2	RF-LH	0.155	1.395
2	RF-LH	0.14	1.275
2	RF-LH	0.13	1.505
2	RF-LH	0.18	1.245
2	RF-LH	0.14	1.475
2	RF-LH	0.185	1.245
2	RF-LH		0
2	RF-LH	0.05	1.415
2	RF-LH	0.125	1.495
2	RF-LH	0.135	1.555
2	RF-LH	0.13	1.525
2	RF-LH	0.115	1.355
2	RF-LH	0.145	1.42
2	RF-LH	0.205	1.51
2	RF-LH	0.12	1.525
2	RF-LH	0.195	1.615
2	RF-LH	0.14	1.355
2	RF-LH	0.13	1.49
2	RF-LH	0.16	1.395
2	RF-LH	0.14	1.415
2	RF-LH	0.135	1.52
2	RF-LH	0.13	1.32
2	RF-LH	0.135	1.335
2	RF-LH	0.135	1.44
2	RF-LH	0.15	1.3
2	RF-LH	0.13	1.235
2	RF-LH	0.145	1.13
2	RF-LH	0.145	1.295
2	RF-LH	0.14	1.185
2	RF-LH	0.15	1.2
2	RF-LH	0.165	1.235
2	RF-LH	0.14	1.205
2	RF-LH	0.19	1.325
2	RF-LH	0.13	1.37
2	RF-LH	0.115	1.355
2	RF-LH	0.17	1.36
2	RF-LH	0.12	1.46
2	RF-LH	0.135	1.225
2	RF-LH	0.18	1.365
2	RF-LH	0.115	1.33
2	RF-LH	0.19	1.365
2	RF-LH	0.19	1.195
2	RF-LH	0.14	1.385
2	RF-LH	0.13	1.39
2	RF-LH	0.165	1.365
2	RF-LH	0.115	1.385
2	RF-LH	0.1	1.525
2	RF-LH	0.145	1.27
2	RF-LH	0.18	1.41
2	RF-LH	0.145	1.425
2	RF-LH	0.12	1.475
2	RF-LH	0.195	1.54
2	RF-LH		0
2	RF-LH	0.155	1.375
2	RF-LH	0.185	0.995
2	RF-LH	0.215	1.255
2	RF-LH	0.21	1.43
2	RF-LH	0.13	1.185
2	RF-LH	0.2	1.39
2	RF-LH	0.11	1.365
2	RF-LH	0.185	1.53
2	RF-LH	0.125	1.595
2	RF-LH	0.115	1.615
2	RF-LH	0.135	1.63
2	RF-LH	0.18	1.82
2	RF-LH	0.185	1.65
2	RF-LH	0.09	1.55
2	RF-LH	0.205	1.53
2	RF-LH	0.145	1.5
2	RF-LH	0.135	1.36
2	RF-LH	0.13	1.605
2	RF-LH	0.12	1.45
2	RF-LH	0.11	1.985
2	RF-LH	0.005	1.525
2	RF-LH	0.15	1.575
2	RF-LH	0.14	1.31
2	RF-LH	0.13	1.19
2	RF-LH	0.145	1.19
2	RF-LH	0.125	1.165
2	RF-LH	0.155	1.33
2	RF-LH	0.15	1.365
2	RF-LH	0.155	1.475
2	RF-LH	0.14	1.245
2	RF-LH	0.235	1.41
2	RF-LH	0.135	1.395
2	RF-LH	0.165	1.41
2	RF-LH	0.17	1.54
2	RF-LH	0.105	1.495
2	RF-LH	0.15	1.355
2	RF-LH	0.135	1.39
2	RF-LH		1.42
2	RF-LH		0
2	RF-LH	0.18	1.43
2	RF-LH	0.12	1.485
2	RF-LH	0.135	1.22
2	RF-LH	0.2	1.415
2	RF-LH	0.165	1.24
2	RF-LH	0.2	1.37
2	RF-LH	0.15	1.46
2	RF-LH	0.165	1.315
2	RF-LH	0.205	1.265
2	RF-LH	0.16	1.385
2	RF-LH	0.195	1.475
2	RF-LH	0.165	1.24
2	RF-LH	0.205	1.28
2	RF-LH	0.155	1.255
2	RF-LH	0.19	1.32
2	RF-LH	0.185	1.12
2	RF-LH	0.22	1.165
2	RF-LH	0.195	1.135
2	RF-LH	0.195	1.16
2	RF-LH	0.185	1.35
2	RF-LH	0.15	1.185
2	RF-LH	0.24	1.215
2	RF-LH	0.165	1.19
2	RF-LH	0.205	1.15
2	RF-LH	0.21	1.24
2	RF-LH	0.21	1.2
2	RF-LH	0.205	1.29
2	RF-LH	0.15	1.165
2	RF-LH	0.16	1.345
2	RF-LH	0.145	1.445
2	RF-LH	0.13	1.27
2	RF-LH	0.15	1.245
2	RF-LH	0.195	1.215
2	RF-LH	0.225	1.245
2	RF-LH	0.205	1.225
2	RF-LH	0.205	1.185
2	RF-LH		0
2	RF-LH	0.205	1.515
2	RF-LH	0.125	1.695
2	RF-LH	0.155	1.315
2	RF-LH	0.095	1.545
2	RF-LH	0.13	1.625
2	RF-LH	0.115	1.265
2	RF-LH	0.115	1.57
2	RF-LH	0.175	1.61
2	RF-LH	0.15	1.67
2	RF-LH	0.085	1.85
2	RF-LH	0.05	2.01
2	RF-LH	0.165	1.865
2	RF-LH	0.025	1.9
2	RF-LH	0.055	1.695
2	RF-LH	0.08	1.63
2	RF-LH	0.05	1.96
2	RF-LH	0.07	2.515
2	RF-LH	0.155	1.565
2	RF-LH	0.11	1.695
2	RF-LH	0.08	1.76
2	RF-LH	0.085	1.76
2	RF-LH	0.11	1.85
2	RF-LH	0.085	1.895
2	RF-LH	0.19	1.995
2	RF-LH	0.055	1.78
2	RF-LH	0.14	1.805
2	RF-LH	0.11	1.645
2	RF-LH	0.05	1.58
2	RF-LH	0.11	1.655
2	RF-LH	0.1	1.735
2	RF-LH	0.095	1.63
2	RF-LH	0.15	1.465
2	RF-LH	0.1	1.445
2	RF-LH	0.165	1.475
2	RF-LH	0.14	1.52
2	RF-LH	0.14	1.545
2	RF-LH	0.085	1.555
2	RF-LH	0.085	1.57
2	RF-LH	0.105	1.55
2	RF-LH	0.115	1.52
2	RF-LH	0.11	1.495
2	RF-LH	0.125	1.485
2	RF-LH	0.125	1.465
2	RF-LH	0.12	1.495
2	RF-LH	0.125	1.58
2	RF-LH		0
2	RF-RH		1.27
2	RF-RH		1.42
2	RF-RH		1.54
2	RF-RH	0.015	1.575
2	RF-RH		1.565
2	RF-RH	0.105	1.595
2	RF-RH		1.4
2	RF-RH		1.465
2	RF-RH		1.45
2	RF-RH		1.505
2	RF-RH		1.52
2	RF-RH	0.01	1.545
2	RF-RH		1.615
2	RF-RH		1.55
2	RF-RH	0.05	1.495
2	RF-RH		1.45
2	RF-RH	0.005	1.485
2	RF-RH		1.435
2	RF-RH		1.475
2	RF-RH		1.425
2	RF-RH		1.44
2	RF-RH	0.01	1.405
2	RF-RH	0.095	1.5
2	RF-RH	0.005	1.31
2	RF-RH	0.005	1.445
2	RF-RH		1.525
2	RF-RH		1.565
2	RF-RH	0.11	1.59
2	RF-RH		1.365
2	RF-RH	0.005	1.435
2	RF-RH	0.015	1.35
2	RF-RH	0.04	1.355
2	RF-RH	0.015	1.43
2	RF-RH	0.1	1.545
2	RF-RH		1.315
2	RF-RH	0.11	1.57
2	RF-RH		1.35
2	RF-RH		1.485
2	RF-RH	0.125	1.535
2	RF-RH		1.39
2	RF-RH		0
2	RF-RH	0.05	1.605
2	RF-RH	0.025	1.565
2	RF-RH	0.195	1.715
2	RF-RH	0.01	1.25
2	RF-RH	0.01	1.435
2	RF-RH	0.005	1.4
2	RF-RH		1.435
2	RF-RH	0.01	1.445
2	RF-RH	0.005	1.57
2	RF-RH	0.02	1.76
2	RF-RH	0.02	1.645
2	RF-RH	0.005	1.425
2	RF-RH	0.005	1.405
2	RF-RH	0.005	1.51
2	RF-RH	0.04	1.435
2	RF-RH		1.525
2	RF-RH	0.01	1.465
2	RF-RH		1.465
2	RF-RH	0.11	1.54
2	RF-RH		1.32
2	RF-RH	0.01	1.5
2	RF-RH		1.51
2	RF-RH	0.2	1.905
2	RF-RH		1.565
2	RF-RH	0.01	1.54
2	RF-RH		1.595
2	RF-RH		1.705
2	RF-RH	0.085	1.535
2	RF-RH	0.035	1.49
2	RF-RH		1.45
2	RF-RH		1.475
2	RF-RH	0.11	1.63
2	RF-RH	0.005	1.365
2	RF-RH		1.535
2	RF-RH		1.795
2	RF-RH	0.045	2.29
2	RF-RH		1.885
2	RF-RH	0.17	2.19
2	RF-RH	0.06	1.685
2	RF-RH		1.565
2	RF-RH		0
2	RF-RH		1.425
2	RF-RH	0.01	1.47
2	RF-RH	0.02	1.37
2	RF-RH		1.42
2	RF-RH	0.11	1.515
2	RF-RH	0.01	1.275
2	RF-RH		1.335
2	RF-RH	0.13	1.54
2	RF-RH	0.02	1.255
2	RF-RH		1.445
2	RF-RH	0.04	1.465
2	RF-RH	0.01	1.49
2	RF-RH		1.475
2	RF-RH		1.465
2	RF-RH		1.45
2	RF-RH		1.43
2	RF-RH		1.405
2	RF-RH	0.12	1.51
2	RF-RH		1.24
2	RF-RH	0.205	1.47
2	RF-RH	0.12	1.365
2	RF-RH	0.15	1.37
2	RF-RH	0.11	1.365
2	RF-RH		1.24
2	RF-RH		1.365
2	RF-RH		1.355
2	RF-RH		1.365
2	RF-RH	0.055	1.475
2	RF-RH	0.055	1.915
2	RF-RH		1.4
2	RF-RH		1.395
2	RF-RH		1.355
2	RF-RH	0.115	1.44
2	RF-RH	0.005	1.23
2	RF-RH	0.12	1.48
2	RF-RH	0.125	1.385
2	RF-RH	0.14	1.395
2	RF-RH	0.04	1.275
2	RF-RH	0.105	1.505
2	RF-RH		1.245
2	RF-RH	0.11	1.475
2	RF-RH	0.095	1.245
2	RF-RH		0
2	RF-RH	0.005	1.415
2	RF-RH	0.005	1.495
2	RF-RH		1.555
2	RF-RH		1.525
2	RF-RH	0.02	1.355
2	RF-RH		1.42
2	RF-RH	0.01	1.51
2	RF-RH		1.525
2	RF-RH	0.095	1.615
2	RF-RH		1.355
2	RF-RH	0.05	1.49
2	RF-RH	0.01	1.395
2	RF-RH	0.01	1.415
2	RF-RH	0.1	1.52
2	RF-RH	0.015	1.32
2	RF-RH	0.03	1.335
2	RF-RH	0.11	1.44
2	RF-RH	0.15	1.3
2	RF-RH	0.125	1.235
2	RF-RH	0.04	1.13
2	RF-RH	0.145	1.295
2	RF-RH	0.12	1.185
2	RF-RH	0.12	1.2
2	RF-RH	0.135	1.235
2	RF-RH	0.035	1.205
2	RF-RH	0.025	1.325
2	RF-RH	0.045	1.37
2	RF-RH	0.055	1.355
2	RF-RH	0.05	1.36
2	RF-RH	0.11	1.46
2	RF-RH	0.015	1.225
2	RF-RH	0.04	1.365
2	RF-RH	0.025	1.33
2	RF-RH	0.135	1.365
2	RF-RH	0.015	1.195
2	RF-RH	0.025	1.385
2	RF-RH	0.025	1.39
2	RF-RH	0.03	1.365
2	RF-RH	0.02	1.385
2	RF-RH	0.105	1.525
2	RF-RH	0.02	1.27
2	RF-RH	0.005	1.41
2	RF-RH	0.03	1.425
2	RF-RH		1.475
2	RF-RH		1.54
2	RF-RH		0
2	RF-RH	0.145	1.375
2	RF-RH	0.13	0.995
2	RF-RH	0.01	1.255
2	RF-RH	0.105	1.43
2	RF-RH	0.13	1.185
2	RF-RH	0.13	1.39
2	RF-RH	0.01	1.365
2	RF-RH		1.53
2	RF-RH	0.005	1.595
2	RF-RH		1.615
2	RF-RH		1.63
2	RF-RH	0.1	1.82
2	RF-RH	0.14	1.65
2	RF-RH	0.11	1.55
2	RF-RH	0.115	1.53
2	RF-RH	0.1	1.5
2	RF-RH	0.015	1.36
2	RF-RH	0.12	1.605
2	RF-RH		1.45
2	RF-RH		1.985
2	RF-RH	0.075	1.525
2	RF-RH	0.13	1.575
2	RF-RH	0.15	1.31
2	RF-RH	0.155	1.19
2	RF-RH	0.125	1.19
2	RF-RH	0.015	1.165
2	RF-RH	0.015	1.33
2	RF-RH	0.02	1.365
2	RF-RH	0.15	1.475
2	RF-RH	0.025	1.245
2	RF-RH	0.03	1.41
2	RF-RH	0.06	1.395
2	RF-RH	0.035	1.41
2	RF-RH	0.04	1.54
2	RF-RH	0.055	1.495
2	RF-RH	0.03	1.355
2	RF-RH		1.39
2	RF-RH		1.42
2	RF-RH		0
2	RF-RH	0.025	1.43
2	RF-RH	0.135	1.485
2	RF-RH	0.035	1.22
2	RF-RH	0.1	1.415
2	RF-RH	0.015	1.24
2	RF-RH	0.005	1.37
2	RF-RH	0.1	1.46
2	RF-RH	0.105	1.315
2	RF-RH		1.265
2	RF-RH		1.385
2	RF-RH	0.11	1.475
2	RF-RH	0.125	1.24
2	RF-RH	0.13	1.28
2	RF-RH	0.02	1.255
2	RF-RH	0.15	1.32
2	RF-RH	0.135	1.12
2	RF-RH	0.11	1.165
2	RF-RH	0.16	1.135
2	RF-RH	0.03	1.16
2	RF-RH	0.13	1.35
2	RF-RH	0.14	1.185
2	RF-RH	0.12	1.215
2	RF-RH	0.14	1.19
2	RF-RH	0.14	1.15
2	RF-RH	0.12	1.24
2	RF-RH	0.135	1.2
2	RF-RH	0.14	1.29
2	RF-RH		1.165
2	RF-RH	0.03	1.345
2	RF-RH	0.13	1.445
2	RF-RH	0.145	1.27
2	RF-RH	0.115	1.245
2	RF-RH	0.12	1.215
2	RF-RH	0.12	1.245
2	RF-RH	0.13	1.225
2	RF-RH	0.14	1.185
2	RF-RH		0
2	RF-RH	0.225	1.515
2	RF-RH	0.05	1.695
2	RF-RH	0.065	1.315
2	RF-RH		1.545
2	RF-RH	0.13	1.625
2	RF-RH	0.035	1.265
2	RF-RH	0.03	1.57
2	RF-RH		1.61
2	RF-RH		1.67
2	RF-RH	0.02	1.85
2	RF-RH	0.045	2.01
2	RF-RH	0.025	1.865
2	RF-RH		1.9
2	RF-RH	0.13	1.695
2	RF-RH		1.63
2	RF-RH	0.12	1.96
2	RF-RH	0.12	2.515
2	RF-RH	0.105	1.565
2	RF-RH		1.695
2	RF-RH	0.01	1.76
2	RF-RH		1.76
2	RF-RH	0.07	1.85
2	RF-RH	0.05	1.895
2	RF-RH	0.125	1.995
2	RF-RH		1.78
2	RF-RH	0.01	1.805
2	RF-RH	0.04	1.645
2	RF-RH		1.58
2	RF-RH		1.655
2	RF-RH	0.01	1.735
2	RF-RH	0.055	1.63
2	RF-RH	0.065	1.465
2	RF-RH	0.04	1.445
2	RF-RH	0.035	1.475
2	RF-RH	0.045	1.52
2	RF-RH	0.03	1.545
2	RF-RH	0.045	1.555
2	RF-RH		1.57
2	RF-RH	0.005	1.55
2	RF-RH	0.035	1.52
2	RF-RH		1.495
2	RF-RH		1.485
2	RF-RH	0.015	1.465
2	RF-RH		1.495
2	RF-RH	0.025	1.58
2	RF-RH		0
2	LF-LH	0.035	1.27
2	LF-LH	0.03	1.42
2	LF-LH		1.54
2	LF-LH		1.575
2	LF-LH	0.18	1.565
2	LF-LH		1.595
2	LF-LH	0.185	1.4
2	LF-LH	0.155	1.465
2	LF-LH		1.45
2	LF-LH		1.505
2	LF-LH	0.14	1.52
2	LF-LH		1.545
2	LF-LH	0.045	1.615
2	LF-LH		1.55
2	LF-LH		1.495
2	LF-LH		1.45
2	LF-LH		1.485
2	LF-LH	0.06	1.435
2	LF-LH		1.475
2	LF-LH		1.425
2	LF-LH		1.44
2	LF-LH		1.405
2	LF-LH		1.5
2	LF-LH		1.31
2	LF-LH		1.445
2	LF-LH	0.005	1.525
2	LF-LH	0.02	1.565
2	LF-LH	0.02	1.59
2	LF-LH		1.365
2	LF-LH		1.435
2	LF-LH	0.025	1.35
2	LF-LH	0.02	1.355
2	LF-LH		1.43
2	LF-LH		1.545
2	LF-LH	0.045	1.315
2	LF-LH	0.045	1.57
2	LF-LH		1.35
2	LF-LH		1.485
2	LF-LH	0.025	1.535
2	LF-LH		1.39
2	LF-LH		0
2	LF-LH	0.17	1.605
2	LF-LH		1.565
2	LF-LH	0.16	1.715
2	LF-LH	0.015	1.25
2	LF-LH		1.435
2	LF-LH	0.04	1.4
2	LF-LH		1.435
2	LF-LH		1.445
2	LF-LH		1.57
2	LF-LH	0.2	1.76
2	LF-LH	0.215	1.645
2	LF-LH	0.02	1.425
2	LF-LH		1.405
2	LF-LH		1.51
2	LF-LH		1.435
2	LF-LH		1.525
2	LF-LH	0.01	1.465
2	LF-LH		1.465
2	LF-LH		1.54
2	LF-LH		1.32
2	LF-LH		1.5
2	LF-LH	0.025	1.51
2	LF-LH		1.905
2	LF-LH	0.16	1.565
2	LF-LH		1.54
2	LF-LH		1.595
2	LF-LH	0.125	1.705
2	LF-LH	0.165	1.535
2	LF-LH		1.49
2	LF-LH		1.45
2	LF-LH	0.025	1.475
2	LF-LH		1.63
2	LF-LH		1.365
2	LF-LH		1.535
2	LF-LH		1.795
2	LF-LH	0.075	2.29
2	LF-LH	0.11	1.885
2	LF-LH	0.09	2.19
2	LF-LH	0.01	1.685
2	LF-LH		1.565
2	LF-LH		0
2	LF-LH	0.175	1.425
2	LF-LH	0.155	1.47
2	LF-LH	0.02	1.37
2	LF-LH		1.42
2	LF-LH		1.515
2	LF-LH		1.275
2	LF-LH		1.335
2	LF-LH	0.01	1.54
2	LF-LH		1.255
2	LF-LH		1.445
2	LF-LH		1.465
2	LF-LH		1.49
2	LF-LH	0.115	1.475
2	LF-LH		1.465
2	LF-LH		1.45
2	LF-LH	0.025	1.43
2	LF-LH	0.03	1.405
2	LF-LH		1.51
2	LF-LH		1.24
2	LF-LH	0.025	1.47
2	LF-LH	0.03	1.365
2	LF-LH		1.37
2	LF-LH		1.365
2	LF-LH	0.025	1.24
2	LF-LH		1.365
2	LF-LH		1.355
2	LF-LH		1.365
2	LF-LH	0.01	1.475
2	LF-LH		1.915
2	LF-LH		1.4
2	LF-LH	0.04	1.395
2	LF-LH		1.355
2	LF-LH		1.44
2	LF-LH		1.23
2	LF-LH		1.48
2	LF-LH		1.385
2	LF-LH	0.02	1.395
2	LF-LH		1.275
2	LF-LH		1.505
2	LF-LH		1.245
2	LF-LH	0.03	1.475
2	LF-LH		1.245
2	LF-LH		0
2	LF-LH	0.075	1.415
2	LF-LH		1.495
2	LF-LH	0.105	1.555
2	LF-LH		1.525
2	LF-LH	0.02	1.355
2	LF-LH		1.42
2	LF-LH	0.14	1.51
2	LF-LH		1.525
2	LF-LH	0.065	1.615
2	LF-LH		1.355
2	LF-LH	0.14	1.49
2	LF-LH		1.395
2	LF-LH		1.415
2	LF-LH	0.13	1.52
2	LF-LH		1.32
2	LF-LH		1.335
2	LF-LH		1.44
2	LF-LH	0.01	1.3
2	LF-LH	0.01	1.235
2	LF-LH	0.01	1.13
2	LF-LH		1.295
2	LF-LH	0.015	1.185
2	LF-LH	0.015	1.2
2	LF-LH		1.235
2	LF-LH		1.205
2	LF-LH		1.325
2	LF-LH		1.37
2	LF-LH		1.355
2	LF-LH		1.36
2	LF-LH		1.46
2	LF-LH		1.225
2	LF-LH		1.365
2	LF-LH	0.005	1.33
2	LF-LH	0.015	1.365
2	LF-LH		1.195
2	LF-LH		1.385
2	LF-LH		1.39
2	LF-LH		1.365
2	LF-LH		1.385
2	LF-LH	0.005	1.525
2	LF-LH	0.01	1.27
2	LF-LH		1.41
2	LF-LH		1.425
2	LF-LH		1.475
2	LF-LH	0.15	1.54
2	LF-LH		0
2	LF-LH	0.17	1.375
2	LF-LH	0.045	0.995
2	LF-LH	0.01	1.255
2	LF-LH	0.05	1.43
2	LF-LH	0.045	1.185
2	LF-LH		1.39
2	LF-LH		1.365
2	LF-LH		1.53
2	LF-LH	0.08	1.595
2	LF-LH		1.615
2	LF-LH	0.16	1.63
2	LF-LH	0.15	1.82
2	LF-LH	0.075	1.65
2	LF-LH		1.55
2	LF-LH		1.53
2	LF-LH		1.5
2	LF-LH		1.36
2	LF-LH		1.605
2	LF-LH	0.145	1.45
2	LF-LH		1.985
2	LF-LH	0.13	1.525
2	LF-LH		1.575
2	LF-LH	0.03	1.31
2	LF-LH	0.115	1.19
2	LF-LH	0.03	1.19
2	LF-LH	0.025	1.165
2	LF-LH	0.005	1.33
2	LF-LH		1.365
2	LF-LH		1.475
2	LF-LH	0.005	1.245
2	LF-LH		1.41
2	LF-LH		1.395
2	LF-LH	0.015	1.41
2	LF-LH		1.54
2	LF-LH		1.495
2	LF-LH	0.005	1.355
2	LF-LH	0.01	1.39
2	LF-LH		1.42
2	LF-LH		0
2	LF-LH		1.43
2	LF-LH	0.01	1.485
2	LF-LH	0.01	1.22
2	LF-LH		1.415
2	LF-LH		1.24
2	LF-LH		1.37
2	LF-LH		1.46
2	LF-LH		1.315
2	LF-LH		1.265
2	LF-LH		1.385
2	LF-LH		1.475
2	LF-LH	0.015	1.24
2	LF-LH		1.28
2	LF-LH		1.255
2	LF-LH	0.095	1.32
2	LF-LH	0.02	1.12
2	LF-LH	0.015	1.165
2	LF-LH	0.105	1.135
2	LF-LH		1.16
2	LF-LH	0.005	1.35
2	LF-LH	0.01	1.185
2	LF-LH	0.005	1.215
2	LF-LH		1.19
2	LF-LH	0.1	1.15
2	LF-LH	0.01	1.24
2	LF-LH	0.02	1.2
2	LF-LH		1.29
2	LF-LH	0.005	1.165
2	LF-LH		1.345
2	LF-LH		1.445
2	LF-LH	0.1	1.27
2	LF-LH		1.245
2	LF-LH		1.215
2	LF-LH	0.005	1.245
2	LF-LH	0.005	1.225
2	LF-LH	0.005	1.185
2	LF-LH		0
2	LF-LH	0.045	1.515
2	LF-LH	0.095	1.695
2	LF-LH	0.13	1.315
2	LF-LH	0.005	1.545
2	LF-LH	0.09	1.625
2	LF-LH	0.005	1.265
2	LF-LH	0.15	1.57
2	LF-LH		1.61
2	LF-LH		1.67
2	LF-LH	0.105	1.85
2	LF-LH	0.01	2.01
2	LF-LH	0.11	1.865
2	LF-LH	0.115	1.9
2	LF-LH	0.15	1.695
2	LF-LH	0.14	1.63
2	LF-LH	0.07	1.96
2	LF-LH		2.515
2	LF-LH	0.155	1.565
2	LF-LH		1.695
2	LF-LH	0.145	1.76
2	LF-LH	0.085	1.76
2	LF-LH	0.205	1.85
2	LF-LH	0.015	1.895
2	LF-LH	0.085	1.995
2	LF-LH	0.075	1.78
2	LF-LH	0.135	1.805
2	LF-LH		1.645
2	LF-LH		1.58
2	LF-LH	0.005	1.655
2	LF-LH	0.155	1.735
2	LF-LH		1.63
2	LF-LH	0.12	1.465
2	LF-LH		1.445
2	LF-LH		1.475
2	LF-LH		1.52
2	LF-LH		1.545
2	LF-LH		1.555
2	LF-LH		1.57
2	LF-LH		1.55
2	LF-LH		1.52
2	LF-LH		1.495
2	LF-LH		1.485
2	LF-LH		1.465
2	LF-LH		1.495
2	LF-LH		1.58
2	LF-LH		0
3	LF-RH		1.46
3	LF-RH		1.28
3	LF-RH	0.05	1.235
3	LF-RH	0.065	1.315
3	LF-RH	0.055	1.17
3	LF-RH	0.085	1.35
3	LF-RH	0.08	1.265
3	LF-RH	0.11	1.325
3	LF-RH	0.09	1.195
3	LF-RH	0.1	1.165
3	LF-RH	0.08	1.165
3	LF-RH	0.085	1.095
3	LF-RH	0.1	1.06
3	LF-RH	0.13	1.045
3	LF-RH	0.09	1.065
3	LF-RH	0.09	1.075
3	LF-RH	0.105	1.07
3	LF-RH	0.1	1.09
3	LF-RH	0.125	1.07
3	LF-RH	0.09	1.09
3	LF-RH	0.12	1.145
3	LF-RH	0.095	1.105
3	LF-RH	0.12	1.08
3	LF-RH	0.08	1.125
3	LF-RH	0.075	1.105
3	LF-RH	0.105	1.07
3	LF-RH	0.13	1.035
3	LF-RH	0.1	1.085
3	LF-RH	0.09	1.22
3	LF-RH	0.065	1.235
3	LF-RH	0.09	1.105
3	LF-RH	0.105	1.12
3	LF-RH	0.11	1.15
3	LF-RH	0.09	1.155
3	LF-RH	0.075	1.115
3	LF-RH	0.065	2.31
3	LF-RH	0.04	1.315
3	LF-RH	0.105	1.235
3	LF-RH	0.105	1.175
3	LF-RH	0.12	1.13
3	LF-RH	0.115	1.265
3	LF-RH	0.1	1.34
3	LF-RH		0
3	LF-RH	0.075	1.22
3	LF-RH	0.085	1.295
3	LF-RH	0.07	1.355
3	LF-RH	0.11	1.25
3	LF-RH	0.065	1.09
3	LF-RH	0.08	1.31
3	LF-RH	0.095	1.27
3	LF-RH	0.095	1.22
3	LF-RH	0.1	1.75
3	LF-RH	0.07	1.19
3	LF-RH	0.095	1.42
3	LF-RH	0.08	1.435
3	LF-RH	0.1	1.41
3	LF-RH	0.075	1.315
3	LF-RH	0.06	1.34
3	LF-RH	0.075	1.14
3	LF-RH	0.095	1.1
3	LF-RH	0.115	1.165
3	LF-RH	0.1	1.25
3	LF-RH	0.125	1.325
3	LF-RH	0.01	1.69
3	LF-RH	0.05	2.095
3	LF-RH	0.115	2.01
3	LF-RH	0.095	1.29
3	LF-RH	0.035	1.6
3	LF-RH	0.075	1.385
3	LF-RH	0.085	1.165
3	LF-RH	0.085	1.16
3	LF-RH	0.085	1.18
3	LF-RH	0.105	1.225
3	LF-RH	0.12	1.25
3	LF-RH	0.12	1.265
3	LF-RH		0
3	LF-RH		1.22
3	LF-RH	0.055	1.05
3	LF-RH	0.095	1.04
3	LF-RH	0.115	1.055
3	LF-RH	0.11	1.105
3	LF-RH	0.11	1.09
3	LF-RH	0.105	1.09
3	LF-RH	0.14	1.07
3	LF-RH	0.13	1.055
3	LF-RH	0.125	1.01
3	LF-RH	0.165	0.995
3	LF-RH	0.155	1.05
3	LF-RH	0.115	1.065
3	LF-RH	0.14	1.095
3	LF-RH	0.12	1.105
3	LF-RH	0.105	1.085
3	LF-RH	0.14	1.05
3	LF-RH	0.145	1.02
3	LF-RH	0.16	1.03
3	LF-RH	0.115	1.02
3	LF-RH	0.15	0.98
3	LF-RH	0.125	0.985
3	LF-RH	0.115	1.03
3	LF-RH	0.14	1.075
3	LF-RH	0.085	1.09
3	LF-RH	0.125	1.14
3	LF-RH	0.09	1.205
3	LF-RH	0.085	1.08
3	LF-RH	0.15	1.06
3	LF-RH	0.12	1.065
3	LF-RH	0.16	1.075
3	LF-RH	0.155	1.055
3	LF-RH	0.15	1.055
3	LF-RH	0.11	1.07
3	LF-RH	0.11	1.11
3	LF-RH	0.09	1.15
3	LF-RH		0
3	LF-RH	0.055	1.47
3	LF-RH	0.045	1.27
3	LF-RH	0.08	1.215
3	LF-RH	0.075	1.33
3	LF-RH	0.08	1.61
3	LF-RH	0.065	1.145
3	LF-RH	0.055	1.195
3	LF-RH	0.085	1.09
3	LF-RH	0.095	1.065
3	LF-RH	0.125	1.08
3	LF-RH	0.115	1.19
3	LF-RH	0.085	1.23
3	LF-RH	0.075	1.29
3	LF-RH	0.125	1.71
3	LF-RH		1.37
3	LF-RH	0.05	1.415
3	LF-RH	0.065	1.355
3	LF-RH	0.12	1.41
3	LF-RH	0.14	0.97
3	LF-RH	0.12	0.94
3	LF-RH	0.115	1.065
3	LF-RH	0.14	1.17
3	LF-RH	0.14	1.35
3	LF-RH	0.12	1.285
3	LF-RH	0.06	1.73
3	LF-RH	0.055	1.38
3	LF-RH		0
3	RF-LH	0.15	1.46
3	RF-LH	0.07	1.28
3	RF-LH	0.07	1.235
3	RF-LH	0.065	1.315
3	RF-LH	0.125	1.17
3	RF-LH	0.105	1.35
3	RF-LH	0.13	1.265
3	RF-LH	0.14	1.325
3	RF-LH	0.135	1.195
3	RF-LH	0.12	1.165
3	RF-LH	0.13	1.165
3	RF-LH	0.125	1.095
3	RF-LH	0.125	1.06
3	RF-LH	0.155	1.045
3	RF-LH	0.14	1.065
3	RF-LH	0.145	1.075
3	RF-LH	0.125	1.07
3	RF-LH	0.16	1.09
3	RF-LH	0.14	1.07
3	RF-LH	0.17	1.09
3	RF-LH	0.16	1.145
3	RF-LH	0.13	1.105
3	RF-LH	0.14	1.08
3	RF-LH	0.14	1.125
3	RF-LH	0.135	1.105
3	RF-LH	0.15	1.07
3	RF-LH	0.145	1.035
3	RF-LH	0.15	1.085
3	RF-LH	0.16	1.22
3	RF-LH	0.15	1.235
3	RF-LH	0.125	1.105
3	RF-LH	0.135	1.12
3	RF-LH	0.15	1.15
3	RF-LH	0.145	1.155
3	RF-LH	0.145	1.115
3	RF-LH	0.08	2.31
3	RF-LH	0.125	1.315
3	RF-LH	0.135	1.235
3	RF-LH	0.14	1.175
3	RF-LH	0.11	1.13
3	RF-LH	0.155	1.265
3	RF-LH	0.13	1.34
3	RF-LH		0
3	RF-LH	0.115	1.22
3	RF-LH	0.105	1.295
3	RF-LH	0.13	1.355
3	RF-LH	0.145	1.25
3	RF-LH	0.135	1.09
3	RF-LH	0.14	1.31
3	RF-LH	0.155	1.27
3	RF-LH	0.13	1.22
3	RF-LH	0.12	1.75
3	RF-LH	0.13	1.19
3	RF-LH	0.15	1.42
3	RF-LH	0.135	1.435
3	RF-LH	0.105	1.41
3	RF-LH	0.14	1.315
3	RF-LH	0.105	1.34
3	RF-LH	0.135	1.14
3	RF-LH	0.125	1.1
3	RF-LH	0.155	1.165
3	RF-LH	0.155	1.25
3	RF-LH	0.14	1.325
3	RF-LH	0.135	1.69
3	RF-LH	0.07	2.095
3	RF-LH		2.01
3	RF-LH	0.12	1.29
3	RF-LH	0.16	1.6
3	RF-LH	0.065	1.385
3	RF-LH	0.13	1.165
3	RF-LH	0.11	1.16
3	RF-LH	0.13	1.18
3	RF-LH	0.135	1.225
3	RF-LH	0.17	1.25
3	RF-LH	0.165	1.265
3	RF-LH		0
3	RF-LH	0.045	1.22
3	RF-LH	0.08	1.05
3	RF-LH	0.12	1.04
3	RF-LH	0.145	1.055
3	RF-LH	0.155	1.105
3	RF-LH	0.125	1.09
3	RF-LH	0.16	1.09
3	RF-LH	0.16	1.07
3	RF-LH	0.165	1.055
3	RF-LH	0.17	1.01
3	RF-LH	0.185	0.995
3	RF-LH	0.185	1.05
3	RF-LH	0.165	1.065
3	RF-LH	0.145	1.095
3	RF-LH	0.175	1.105
3	RF-LH	0.165	1.085
3	RF-LH	0.16	1.05
3	RF-LH	0.16	1.02
3	RF-LH	0.175	1.03
3	RF-LH	0.175	1.02
3	RF-LH	0.16	0.98
3	RF-LH	0.175	0.985
3	RF-LH	0.175	1.03
3	RF-LH	0.17	1.075
3	RF-LH	0.14	1.09
3	RF-LH	0.15	1.14
3	RF-LH	0.16	1.205
3	RF-LH	0.115	1.08
3	RF-LH	0.155	1.06
3	RF-LH	0.165	1.065
3	RF-LH	0.165	1.075
3	RF-LH	0.155	1.055
3	RF-LH	0.17	1.055
3	RF-LH	0.15	1.07
3	RF-LH	0.17	1.11
3	RF-LH	0.145	1.15
3	RF-LH		0
3	RF-LH	0.04	1.47
3	RF-LH	0.145	1.27
3	RF-LH	0.09	1.215
3	RF-LH	0.1	1.33
3	RF-LH	0.15	1.61
3	RF-LH	0.145	1.145
3	RF-LH	0.135	1.195
3	RF-LH	0.135	1.09
3	RF-LH	0.11	1.065
3	RF-LH	0.14	1.08
3	RF-LH	0.15	1.19
3	RF-LH	0.14	1.23
3	RF-LH	0.14	1.29
3	RF-LH	0.155	1.71
3	RF-LH	0.205	1.37
3	RF-LH	0.085	1.415
3	RF-LH	0.07	1.355
3	RF-LH	0.14	1.41
3	RF-LH	0.145	0.97
3	RF-LH	0.165	0.94
3	RF-LH	0.16	1.065
3	RF-LH	0.165	1.17
3	RF-LH	0.19	1.35
3	RF-LH	0.165	1.285
3	RF-LH	0.095	1.73
3	RF-LH	0.16	1.38
3	RF-LH		0
3	RF-RH	0.05	1.46
3	RF-RH	0.065	1.28
3	RF-RH	0.07	1.235
3	RF-RH	0.15	1.315
3	RF-RH	0.045	1.17
3	RF-RH	0.135	1.35
3	RF-RH	0.05	1.265
3	RF-RH	0.145	1.325
3	RF-RH	0.155	1.195
3	RF-RH	0.145	1.165
3	RF-RH	0.14	1.165
3	RF-RH	0.15	1.095
3	RF-RH	0.14	1.06
3	RF-RH	0.135	1.045
3	RF-RH	0.135	1.065
3	RF-RH	0.135	1.075
3	RF-RH	0.135	1.07
3	RF-RH	0.135	1.09
3	RF-RH	0.14	1.07
3	RF-RH	0.14	1.09
3	RF-RH	0.155	1.145
3	RF-RH	0.155	1.105
3	RF-RH	0.125	1.08
3	RF-RH	0.12	1.125
3	RF-RH	0.15	1.105
3	RF-RH	0.14	1.07
3	RF-RH	0.135	1.035
3	RF-RH	0.145	1.085
3	RF-RH	0.185	1.22
3	RF-RH	0.135	1.235
3	RF-RH	0.135	1.105
3	RF-RH	0.14	1.12
3	RF-RH	0.15	1.15
3	RF-RH	0.135	1.155
3	RF-RH	0.035	1.115
3	RF-RH	0.025	2.31
3	RF-RH	0.13	1.315
3	RF-RH	0.13	1.235
3	RF-RH	0.155	1.175
3	RF-RH	0.135	1.13
3	RF-RH	0.135	1.265
3	RF-RH	0.105	1.34
3	RF-RH		0
3	RF-RH	0.075	1.22
3	RF-RH	0.055	1.295
3	RF-RH	0.14	1.355
3	RF-RH	0.155	1.25
3	RF-RH	0.06	1.09
3	RF-RH	0.135	1.31
3	RF-RH	0.14	1.27
3	RF-RH	0.025	1.22
3	RF-RH	0.135	1.75
3	RF-RH	0.045	1.19
3	RF-RH	0.045	1.42
3	RF-RH	0.025	1.435
3	RF-RH	0.105	1.41
3	RF-RH	0.05	1.315
3	RF-RH	0.145	1.34
3	RF-RH	0.145	1.14
3	RF-RH	0.14	1.1
3	RF-RH	0.125	1.165
3	RF-RH	0.135	1.25
3	RF-RH		1.325
3	RF-RH		1.69
3	RF-RH	0.065	2.095
3	RF-RH	0.03	2.01
3	RF-RH	0.035	1.29
3	RF-RH	0.06	1.6
3	RF-RH	0.13	1.385
3	RF-RH	0.15	1.165
3	RF-RH	0.135	1.16
3	RF-RH	0.135	1.18
3	RF-RH	0.125	1.225
3	RF-RH	0.115	1.25
3	RF-RH	0.105	1.265
3	RF-RH		0
3	RF-RH	0.2	1.22
3	RF-RH	0.155	1.05
3	RF-RH	0.145	1.04
3	RF-RH	0.13	1.055
3	RF-RH	0.14	1.105
3	RF-RH	0.125	1.09
3	RF-RH	0.13	1.09
3	RF-RH	0.125	1.07
3	RF-RH	0.12	1.055
3	RF-RH	0.125	1.01
3	RF-RH	0.115	0.995
3	RF-RH	0.12	1.05
3	RF-RH	0.125	1.065
3	RF-RH	0.13	1.095
3	RF-RH	0.12	1.105
3	RF-RH	0.13	1.085
3	RF-RH	0.115	1.05
3	RF-RH	0.11	1.02
3	RF-RH	0.12	1.03
3	RF-RH	0.12	1.02
3	RF-RH	0.12	0.98
3	RF-RH	0.12	0.985
3	RF-RH	0.13	1.03
3	RF-RH	0.14	1.075
3	RF-RH	0.145	1.09
3	RF-RH	0.13	1.14
3	RF-RH	0.135	1.205
3	RF-RH	0.145	1.08
3	RF-RH	0.12	1.06
3	RF-RH	0.13	1.065
3	RF-RH	0.135	1.075
3	RF-RH	0.13	1.055
3	RF-RH	0.125	1.055
3	RF-RH	0.125	1.07
3	RF-RH	0.13	1.11
3	RF-RH	0.13	1.15
3	RF-RH		0
3	RF-RH	0.045	1.47
3	RF-RH	0.07	1.27
3	RF-RH	0.055	1.215
3	RF-RH	0.16	1.33
3	RF-RH	0.02	1.61
3	RF-RH	0.04	1.145
3	RF-RH	0.145	1.195
3	RF-RH	0.155	1.09
3	RF-RH	0.14	1.065
3	RF-RH	0.14	1.08
3	RF-RH	0.13	1.19
3	RF-RH	0.13	1.23
3	RF-RH	0.13	1.29
3	RF-RH	0.035	1.71
3	RF-RH		1.37
3	RF-RH	0.15	1.415
3	RF-RH	0.14	1.355
3	RF-RH	0.11	1.41
3	RF-RH	0.12	0.97
3	RF-RH	0.135	0.94
3	RF-RH	0.14	1.065
3	RF-RH	0.13	1.17
3	RF-RH	0.115	1.35
3	RF-RH	0.15	1.285
3	RF-RH	0.035	1.73
3	RF-RH	0.015	1.38
3	RF-RH		0
3	LF-LH	0.04	1.46
3	LF-LH	0.145	1.28
3	LF-LH	0.07	1.235
3	LF-LH	0.07	1.315
3	LF-LH	0.05	1.17
3	LF-LH	0.14	1.35
3	LF-LH	0.05	1.265
3	LF-LH	0.04	1.325
3	LF-LH	0.06	1.195
3	LF-LH	0.11	1.165
3	LF-LH	0.145	1.165
3	LF-LH	0.105	1.095
3	LF-LH	0.13	1.06
3	LF-LH	0.13	1.045
3	LF-LH	0.155	1.065
3	LF-LH	0.135	1.075
3	LF-LH	0.12	1.07
3	LF-LH	0.17	1.09
3	LF-LH	0.125	1.07
[truncated: 11,813 more rows]

## Sheet: tripedal parameters
cow_nr	limb	Var3	Var4
1	no LF	0.265	0.21875
1	no LF	0.16	0.183908
1	no LF	0.255	0.20922
1	no LF	0.16	0.234615
1	no LF	0.24	0.173611
1	no LF	0.155	0.171875
1	no LF	0.145	0.162963
1	no LF	0.155	0.177632
1	no LF	0.165	0.166667
1	no LF	0.12	0.154167
1	no LF	0.115	0.17623
1	no LF	0.275	0.0884354
1	no LF	0.13	0.16129
1	no LF	0.12	0.137037
1	no LF	0.24	0.16609
1	no LF	0.12	0.169231
1	no LF	0.26	0.154362
1	no LF	0.16	0.176471
1	no LF	0.19	0.18251
1	no LF	0.16	0.236162
1	no LF	0.305	0.102389
1	no LF	0.25	0.178947
1	no LF	0.165	0.226054
1	no LF	0.145	0.158798
1	no LF	0.225	0.142336
1	no LF	0.145	0.182482
1	no LF	0.135	0.153543
1	no LF	0.145	0.158672
1	no LF	0.145	0.190635
1	no LF
1	no LF	0.21	0.268551
1	no LF	0.225	0.228669
1	no LF	0.195	0.241107
1	no LF	0.23	0.207692
1	no LF	0.16	0.175732
1	no LF	0.25	0.181818
1	no LF	0.205	0.195122
1	no LF	0.19	0.199115
1	no LF	0.165	0.191304
1	no LF	0.215	0.180723
1	no LF	0.27	0.213235
1	no LF	0.28	0.170968
1	no LF	0.155	0.203647
1	no LF	0.235	0.253049
1	no LF	0.305	0.194175
1	no LF	0.2	0.220339
1	no LF	0.165	0.223827
1	no LF	0.16	0.181818
1	no LF	0.15	0.173759
1	no LF	0.14	0.166667
1	no LF	0.14	0.148289
1	no LF	0.15	0.14652
1	no LF	0.155	0.161404
1	no LF	0.155	0.152239
1	no LF
1	no LF	0.235	0.151394
1	no LF	0.13	0.238532
1	no LF	0.11	0.163717
1	no LF	0.115	0.170213
1	no LF	0.115	0.147826
1	no LF	0.105	0.137931
1	no LF	0.125	0.183333
1	no LF	0.12	0.178862
1	no LF	0.115	0.154762
1	no LF	0.12	0.145833
1	no LF	0.12	0.205882
1	no LF	0.115	0.185185
1	no LF	0.13	0.189723
1	no LF	0.125	0.137652
1	no LF	0.13	0.189873
1	no LF	0.24	0.141869
1	no LF	0.155	0.247706
1	no LF	0.205	0.161417
1	no LF	0.15	0.174603
1	no LF	0.135	0.181034
1	no LF	0.15	0.200837
1	no LF	0.15	0.165992
1	no LF	0.145	0.183267
1	no LF	0.14	0.172691
1	no LF	0.13	0.155102
1	no LF	0.125	0.156379
1	no LF	0.13	0.155303
1	no LF	0.145	0.0786241
1	no LF	0.185	0.2
1	no LF	0.22	0.185315
1	no LF	0.145	0.116352
1	no LF	0.185	0.242991
1	no LF	0.135	0.204
1	no LF	0.27	0.159236
1	no LF	0.145	0.189781
1	no LF	0.135	0.156863
1	no LF	0.125	0.2
1	no LF	0.135	0.163569
1	no LF	0.13	0.210317
1	no LF	0.235	0.192453
1	no LF	0.125	0.171806
1	no LF
1	no RF	0.165	0.21875
1	no RF	0.16	0.183908
1	no RF	0.135	0.20922
1	no RF	0.27	0.234615
1	no RF	0.145	0.173611
1	no RF	0.125	0.171875
1	no RF	0.135	0.162963
1	no RF	0.17	0.177632
1	no RF	0.12	0.166667
1	no RF	0.11	0.154167
1	no RF	0.13	0.17623
1	no RF	0.12	0.0884354
1	no RF	0.12	0.16129
1	no RF	0.29	0.137037
1	no RF	0.14	0.16609
1	no RF	0.125	0.169231
1	no RF	0.14	0.154362
1	no RF	0.295	0.176471
1	no RF	0.26	0.18251
1	no RF	0.265	0.236162
1	no RF	0.21	0.102389
1	no RF	0.235	0.178947
1	no RF	0.135	0.226054
1	no RF	0.125	0.158798
1	no RF	0.135	0.142336
1	no RF	0.245	0.182482
1	no RF	0.125	0.153543
1	no RF	0.14	0.158672
1	no RF	0.145	0.190635
1	no RF
1	no RF	0.26	0.268551
1	no RF	0.285	0.228669
1	no RF	0.165	0.241107
1	no RF	0.17	0.207692
1	no RF	0.15	0.175732
1	no RF	0.15	0.181818
1	no RF	0.23	0.195122
1	no RF	0.195	0.199115
1	no RF	0.205	0.191304
1	no RF	0.215	0.180723
1	no RF	0.24	0.213235
1	no RF	0.245	0.170968
1	no RF	0.29	0.203647
1	no RF	0.32	0.253049
1	no RF	0.26	0.194175
1	no RF	0.17	0.220339
1	no RF	0.135	0.223827
1	no RF	0.155	0.181818
1	no RF	0.235	0.173759
1	no RF	0.25	0.166667
1	no RF	0.13	0.148289
1	no RF	0.13	0.14652
1	no RF	0.135	0.161404
1	no RF	0.33	0.152239
1	no RF
1	no RF	0.25	0.151394
1	no RF	0.14	0.238532
1	no RF	0.105	0.163717
1	no RF	0.11	0.170213
1	no RF	0.12	0.147826
1	no RF	0.11	0.137931
1	no RF	0.13	0.183333
1	no RF	0.13	0.178862
1	no RF	0.13	0.154762
1	no RF	0.125	0.145833
1	no RF	0.105	0.205882
1	no RF	0.135	0.185185
1	no RF	0.135	0.189723
1	no RF	0.185	0.137652
1	no RF	0.245	0.189873
1	no RF	0.19	0.141869
1	no RF	0.15	0.247706
1	no RF	0.115	0.161417
1	no RF	0.145	0.174603
1	no RF	0.15	0.181034
1	no RF	0.14	0.200837
1	no RF	0.15	0.165992
1	no RF	0.135	0.183267
1	no RF	0.13	0.172691
1	no RF	0.12	0.155102
1	no RF	0.125	0.156379
1	no RF	0.14	0.155303
1	no RF	0.23	0.0786241
1	no RF	0.145	0.2
1	no RF	0.13	0.185315
1	no RF	0.22	0.116352
1	no RF	0.18	0.242991
1	no RF	0.145	0.204
1	no RF	0.155	0.159236
1	no RF	0.135	0.189781
1	no RF	0.12	0.156863
1	no RF	0.135	0.2
1	no RF	0.145	0.163569
1	no RF	0.145	0.210317
1	no RF	0.125	0.192453
1	no RF	0.13	0.171806
1	no RF
1	no LH	0.235	0.21875
1	no LH	0.285	0.183908
1	no LH	0.23	0.20922
1	no LH	0.265	0.234615
1	no LH	0.255	0.173611
1	no LH	0.225	0.171875
1	no LH	0.26	0.162963
1	no LH	0.315	0.177632
1	no LH	0.215	0.166667
1	no LH	0.19	0.154167
1	no LH	0.22	0.17623
1	no LH	0.25	0.0884354
1	no LH	0.215	0.16129
1	no LH	0.355	0.137037
1	no LH	0.255	0.16609
1	no LH	0.28	0.169231
1	no LH	0.26	0.154362
1	no LH	0.285	0.176471
1	no LH	0.255	0.18251
1	no LH	0.24	0.236162
1	no LH	0.275	0.102389
1	no LH	0.255	0.178947
1	no LH	0.22	0.226054
1	no LH	0.235	0.158798
1	no LH	0.13	0.142336
1	no LH	0.235	0.182482
1	no LH	0.22	0.153543
1	no LH	0.21	0.158672
1	no LH	0.46	0.190635
1	no LH
1	no LH	0.315	0.268551
1	no LH	0.31	0.228669
1	no LH	0.245	0.241107
1	no LH	0.245	0.207692
1	no LH	0.25	0.175732
1	no LH	0.2	0.181818
1	no LH	0.22	0.195122
1	no LH	0.19	0.199115
1	no LH	0.255	0.191304
1	no LH	0.17	0.180723
1	no LH	0.315	0.213235
1	no LH	0.285	0.170968
1	no LH	0.415	0.203647
1	no LH	0.315	0.253049
1	no LH	0.4	0.194175
1	no LH	0.33	0.220339
1	no LH	0.26	0.223827
1	no LH	0.265	0.181818
1	no LH	0.265	0.173759
1	no LH	0.24	0.166667
1	no LH	0.23	0.148289
1	no LH	0.215	0.14652
1	no LH	0.255	0.161404
1	no LH	0.41	0.152239
1	no LH
1	no LH	0.26	0.151394
1	no LH	0.175	0.238532
1	no LH	0.155	0.163717
1	no LH	0.195	0.170213
1	no LH	0.165	0.147826
1	no LH	0.21	0.137931
1	no LH	0.18	0.183333
1	no LH	0.215	0.178862
1	no LH	0.21	0.154762
1	no LH	0.215	0.145833
1	no LH	0.2	0.205882
1	no LH	0.21	0.185185
1	no LH	0.225	0.189723
1	no LH	0.265	0.137652
1	no LH	0.235	0.189873
1	no LH	0.295	0.141869
1	no LH	0.22	0.247706
1	no LH	0.23	0.161417
1	no LH	0.205	0.174603
1	no LH	0.195	0.181034
1	no LH	0.175	0.200837
1	no LH	0.21	0.165992
1	no LH	0.215	0.183267
1	no LH	0.17	0.172691
1	no LH	0.2	0.155102
1	no LH	0.165	0.156379
1	no LH	0.24	0.155303
1	no LH	0.91	0.0786241
1	no LH	0.295	0.2
1	no LH	0.265	0.185315
1	no LH	0.325	0.116352
1	no LH	0.29	0.242991
1	no LH	0.27	0.204
1	no LH	0.28	0.159236
1	no LH	0.26	0.189781
1	no LH	0.23	0.156863
1	no LH	0.28	0.2
1	no LH	0.26	0.163569
1	no LH	0.25	0.210317
1	no LH	0.2	0.192453
1	no LH	0.185	0.171806
1	no LH
1	no RH	0.28	0.21875
1	no RH	0.24	0.183908
1	no RH	0.295	0.20922
1	no RH	0.305	0.234615
1	no RH	0.25	0.173611
1	no RH	0.22	0.171875
1	no RH	0.22	0.162963
1	no RH	0.27	0.177632
1	no RH	0.205	0.166667
1	no RH	0.185	0.154167
1	no RH	0.215	0.17623
1	no RH	0.13	0.0884354
1	no RH	0.2	0.16129
1	no RH	0.185	0.137037
1	no RH	0.24	0.16609
1	no RH	0.22	0.169231
1	no RH	0.23	0.154362
1	no RH	0.255	0.176471
1	no RH	0.24	0.18251
1	no RH	0.32	0.236162
1	no RH	0.15	0.102389
1	no RH	0.255	0.178947
1	no RH	0.295	0.226054
1	no RH	0.185	0.158798
1	no RH	0.195	0.142336
1	no RH	0.25	0.182482
1	no RH	0.195	0.153543
1	no RH	0.215	0.158672
1	no RH	0.285	0.190635
1	no RH
1	no RH	0.38	0.268551
1	no RH	0.335	0.228669
1	no RH	0.305	0.241107
1	no RH	0.27	0.207692
1	no RH	0.21	0.175732
1	no RH	0.22	0.181818
1	no RH	0.24	0.195122
1	no RH	0.225	0.199115
1	no RH	0.22	0.191304
1	no RH	0.225	0.180723
1	no RH	0.29	0.213235
1	no RH	0.265	0.170968
1	no RH	0.335	0.203647
1	no RH	0.415	0.253049
1	no RH	0.3	0.194175
1	no RH	0.325	0.220339
1	no RH	0.31	0.223827
1	no RH	0.26	0.181818
1	no RH	0.245	0.173759
1	no RH	0.225	0.166667
1	no RH	0.195	0.148289
1	no RH	0.2	0.14652
1	no RH	0.23	0.161404
1	no RH	0.255	0.152239
1	no RH
1	no RH	0.19	0.151394
1	no RH	0.26	0.238532
1	no RH	0.185	0.163717
1	no RH	0.2	0.170213
1	no RH	0.17	0.147826
1	no RH	0.16	0.137931
1	no RH	0.22	0.183333
1	no RH	0.22	0.178862
1	no RH	0.195	0.154762
1	no RH	0.175	0.145833
1	no RH	0.245	0.205882
1	no RH	0.225	0.185185
1	no RH	0.24	0.189723
1	no RH	0.17	0.137652
1	no RH	0.225	0.189873
1	no RH	0.205	0.141869
1	no RH	0.27	0.247706
1	no RH	0.205	0.161417
1	no RH	0.22	0.174603
1	no RH	0.21	0.181034
1	no RH	0.24	0.200837
1	no RH	0.205	0.165992
1	no RH	0.23	0.183267
1	no RH	0.215	0.172691
1	no RH	0.19	0.155102
1	no RH	0.19	0.156379
1	no RH	0.205	0.155303
1	no RH	0.16	0.0786241
1	no RH	0.27	0.2
1	no RH	0.265	0.185315
1	no RH	0.185	0.116352
1	no RH	0.39	0.242991
1	no RH	0.255	0.204
1	no RH	0.25	0.159236
1	no RH	0.26	0.189781
1	no RH	0.2	0.156863
1	no RH	0.265	0.2
1	no RH	0.22	0.163569
1	no RH	0.265	0.210317
1	no RH	0.255	0.192453
1	no RH	0.195	0.171806
1	no RH
2	no LF	0.135	0.181102
2	no LF	0.255	0.183099
2	no LF		0.185065
2	no LF	0.32	0.206349
2	no LF	0.29	0.207668
2	no LF		0.197492
2	no LF	0.215	0.246429
2	no LF	0.315	0.191126
2	no LF	0.3	0.189655
2	no LF		0.189369
2	no LF	0.31	0.213816
2	no LF		0.184466
2	no LF	0.33	0.232198
2	no LF	0.325	0.212903
2	no LF		0.197324
2	no LF	0.305	0.17931
2	no LF		0.195286
2	no LF	0.295	0.188153
2	no LF	0.305	0.227119
2	no LF	0.295	0.221053
2	no LF	0.295	0.222222
2	no LF	0.295	0.192171
2	no LF	0.285	0.21
2	no LF	0.17	0.232824
2	no LF	0.3	0.190311
2	no LF	0.3	0.180328
2	no LF	0.35	0.185304
2	no LF		0.179245
2	no LF	0.185	0.216117
2	no LF	0.315	0.202091
2	no LF	0.26	0.214815
2	no LF	0.28	0.173432
2	no LF	0.29	0.167832
2	no LF	0.315	0.216828
2	no LF	0.19	0.171103
2	no LF	0.305	0.159236
2	no LF	0.205	0.207407
2	no LF	0.275	0.181818
2	no LF		0.179153
2	no LF	0.185	0.219424
2	no LF
2	no LF	0.295	0.211838
2	no LF	0.325	0.191693
2	no LF	0.315	0.183673
2	no LF	0.175	0.228
2	no LF	0.3	0.195122
2	no LF	0.305	0.164286
2	no LF	0.305	0.191638
2	no LF	0.295	0.190311
2	no LF	0.295	0.184713
2	no LF	0.35	0.323864
2	no LF	0.305	0.176292
2	no LF	0.295	0.17193
2	no LF	0.3	0.192171
2	no LF	0.325	0.195364
2	no LF	0.305	0.216028
2	no LF	0.31	0.236066
2	no LF		0.232082
2	no LF	0.3	0.221843
2	no LF		0.168831
2	no LF	0.17	0.204545
2	no LF	0.3	0.2
2	no LF	0.31	0.18543
2	no LF		0.188976
2	no LF	0.265	0.303514
2	no LF		0.198052
2	no LF	0.345	0.219436
2	no LF	0.31	0.243402
2	no LF		0.214984
2	no LF	0.305	0.211409
2	no LF	0.315	0.203448
2	no LF	0.3	0.172881
2	no LF		0.190184
2	no LF	0.195	0.208791
2	no LF	0.31	0.192182
2	no LF	0.33	0.208914
2	no LF		0.242358
2	no LF	0.445	0.259947
2	no LF		0.216895
2	no LF	0.345	0.27003
2	no LF	0.335	0.210863
2	no LF
2	no LF	0.3	0.168421
2	no LF		0.221088
2	no LF	0.275	0.167883
2	no LF	0.285	0.197183
2	no LF	0.31	0.171617
2	no LF	0.185	0.203922
2	no LF	0.25	0.183521
2	no LF		0.181818
2	no LF	0.155	0.191235
2	no LF	0.295	0.193772
2	no LF		0.180887
2	no LF	0.32	0.167785
2	no LF	0.325	0.189831
2	no LF	0.305	0.194539
2	no LF	0.29	0.17931
2	no LF	0.29	0.164336
2	no LF		0.153025
2	no LF	0.285	0.152318
2	no LF	0.17	0.173387
2	no LF	0.3	0.146259
2	no LF	0.17	0.168498
2	no LF	0.16	0.186131
2	no LF	0.17	0.179487
2	no LF	0.165	0.181452
2	no LF		0.179487
2	no LF	0.28	0.177122
2	no LF	0.275	0.168498
2	no LF		0.179661
2	no LF	0.405	0.289817
2	no LF	0.275	0.225
2	no LF	0.3	0.204301
2	no LF		0.217712
2	no LF	0.275	0.15625
2	no LF	0.165	0.186992
2	no LF	0.28	0.165541
2	no LF	0.16	0.194946
2	no LF	0.19	0.168459
2	no LF	0.165	0.211765
2	no LF	0.3	0.199336
2	no LF	0.165	0.196787
2	no LF	0.265	0.172881
2	no LF	0.165	0.184739
2	no LF
2	no LF	0.28	0.265018
2	no LF	0.295	0.230769
2	no LF	0.295	0.266881
2	no LF	0.31	0.232787
2	no LF	0.27	0.214022
2	no LF	0.255	0.207746
2	no LF		0.198675
2	no LF	0.3	0.22623
2	no LF	0.305	0.185759
2	no LF	0.19	0.225092
2	no LF	0.31	0.238255
2	no LF	0.28	0.189964
2	no LF	0.275	0.212014
2	no LF	0.28	0.207237
2	no LF	0.18	0.238636
2	no LF	0.26	0.213483
2	no LF	0.26	0.197917
2	no LF	0.135	0.207692
2	no LF	0.125	0.210526
2	no LF	0.13	0.216814
2	no LF	0.215	0.181467
2	no LF	0.125	0.194093
2	no LF	0.11	0.2
2	no LF	0.12	0.194332
2	no LF	0.135	0.219917
2	no LF	0.25	0.169811
2	no LF	0.27	0.211679
2	no LF	0.275	0.225092
2	no LF	0.265	0.183824
2	no LF	0.265	0.205479
2	no LF	0.145	0.228571
2	no LF	0.275	0.18315
2	no LF	0.26	0.221805
2	no LF	0.235	0.14652
2	no LF	0.115	0.192469
2	no LF	0.265	0.212996
2	no LF	0.27	0.219424
2	no LF	0.27	0.194139
2	no LF	0.27	0.227437
2	no LF	0.29	0.216393
2	no LF	0.15	0.224409
2	no LF	0.27	0.180851
2	no LF	0.28	0.210526
2	no LF	0.295	0.230508
2	no LF	0.315	0.188312
2	no LF
2	no LF	0.245	0.192727
2	no LF	0.105	0.120603
2	no LF	0.05	0.155378
2	no LF	0.285	0.171329
2	no LF	0.12	0.164557
2	no LF	0.14	0.169065
2	no LF	0.17	0.227106
2	no LF	0.295	0.186275
2	no LF	0.32	0.253918
2	no LF	0.305	0.232198
2	no LF		0.239264
2	no LF	0.305	0.211538
2	no LF	0.225	0.206061
2	no LF	0.195	0.23871
2	no LF	0.205	0.199346
2	no LF	0.17	0.233333
2	no LF	0.18	0.235294
2	no LF	0.28	0.202492
2	no LF	0.2	0.258621
2	no LF	0.315	0.236776
2	no LF		0.2
2	no LF	0.285	0.209524
2	no LF	0.15	0.206107
2	no LF	0.135	0.226891
2	no LF	0.08	0.184874
2	no LF	0.125	0.227468
2	no LF	0.24	0.203008
2	no LF	0.255	0.205128
2	no LF	0.255	0.19661
2	no LF	0.14	0.228916
2	no LF	0.29	0.159574
2	no LF	0.27	0.225806
2	no LF	0.28	0.187943
2	no LF	0.3	0.194805
2	no LF	0.315	0.234114
2	no LF	0.285	0.191882
2	no LF	0.265	0.21223
2	no LF	0.415
2	no LF
2	no LF	0.275	0.188811
2	no LF	0.285	0.212121
2	no LF	0.145	0.245902
2	no LF	0.24	0.166078
2	no LF	0.135	0.221774
2	no LF	0.25	0.178832
2	no LF	0.255	0.184932
2	no LF	0.145	0.197719
2	no LF	0.145	0.181818
2	no LF	0.26	0.202166
2	no LF	0.265	0.166102
2	no LF	0.13	0.197581
2	no LF	0.11	0.164062
2	no LF	0.145	0.223108
2	no LF	0.275	0.19697
2	no LF	0.085	0.125
2	no LF	0.11	0.124464
2	no LF	0.095	0.140969
2	no LF	0.105	0.193966
2	no LF	0.24	0.155556
2	no LF	0.125	0.198312
2	no LF	0.095	0.139918
2	no LF	0.115	0.205882
2	no LF	0.1	0.134783
2	no LF	0.1	0.173387
2	no LF	0.095	0.141667
2	no LF	0.115	0.174419
2	no LF	0.12	0.23176
2	no LF	0.265	0.211896
2	no LF	0.245	0.200692
2	no LF	0.145	0.228346
2	no LF	0.12	0.212851
2	no LF	0.115	0.168724
2	no LF	0.115	0.148594
2	no LF	0.115	0.163265
2	no LF	0.11	0.160338
2	no LF
2	no LF	0.24	0.158416
2	no LF	0.235	0.300885
2	no LF	0.295	0.144487
2	no LF	0.24	0.239482
2	no LF		0.215385
2	no LF	0.16	0.233202
2	no LF	0.305	0.254777
2	no LF	0.34	0.18323
2	no LF	0.325	0.200599
2	no LF		0.267568
2	no LF	0.515	0.251244
2	no LF	0.315	0.238606
2	no LF	0.435	0.297368
2	no LF		0.230088
2	no LF	0.215	0.266871
2	no LF		0.255102
2	no LF	0.43	0.228628
2	no LF	0.115	0.217252
2	no LF	0.255	0.241888
2	no LF		0.264205
2	no LF	0.355	0.247159
2	no LF		0.197297
2	no LF	0.295	0.311346
2	no LF	0.36	0.180451
2	no LF	0.345	0.320225
2	no LF		0.268698
2	no LF	0.33	0.246201
2	no LF	0.355	0.253165
2	no LF	0.33	0.238671
2	no LF		0.247839
2	no LF	0.355	0.248466
2	no LF	0.325	0.197952
2	no LF	0.28	0.235294
2	no LF	0.305	0.186441
2	no LF	0.315	0.203947
2	no LF	0.33	0.20712
2	no LF	0.335	0.247588
2	no LF	0.32	0.248408
2	no LF		0.23871
2	no LF	0.315	0.223684
2	no LF	0.31	0.230769
2	no LF	0.315	0.228956
2	no LF	0.3	0.21843
2	no LF	0.305	0.227425
2	no LF	0.34	0.21519
2	no LF
2	no RF	0.265	0.181102
2	no RF	0.27	0.183099
2	no RF	0.295	0.185065
2	no RF	0.295	0.206349
2	no RF	0.155	0.207668
2	no RF	0.22	0.197492
2	no RF	0.14	0.246429
2	no RF	0.145	0.191126
2	no RF	0.275	0.189655
2	no RF	0.265	0.189369
2	no RF	0.135	0.213816
2	no RF	0.305	0.184466
2	no RF	0.215	0.232198
2	no RF	0.315	0.212903
2	no RF	0.285	0.197324
2	no RF	0.26	0.17931
2	no RF	0.29	0.195286
2	no RF	0.285	0.188153
2	no RF	0.28	0.227119
2	no RF	0.275	0.221053
2	no RF	0.285	0.222222
2	no RF	0.275	0.192171
2	no RF	0.295	0.21
2	no RF	0.28	0.232824
2	no RF	0.29	0.190311
2	no RF	0.31	0.180328
2	no RF	0.29	0.185304
2	no RF	0.295	0.179245
2	no RF	0.29	0.216117
2	no RF	0.28	0.202091
2	no RF	0.265	0.214815
2	no RF	0.27	0.173432
2	no RF	0.25	0.167832
2	no RF	0.295	0.216828
2	no RF	0.28	0.171103
2	no RF	0.27	0.159236
2	no RF	0.28	0.207407
2	no RF	0.315	0.181818
2	no RF	0.3	0.179153
2	no RF	0.3	0.219424
2	no RF
2	no RF	0.16	0.211838
2	no RF	0.27	0.191693
2	no RF	0.15	0.183673
2	no RF	0.255	0.228
2	no RF	0.275	0.195122
2	no RF	0.275	0.164286
2	no RF	0.28	0.191638
2	no RF	0.29	0.190311
2	no RF	0.29	0.184713
2	no RF	0.185	0.323864
2	no RF	0.18	0.176292
2	no RF	0.29	0.17193
2	no RF	0.27	0.192171
2	no RF	0.245	0.195364
2	no RF	0.275	0.216028
2	no RF	0.3	0.236066
2	no RF	0.29	0.232082
2	no RF	0.3	0.221843
2	no RF	0.28	0.168831
2	no RF	0.285	0.204545
2	no RF	0.28	0.2
2	no RF	0.3	0.18543
2	no RF	0.3	0.188976
2	no RF	0.185	0.303514
2	no RF	0.315	0.198052
2	no RF	0.3	0.219436
2	no RF	0.17	0.243402
2	no RF	0.165	0.214984
2	no RF	0.305	0.211409
2	no RF	0.295	0.203448
2	no RF	0.28	0.172881
2	no RF	0.26	0.190184
2	no RF	0.265	0.208791
2	no RF	0.29	0.192182
2	no RF	0.305	0.208914
2	no RF	0.25	0.242358
2	no RF	0.205	0.259947
2	no RF	0.315	0.216895
2	no RF	0.365	0.27003
2	no RF	0.315	0.210863
2	no RF
2	no RF	0.205	0.168421
2	no RF	0.13	0.221088
2	no RF	0.265	0.167883
2	no RF	0.265	0.197183
2	no RF	0.27	0.171617
2	no RF	0.25	0.203922
2	no RF	0.26	0.183521
2	no RF	0.27	0.181818
2	no RF	0.24	0.191235
2	no RF	0.275	0.193772
2	no RF	0.255	0.180887
2	no RF	0.27	0.167785
2	no RF	0.19	0.189831
2	no RF	0.275	0.194539
2	no RF	0.255	0.17931
2	no RF	0.275	0.164336
2	no RF	0.265	0.153025
2	no RF	0.24	0.152318
2	no RF	0.245	0.173387
2	no RF	0.26	0.146259
2	no RF	0.265	0.168498
2	no RF	0.245	0.186131
2	no RF	0.24	0.179487
2	no RF	0.26	0.181452
2	no RF	0.25	0.179487
2	no RF	0.27	0.177122
2	no RF	0.26	0.168498
2	no RF	0.275	0.179661
2	no RF	0.2	0.289817
2	no RF	0.255	0.225
2	no RF	0.26	0.204301
2	no RF	0.255	0.217712
2	no RF	0.255	0.15625
2	no RF	0.25	0.186992
2	no RF	0.265	0.165541
2	no RF	0.27	0.194946
2	no RF	0.29	0.168459
2	no RF	0.28	0.211765
2	no RF	0.255	0.199336
2	no RF	0.275	0.196787
2	no RF	0.265	0.172881
2	no RF	0.25	0.184739
2	no RF
2	no RF	0.235	0.265018
2	no RF	0.3	0.230769
2	no RF	0.155	0.266881
2	no RF	0.295	0.232787
2	no RF	0.26	0.214022
2	no RF	0.255	0.207746
2	no RF	0.15	0.198675
2	no RF	0.31	0.22623
2	no RF	0.21	0.185759
2	no RF	0.26	0.225092
2	no RF	0.15	0.238255
2	no RF	0.265	0.189964
2	no RF	0.275	0.212014
2	no RF	0.14	0.207237
2	no RF	0.28	0.238636
2	no RF	0.245	0.213483
2	no RF	0.24	0.197917
2	no RF	0.22	0.207692
2	no RF	0.2	0.210526
2	no RF	0.21	0.216814
2	no RF	0.215	0.181467
2	no RF	0.2	0.194093
2	no RF	0.2	0.2
2	no RF	0.205	0.194332
2	no RF	0.225	0.219917
2	no RF	0.24	0.169811
2	no RF	0.24	0.211679
2	no RF	0.25	0.225092
2	no RF	0.27	0.183824
2	no RF	0.255	0.205479
2	no RF	0.245	0.228571
2	no RF	0.26	0.18315
2	no RF	0.245	0.221805
2	no RF	0.22	0.14652
2	no RF	0.225	0.192469
2	no RF	0.26	0.212996
2	no RF	0.28	0.219424
2	no RF	0.24	0.194139
2	no RF	0.28	0.227437
2	no RF	0.295	0.216393
2	no RF	0.275	0.224409
2	no RF	0.275	0.180851
2	no RF	0.25	0.210526
2	no RF	0.275	0.230508
2	no RF	0.145	0.188312
2	no RF
2	no RF	0.12	0.192727
2	no RF	0.125	0.120603
2	no RF	0.22	0.155378
2	no RF	0.2	0.171329
2	no RF	0.185	0.164557
2	no RF	0.25	0.169065
2	no RF	0.2	0.227106
2	no RF	0.285	0.186275
2	no RF	0.235	0.253918
2	no RF	0.31	0.232198
2	no RF	0.17	0.239264
2	no RF	0.2	0.211538
2	no RF	0.29	0.206061
2	no RF	0.33	0.23871
2	no RF	0.305	0.199346
2	no RF	0.305	0.233333
2	no RF	0.295	0.235294
2	no RF	0.28	0.202492
2	no RF	0.17	0.258621
2	no RF	0.305	0.236776
2	no RF	0.145	0.2
2	no RF	0.295	0.209524
2	no RF	0.215	0.206107
2	no RF	0.085	0.226891
2	no RF	0.17	0.184874
2	no RF	0.24	0.227468
2	no RF	0.25	0.203008
2	no RF	0.255	0.205128
2	no RF	0.26	0.19661
2	no RF	0.25	0.228916
2	no RF	0.235	0.159574
2	no RF	0.265	0.225806
2	no RF	0.235	0.187943
2	no RF	0.3	0.194805
2	no RF	0.29	0.234114
2	no RF	0.255	0.191882
2	no RF	0.265	0.21223
2	no RF	0.28
2	no RF
2	no RF	0.28	0.188811
2	no RF	0.26	0.212121
2	no RF	0.225	0.245902
2	no RF	0.23	0.166078
2	no RF	0.235	0.221774
2	no RF	0.24	0.178832
2	no RF	0.235	0.184932
2	no RF	0.22	0.197719
2	no RF	0.245	0.181818
2	no RF	0.255	0.202166
2	no RF	0.25	0.166102
2	no RF	0.205	0.197581
2	no RF	0.21	0.164062
2	no RF	0.255	0.223108
2	no RF	0.095	0.19697
2	no RF	0.18	0.125
2	no RF	0.21	0.124464
2	no RF	0.075	0.140969
2	no RF	0.23	0.193966
2	no RF	0.205	0.155556
2	no RF	0.175	0.198312
2	no RF	0.21	0.139918
2	no RF	0.195	0.205882
2	no RF	0.085	0.134783
2	no RF	0.225	0.173387
2	no RF	0.205	0.141667
2	no RF	0.245	0.174419
2	no RF	0.23	0.23176
2	no RF	0.205	0.211896
2	no RF	0.255	0.200692
2	no RF	0.125	0.228346
2	no RF	0.225	0.212851
2	no RF	0.205	0.168724
2	no RF	0.215	0.148594
2	no RF	0.195	0.163265
2	no RF	0.19	0.160338
2	no RF
2	no RF	0.26	0.158416
2	no RF	0.27	0.300885
2	no RF	0.13	0.144487
2	no RF	0.34	0.239482
2	no RF	0.2	0.215385
2	no RF	0.26	0.233202
2	no RF	0.165	0.254777
2	no RF	0.305	0.18323
2	no RF	0.295	0.200599
2	no RF	0.285	0.267568
2	no RF	0.33	0.251244
2	no RF	0.3	0.238606
2	no RF	0.24	0.297368
2	no RF	0.195	0.230088
2	no RF	0.24	0.266871
2	no RF	0.39	0.255102
2	no RF	0.215	0.228628
2	no RF	0.165	0.217252
2	no RF	0.28	0.241888
2	no RF	0.23	0.264205
2	no RF	0.27	0.247159
2	no RF	0.28	0.197297
2	no RF	0.37	0.311346
2	no RF	0.395	0.180451
2	no RF	0.225	0.320225
2	no RF	0.26	0.268698
2	no RF	0.32	0.246201
2	no RF	0.295	0.253165
2	no RF	0.335	0.238671
2	no RF	0.2	0.247839
2	no RF	0.325	0.248466
2	no RF	0.17	0.197952
2	no RF	0.29	0.235294
2	no RF	0.31	0.186441
2	no RF	0.32	0.203947
2	no RF	0.305	0.20712
2	no RF	0.32	0.247588
2	no RF	0.34	0.248408
2	no RF	0.32	0.23871
2	no RF	0.31	0.223684
2	no RF	0.285	0.230769
2	no RF	0.295	0.228956
2	no RF	0.29	0.21843
2	no RF	0.29	0.227425
2	no RF	0.28	0.21519
2	no RF
2	no LH	0.275	0.181102
2	no LH	0.255	0.183099
2	no LH	0.285	0.185065
2	no LH	0.305	0.206349
2	no LH	0.31	0.207668
2	no LH	0.25	0.197492
2	no LH	0.305	0.246429
2	no LH	0.29	0.191126
2	no LH	0.245	0.189655
2	no LH	0.305	0.189369
2	no LH	0.305	0.213816
2	no LH	0.28	0.184466
2	no LH	0.345	0.232198
2	no LH	0.29	0.212903
2	no LH	0.275	0.197324
2	no LH	0.31	0.17931
2	no LH	0.285	0.195286
2	no LH	0.3	0.188153
2	no LH	0.27	0.227119
2	no LH	0.26	0.221053
2	no LH	0.275	0.222222
2	no LH	0.25	0.192171
2	no LH	0.24	0.21
2	no LH	0.255	0.232824
2	no LH	0.27	0.190311
2	no LH	0.295	0.180328
2	no LH	0.325	0.185304
2	no LH	0.26	0.179245
2	no LH	0.295	0.216117
2	no LH	0.235	0.202091
2	no LH	0.29	0.214815
2	no LH	0.235	0.173432
2	no LH	0.305	0.167832
2	no LH	0.31	0.216828
2	no LH	0.305	0.171103
2	no LH	0.27	0.159236
2	no LH	0.25	0.207407
2	no LH	0.285	0.181818
2	no LH	0.27	0.179153
2	no LH	0.26	0.219424
2	no LH
2	no LH	0.275	0.211838
2	no LH	0.34	0.191693
2	no LH	0.315	0.183673
2	no LH	0.285	0.228
2	no LH	0.26	0.195122
2	no LH	0.255	0.164286
2	no LH	0.265	0.191638
2	no LH	0.26	0.190311
2	no LH	0.345	0.184713
2	no LH	0.345	0.323864
2	no LH	0.34	0.176292
2	no LH	0.26	0.17193
2	no LH	0.28	0.192171
2	no LH	0.325	0.195364
2	no LH	0.28	0.216028
2	no LH	0.32	0.236066
2	no LH	0.27	0.232082
2	no LH	0.265	0.221843
2	no LH	0.25	0.168831
2	no LH	0.25	0.204545
2	no LH	0.285	0.2
2	no LH	0.275	0.18543
2	no LH	0.385	0.188976
2	no LH	0.37	0.303514
2	no LH	0.335	0.198052
2	no LH	0.31	0.219436
2	no LH	0.335	0.243402
2	no LH	0.225	0.214984
2	no LH	0.25	0.211409
2	no LH	0.265	0.203448
2	no LH	0.27	0.172881
2	no LH	0.265	0.190184
2	no LH	0.265	0.208791
2	no LH	0.28	0.192182
2	no LH	0.405	0.208914
2	no LH	0.685	0.242358
2	no LH	0.335	0.259947
2	no LH	0.565	0.216895
2	no LH	0.32	0.27003
2	no LH	0.3	0.210863
2	no LH
2	no LH	0.365	0.168421
2	no LH	0.22	0.221088
2	no LH	0.225	0.167883
2	no LH	0.26	0.197183
2	no LH	0.235	0.171617
2	no LH	0.205	0.203922
2	no LH	0.225	0.183521
2	no LH	0.255	0.181818
2	no LH	0.255	0.191235
2	no LH	0.25	0.193772
2	no LH	0.235	0.180887
2	no LH	0.265	0.167785
2	no LH	0.27	0.189831
2	no LH	0.25	0.194539
2	no LH	0.25	0.17931
2	no LH	0.245	0.164336
2	no LH	0.24	0.153025
2	no LH	0.235	0.152318
2	no LH	0.225	0.173387
2	no LH	0.125	0.146259
2	no LH	0.255	0.168498
2	no LH	0.2	0.186131
2	no LH	0.255	0.179487
2	no LH	0.215	0.181452
2	no LH	0.225	0.179487
2	no LH	0.215	0.177122
2	no LH	0.23	0.168498
2	no LH	0.295	0.179661
2	no LH	0.265	0.289817
2	no LH	0.29	0.225
2	no LH	0.26	0.204301
2	no LH	0.215	0.217712
2	no LH	0.2	0.15625
2	no LH	0.235	0.186992
2	no LH	0.21	0.165541
2	no LH	0.26	0.194946
2	no LH	0.215	0.168459
2	no LH	0.21	0.211765
2	no LH	0.235	0.199336
2	no LH	0.265	0.196787
2	no LH	0.23	0.172881
2	no LH	0.135	0.184739
2	no LH
2	no LH	0.335	0.265018
2	no LH	0.27	0.230769
2	no LH	0.315	0.266881
2	no LH	0.285	0.232787
2	no LH	0.245	0.214022
2	no LH	0.275	0.207746
2	no LH	0.26	0.198675
2	no LH	0.3	0.22623
2	no LH	0.285	0.185759
2	no LH	0.315	0.225092
2	no LH	0.215	0.238255
2	no LH	0.25	0.189964
2	no LH	0.285	0.212014
2	no LH	0.245	0.207237
2	no LH	0.245	0.238636
2	no LH	0.21	0.213483
2	no LH	0.2	0.197917
2	no LH	0.17	0.207692
2	no LH	0.225	0.210526
2	no LH	0.175	0.216814
2	no LH	0.155	0.181467
2	no LH	0.17	0.194093
2	no LH	0.18	0.2
2	no LH	0.165	0.194332
2	no LH	0.2	0.219917
2	no LH	0.22	0.169811
2	no LH	0.235	0.211679
2	no LH	0.215	0.225092
2	no LH	0.22	0.183824
2	no LH	0.22	0.205479
2	no LH	0.22	0.228571
2	no LH	0.22	0.18315
2	no LH	0.21	0.221805
2	no LH	0.23	0.14652
2	no LH	0.205	0.192469
2	no LH	0.255	0.212996
2	no LH	0.225	0.219424
2	no LH	0.255	0.194139
2	no LH	0.25	0.227437
2	no LH	0.26	0.216393
2	no LH	0.235	0.224409
2	no LH	0.235	0.180851
2	no LH	0.275	0.210526
2	no LH	0.27	0.230508
2	no LH	0.28	0.188312
2	no LH
2	no LH	0.175	0.192727
2	no LH	0.09	0.120603
2	no LH	0.325	0.155378
2	no LH	0.205	0.171329
2	no LH	0.21	0.164557
2	no LH	0.25	0.169065
2	no LH	0.33	0.227106
2	no LH	0.31	0.186275
2	no LH	0.275	0.253918
2	no LH	0.35	0.232198
2	no LH	0.31	0.239264
2	no LH	0.365	0.211538
2	no LH	0.285	0.206061
2	no LH	0.325	0.23871
2	no LH	0.255	0.199346
2	no LH	0.265	0.233333
2	no LH	0.28	0.235294
2	no LH	0.305	0.202492
2	no LH	0.285	0.258621
2	no LH	0.52	0.236776
2	no LH	0.22	0.2
2	no LH	0.215	0.209524
2	no LH	0.2	0.206107
2	no LH	0.135	0.226891
2	no LH	0.185	0.184874
2	no LH	0.215	0.227468
2	no LH	0.22	0.203008
2	no LH	0.22	0.205128
2	no LH	0.21	0.19661
2	no LH	0.23	0.228916
2	no LH	0.21	0.159574
2	no LH	0.23	0.225806
2	no LH	0.265	0.187943
2	no LH	0.245	0.194805
2	no LH	0.225	0.234114
2	no LH	0.2	0.191882
2	no LH	0.265	0.21223
2	no LH	0.235
2	no LH
2	no LH	0.24	0.188811
2	no LH	0.215	0.212121
2	no LH	0.195	0.245902
2	no LH	0.22	0.166078
2	no LH	0.235	0.221774
2	no LH	0.235	0.178832
2	no LH	0.245	0.184932
2	no LH	0.225	0.197719
2	no LH	0.265	0.181818
2	no LH	0.25	0.202166
2	no LH	0.23	0.166102
2	no LH	0.175	0.197581
2	no LH	0.195	0.164062
2	no LH	0.23	0.223108
2	no LH	0.09	0.19697
2	no LH	0.165	0.125
2	no LH	0.155	0.124464
2	no LH	0.14	0.140969
2	no LH	0.185	0.193966
2	no LH	0.18	0.155556
2	no LH	0.15	0.198312
2	no LH	0.17	0.139918
2	no LH	0.125	0.205882
2	no LH	0.165	0.134783
2	no LH	0.165	0.173387
2	no LH	0.19	0.141667
2	no LH	0.185	0.174419
2	no LH	0.215	0.23176
2	no LH	0.24	0.211896
2	no LH	0.235	0.200692
2	no LH	0.175	0.228346
2	no LH	0.185	0.212851
2	no LH	0.165	0.168724
2	no LH	0.19	0.148594
2	no LH	0.195	0.163265
2	no LH	0.15	0.160338
2	no LH
2	no LH	0.19	0.158416
2	no LH	0.37	0.300885
2	no LH	0.2	0.144487
2	no LH	0.36	0.239482
2	no LH	0.24	0.215385
2	no LH	0.24	0.233202
2	no LH	0.275	0.254777
2	no LH	0.335	0.18323
2	no LH	0.335	0.200599
2	no LH	0.44	0.267568
2	no LH	0.465	0.251244
2	no LH	0.47	0.238606
2	no LH	0.43	0.297368
2	no LH	0.29	0.230088
2	no LH	0.435	0.266871
2	no LH	0.43	0.255102
2	no LH	0.235	0.228628
2	no LH	0.39	0.217252
2	no LH	0.39	0.241888
2	no LH	0.375	0.264205
2	no LH	0.4	0.247159
2	no LH	0.39	0.197297
2	no LH	0.465	0.311346
2	no LH	0.47	0.180451
2	no LH	0.375	0.320225
2	no LH	0.4	0.268698
2	no LH	0.305	0.246201
2	no LH	0.31	0.253165
2	no LH	0.365	0.238671
2	no LH	0.365	0.247839
2	no LH	0.27	0.248466
2	no LH	0.22	0.197952
2	no LH	0.245	0.235294
2	no LH	0.245	0.186441
2	no LH	0.27	0.203947
2	no LH	0.27	0.20712
2	no LH	0.24	0.247588
2	no LH	0.315	0.248408
2	no LH	0.295	0.23871
2	no LH	0.26	0.223684
2	no LH	0.31	0.230769
2	no LH	0.265	0.228956
2	no LH	0.26	0.21843
2	no LH	0.33	0.227425
2	no LH	0.33	0.21519
2	no LH
2	no RH	0.23	0.181102
2	no RH	0.26	0.183099
2	no RH	0.285	0.185065
2	no RH	0.325	0.206349
2	no RH	0.325	0.207668
2	no RH	0.315	0.197492
2	no RH	0.345	0.246429
2	no RH	0.28	0.191126
2	no RH	0.275	0.189655
2	no RH	0.285	0.189369
2	no RH	0.325	0.213816
2	no RH	0.285	0.184466
2	no RH	0.375	0.232198
2	no RH	0.33	0.212903
2	no RH	0.295	0.197324
2	no RH	0.26	0.17931
2	no RH	0.29	0.195286
2	no RH	0.27	0.188153
2	no RH	0.335	0.227119
2	no RH	0.315	0.221053
2	no RH	0.32	0.222222
2	no RH	0.27	0.192171
2	no RH	0.315	0.21
2	no RH	0.305	0.232824
2	no RH	0.275	0.190311
2	no RH	0.275	0.180328
2	no RH	0.29	0.185304
2	no RH	0.285	0.179245
2	no RH	0.295	0.216117
2	no RH	0.29	0.202091
2	no RH	0.29	0.214815
2	no RH	0.235	0.173432
2	no RH	0.24	0.167832
2	no RH	0.335	0.216828
2	no RH	0.225	0.171103
2	no RH	0.25	0.159236
2	no RH	0.28	0.207407
2	no RH	0.27	0.181818
2	no RH	0.275	0.179153
2	no RH	0.305	0.219424
2	no RH
2	no RH	0.34	0.211838
2	no RH	0.3	0.191693
2	no RH	0.315	0.183673
2	no RH	0.285	0.228
2	no RH	0.28	0.195122
2	no RH	0.23	0.164286
2	no RH	0.275	0.191638
2	no RH	0.275	0.190311
2	no RH	0.29	0.184713
2	no RH	0.57	0.323864
2	no RH	0.29	0.176292
2	no RH	0.245	0.17193
2	no RH	0.27	0.192171
2	no RH	0.295	0.195364
2	no RH	0.31	0.216028
2	no RH	0.36	0.236066
2	no RH	0.34	0.232082
2	no RH	0.325	0.221843
2	no RH	0.26	0.168831
2	no RH	0.27	0.204545
2	no RH	0.3	0.2
2	no RH	0.28	0.18543
2	no RH	0.36	0.188976
2	no RH	0.475	0.303514
2	no RH	0.305	0.198052
2	no RH	0.35	0.219436
2	no RH	0.415	0.243402
2	no RH	0.33	0.214984
2	no RH	0.315	0.211409
2	no RH	0.295	0.203448
2	no RH	0.255	0.172881
2	no RH	0.31	0.190184
2	no RH	0.285	0.208791
2	no RH	0.295	0.192182
2	no RH	0.375	0.208914
2	no RH	0.555	0.242358
2	no RH	0.49	0.259947
2	no RH	0.475	0.216895
2	no RH	0.455	0.27003
2	no RH	0.33	0.210863
2	no RH
2	no RH	0.24	0.168421
2	no RH	0.325	0.221088
2	no RH	0.23	0.167883
2	no RH	0.28	0.197183
2	no RH	0.26	0.171617
2	no RH	0.26	0.203922
2	no RH	0.245	0.183521
2	no RH	0.28	0.181818
2	no RH	0.24	0.191235
2	no RH	0.28	0.193772
2	no RH	0.265	0.180887
2	no RH	0.25	0.167785
2	no RH	0.28	0.189831
2	no RH	0.285	0.194539
2	no RH	0.26	0.17931
2	no RH	0.235	0.164336
2	no RH	0.215	0.153025
2	no RH	0.23	0.152318
2	no RH	0.215	0.173387
2	no RH	0.215	0.146259
2	no RH	0.23	0.168498
2	no RH	0.255	0.186131
2	no RH	0.245	0.179487
2	no RH	0.225	0.181452
2	no RH	0.245	0.179487
2	no RH	0.24	0.177122
2	no RH	0.23	0.168498
2	no RH	0.265	0.179661
2	no RH	0.555	0.289817
2	no RH	0.315	0.225
2	no RH	0.285	0.204301
2	no RH	0.295	0.217712
2	no RH	0.225	0.15625
2	no RH	0.23	0.186992
2	no RH	0.245	0.165541
2	no RH	0.27	0.194946
2	no RH	0.235	0.168459
2	no RH	0.27	0.211765
2	no RH	0.3	0.199336
2	no RH	0.245	0.196787
2	no RH	0.255	0.172881
2	no RH	0.23	0.184739
2	no RH
2	no RH	0.375	0.265018
2	no RH	0.345	0.230769
2	no RH	0.415	0.266881
2	no RH	0.355	0.232787
2	no RH	0.29	0.214022
2	no RH	0.295	0.207746
2	no RH	0.3	0.198675
2	no RH	0.345	0.22623
2	no RH	0.3	0.185759
2	no RH	0.305	0.225092
2	no RH	0.355	0.238255
2	no RH	0.265	0.189964
2	no RH	0.3	0.212014
2	no RH	0.315	0.207237
2	no RH	0.315	0.238636
2	no RH	0.285	0.213483
2	no RH	0.285	0.197917
2	no RH	0.27	0.207692
2	no RH	0.26	0.210526
2	no RH	0.245	0.216814
2	no RH	0.235	0.181467
2	no RH	0.23	0.194093
2	no RH	0.24	0.2
2	no RH	0.24	0.194332
2	no RH	0.265	0.219917
2	no RH	0.225	0.169811
2	no RH	0.29	0.211679
2	no RH	0.305	0.225092
2	no RH	0.25	0.183824
2	no RH	0.3	0.205479
2	no RH	0.28	0.228571
2	no RH	0.25	0.18315
2	no RH	0.295	0.221805
2	no RH	0.2	0.14652
2	no RH	0.23	0.192469
2	no RH	0.295	0.212996
2	no RH	0.305	0.219424
2	no RH	0.265	0.194139
2	no RH	0.315	0.227437
2	no RH	0.33	0.216393
2	no RH	0.285	0.224409
2	no RH	0.255	0.180851
2	no RH	0.3	0.210526
2	no RH	0.34	0.230508
2	no RH	0.29	0.188312
2	no RH
2	no RH	0.265	0.192727
2	no RH	0.12	0.120603
2	no RH	0.195	0.155378
2	no RH	0.245	0.171329
2	no RH	0.195	0.164557
2	no RH	0.235	0.169065
2	no RH	0.31	0.227106
2	no RH	0.285	0.186275
2	no RH	0.405	0.253918
2	no RH	0.375	0.232198
2	no RH	0.39	0.239264
2	no RH	0.385	0.211538
2	no RH	0.34	0.206061
2	no RH	0.37	0.23871
2	no RH	0.305	0.199346
2	no RH	0.35	0.233333
2	no RH	0.32	0.235294
2	no RH	0.325	0.202492
2	no RH	0.375	0.258621
2	no RH	0.47	0.236776
2	no RH	0.305	0.2
2	no RH	0.33	0.209524
2	no RH	0.27	0.206107
2	no RH	0.27	0.226891
2	no RH	0.22	0.184874
2	no RH	0.265	0.227468
2	no RH	0.27	0.203008
2	no RH	0.28	0.205128
2	no RH	0.29	0.19661
2	no RH	0.285	0.228916
2	no RH	0.225	0.159574
2	no RH	0.315	0.225806
2	no RH	0.265	0.187943
2	no RH	0.3	0.194805
2	no RH	0.35	0.234114
2	no RH	0.26	0.191882
2	no RH	0.295	0.21223
2	no RH
2	no RH
2	no RH	0.27	0.188811
2	no RH	0.315	0.212121
2	no RH	0.3	0.245902
2	no RH	0.235	0.166078
2	no RH	0.275	0.221774
2	no RH	0.245	0.178832
2	no RH	0.27	0.184932
2	no RH	0.26	0.197719
2	no RH	0.23	0.181818
2	no RH	0.28	0.202166
2	no RH	0.245	0.166102
2	no RH	0.245	0.197581
2	no RH	0.21	0.164062
2	no RH	0.28	0.223108
2	no RH	0.26	0.19697
2	no RH	0.14	0.125
2	no RH	0.145	0.124464
2	no RH	0.16	0.140969
2	no RH	0.225	0.193966
2	no RH	0.21	0.155556
2	no RH	0.235	0.198312
2	no RH	0.17	0.139918
2	no RH	0.245	0.205882
2	no RH	0.155	0.134783
2	no RH	0.215	0.173387
2	no RH	0.17	0.141667
2	no RH	0.225	0.174419
2	no RH	0.27	0.23176
2	no RH	0.285	0.211896
2	no RH	0.29	0.200692
2	no RH	0.29	0.228346
2	no RH	0.265	0.212851
2	no RH	0.205	0.168724
2	no RH	0.185	0.148594
2	no RH	0.2	0.163265
2	no RH	0.19	0.160338
2	no RH
2	no RH	0.24	0.158416
2	no RH	0.51	0.300885
2	no RH	0.19	0.144487
2	no RH	0.37	0.239482
2	no RH	0.35	0.215385
2	no RH	0.295	0.233202
2	no RH	0.4	0.254777
2	no RH	0.295	0.18323
2	no RH	0.335	0.200599
2	no RH	0.495	0.267568
2	no RH	0.505	0.251244
2	no RH	0.445	0.238606
2	no RH	0.565	0.297368
2	no RH	0.39	0.230088
2	no RH	0.435	0.266871
2	no RH	0.5	0.255102
2	no RH	0.575	0.228628
2	no RH	0.34	0.217252
2	no RH	0.41	0.241888
2	no RH	0.465	0.264205
2	no RH	0.435	0.247159
2	no RH	0.365	0.197297
2	no RH	0.59	0.311346
2	no RH	0.36	0.180451
2	no RH	0.57	0.320225
2	no RH	0.485	0.268698
2	no RH	0.405	0.246201
2	no RH	0.4	0.253165
2	no RH	0.395	0.238671
2	no RH	0.43	0.247839
2	no RH	0.405	0.248466
2	no RH	0.29	0.197952
2	no RH	0.34	0.235294
2	no RH	0.275	0.186441
2	no RH	0.31	0.203947
2	no RH	0.32	0.20712
2	no RH	0.385	0.247588
2	no RH	0.39	0.248408
2	no RH	0.37	0.23871
2	no RH	0.34	0.223684
2	no RH	0.345	0.230769
2	no RH	0.34	0.228956
2	no RH	0.32	0.21843
2	no RH	0.34	0.227425
2	no RH	0.34	0.21519
2	no RH
3	no LF	0.3	0.164384
3	no LF	0.27	0.105469
3	no LF	0.29	0.165992
3	no LF	0.265	0.163498
3	no LF	0.175	0.162393
3	no LF	0.28	0.155556
3	no LF	0.175	0.146245
3	no LF	0.23	0.139623
3	no LF	0.155	0.138075
3	no LF	0.16	0.158798
3	no LF	0.145	0.150215
3	no LF	0.14	0.164384
3	no LF	0.12	0.141509
3	no LF	0.105	0.129187
3	no LF	0.11	0.122066
3	no LF	0.125	0.12093
3	no LF	0.13	0.14486
3	no LF	0.12	0.087156
3	no LF	0.12	0.135514
3	no LF	0.115	0.114679
3	no LF	0.125	0.0567686
3	no LF	0.135	0.135747
3	no LF	0.125	0.12963
3	no LF	0.15	0.155556
3	no LF	0.13	0.113122
3	no LF	0.125	0.126168
3	no LF	0.12	0.125604
3	no LF	0.11	0.0921659
3	no LF	0.14	0.0983607
3	no LF	0.2	0.117409
3	no LF	0.15	0.104072
3	no LF	0.14	0.0669643
3	no LF	0.14	0.130435
3	no LF	0.14	0.116883
3	no LF	0.155	0.143498
3	no LF	0.395	0.229437
3	no LF	0.18	0.201521
3	no LF	0.14	0.145749
3	no LF	0.165	0.153191
3	no LF	0.14	0.150442
3	no LF	0.145	0.150198
3	no LF	0.195	0.182836
3	no LF
3	no LF	0.175	0.135246
3	no LF	0.27	0.169884
3	no LF	0.27	0.136531
3	no LF	0.16	0.148
3	no LF	0.13	0.165138
3	no LF	0.245	0.133588
3	no LF	0.165	0.149606
3	no LF	0.175	0.184426
3	no LF	0.365	0.208571
3	no LF	0.17	0.184874
3	no LF	0.245	0.123239
3	no LF	0.33	0.149826
3	no LF	0.305	0.170213
3	no LF	0.205	0.174905
3	no LF	0.265	0.190299
3	no LF	0.15	0.131579
3	no LF	0.125	0.145455
3	no LF	0.13	0.0944206
3	no LF	0.16	0.14
3	no LF	0.155	0.162264
3	no LF	0.31	0.150888
3	no LF		0.257757
3	no LF	0.535	0.161692
3	no LF	0.29	0.155039
3	no LF	0.285	0.215625
3	no LF	0.295	0.176895
3	no LF	0.145	0.150215
3	no LF	0.14	0.168103
3	no LF	0.15	0.144068
3	no LF	0.165	0.159184
3	no LF	0.16	0.132
3	no LF	0.175	0.181818
3	no LF
3	no LF	0.245	0.172131
3	no LF	0.125	0.0952381
3	no LF	0.13	0.153846
3	no LF	0.115	0.123223
3	no LF	0.115	0.135747
3	no LF	0.125	0.146789
3	no LF	0.13	0.114679
3	no LF	0.125	0.116822
3	no LF	0.115	0.118483
3	no LF	0.105	0.113861
3	no LF	0.095	0.100503
3	no LF	0.105	0.104762
3	no LF	0.115	0.140845
3	no LF	0.125	0.136986
3	no LF	0.125	0.108597
3	no LF	0.13	0.115207
3	no LF	0.125	0.119048
3	no LF	0.12	0.112745
3	no LF	0.11	0.101942
3	no LF	0.105	0.102941
3	no LF	0.105	0.102041
3	no LF	0.095	0.0964467
3	no LF	0.105	0.101942
3	no LF	0.12	0.106977
3	no LF	0.13	0.12844
3	no LF	0.135	0.118421
3	no LF	0.15	0.145228
3	no LF	0.145	0.148148
3	no LF	0.12	0.122642
3	no LF	0.12	0.140845
3	no LF	0.12	0.111628
3	no LF	0.12	0.146919
3	no LF	0.12	0.113744
3	no LF	0.12	0.0841121
3	no LF	0.12	0.121622
3	no LF	0.14	0.126087
3	no LF
3	no LF	0.37	0.244898
3	no LF	0.285	0.141732
3	no LF	0.27	0.160494
3	no LF	0.26	0.146617
3	no LF	0.205	0.295031
3	no LF	0.215	0.174672
3	no LF	0.23	0.121339
3	no LF	0.125	0.123853
3	no LF	0.125	0.150235
3	no LF	0.125	0.12037
3	no LF	0.135	0.121849
3	no LF	0.175	0.0894309
3	no LF	0.135	0.0968992
3	no LF	0.195	0.0964912
3	no LF	0.245	0.259124
3	no LF		0.127208
3	no LF	0.2	0.184502
3	no LF	0.23	0.234043
3	no LF	0.14	0.149485
3	no LF	0.07	0.0691489
3	no LF	0.095	0.112676
3	no LF	0.12	0.132479
3	no LF	0.175	0.185185
3	no LF	0.17	0.140078
3	no LF	0.25	0.219653
3	no LF	0.295	0.141304
3	no LF
3	no RF	0.4	0.164384
3	no RF	0.3	0.105469
3	no RF	0.28	0.165992
3	no RF	0.285	0.163498
3	no RF	0.295	0.162393
3	no RF	0.205	0.155556
3	no RF	0.3	0.146245
3	no RF	0.295	0.139623
3	no RF	0.25	0.138075
3	no RF	0.15	0.158798
3	no RF	0.155	0.150215
3	no RF	0.15	0.164384
3	no RF	0.135	0.141509
3	no RF	0.125	0.129187
3	no RF	0.135	0.122066
3	no RF	0.14	0.12093
3	no RF	0.14	0.14486
3	no RF	0.145	0.087156
3	no RF	0.14	0.135514
3	no RF	0.15	0.114679
3	no RF	0.155	0.0567686
3	no RF	0.16	0.135747
3	no RF	0.15	0.12963
3	no RF	0.155	0.155556
3	no RF	0.14	0.113122
3	no RF	0.13	0.126168
3	no RF	0.125	0.125604
3	no RF	0.135	0.0921659
3	no RF	0.165	0.0983607
3	no RF	0.185	0.117409
3	no RF	0.15	0.104072
3	no RF	0.15	0.0669643
3	no RF	0.16	0.130435
3	no RF	0.165	0.116883
3	no RF	0.175	0.143498
3	no RF	0.405	0.229437
3	no RF	0.325	0.201521
3	no RF	0.175	0.145749
3	no RF	0.15	0.153191
3	no RF	0.16	0.150442
3	no RF	0.195	0.150198
3	no RF	0.185	0.182836
3	no RF
3	no RF	0.305	0.135246
3	no RF	0.315	0.169884
3	no RF	0.28	0.136531
3	no RF	0.155	0.148
3	no RF	0.265	0.165138
3	no RF	0.185	0.133588
3	no RF	0.28	0.149606
3	no RF	0.305	0.184426
3	no RF	0.395	0.208571
3	no RF	0.295	0.184874
3	no RF	0.215	0.123239
3	no RF	0.235	0.149826
3	no RF	0.31	0.170213
3	no RF	0.325	0.174905
3	no RF	0.185	0.190299
3	no RF	0.15	0.131579
3	no RF	0.14	0.145455
3	no RF	0.15	0.0944206
3	no RF	0.175	0.14
3	no RF	0.185	0.162264
3	no RF	0.27	0.150888
3	no RF	0.33	0.257757
3	no RF	0.37	0.161692
3	no RF	0.145	0.155039
3	no RF	0.37	0.215625
3	no RF	0.21	0.176895
3	no RF	0.15	0.150215
3	no RF	0.16	0.168103
3	no RF	0.16	0.144068
3	no RF	0.17	0.159184
3	no RF	0.175	0.132
3	no RF	0.18	0.181818
3	no RF
3	no RF	0.18	0.172131
3	no RF	0.15	0.0952381
3	no RF	0.12	0.153846
3	no RF	0.135	0.123223
3	no RF	0.14	0.135747
3	no RF	0.14	0.146789
3	no RF	0.135	0.114679
3	no RF	0.135	0.116822
3	no RF	0.13	0.118483
3	no RF	0.12	0.113861
3	no RF	0.105	0.100503
3	no RF	0.12	0.104762
3	no RF	0.14	0.140845
3	no RF	0.14	0.136986
3	no RF	0.145	0.108597
3	no RF	0.14	0.115207
3	no RF	0.135	0.119048
3	no RF	0.125	0.112745
3	no RF	0.12	0.101942
3	no RF	0.125	0.102941
3	no RF	0.12	0.102041
3	no RF	0.11	0.0964467
3	no RF	0.125	0.101942
3	no RF	0.135	0.106977
3	no RF	0.15	0.12844
3	no RF	0.15	0.118421
3	no RF	0.175	0.145228
3	no RF	0.14	0.148148
3	no RF	0.14	0.122642
3	no RF	0.13	0.140845
3	no RF	0.14	0.111628
3	no RF	0.13	0.146919
3	no RF	0.13	0.113744
3	no RF	0.14	0.0841121
3	no RF	0.135	0.121622
3	no RF	0.165	0.126087
3	no RF
3	no RF	0.245	0.244898
3	no RF	0.17	0.141732
3	no RF	0.26	0.160494
3	no RF	0.26	0.146617
3	no RF	0.365	0.295031
3	no RF	0.135	0.174672
3	no RF	0.15	0.121339
3	no RF	0.14	0.123853
3	no RF	0.14	0.150235
3	no RF	0.125	0.12037
3	no RF	0.135	0.121849
3	no RF	0.17	0.0894309
3	no RF	0.195	0.0968992
3	no RF	0.32	0.0964912
3	no RF	0.305	0.259124
3	no RF	0.285	0.127208
3	no RF	0.225	0.184502
3	no RF	0.23	0.234043
3	no RF	0.1	0.149485
3	no RF	0.19	0.0691489
3	no RF	0.125	0.112676
3	no RF	0.15	0.132479
3	no RF	0.21	0.185185
3	no RF	0.175	0.140078
3	no RF	0.46	0.219653
3	no RF	0.285	0.141304
3	no RF
3	no LH	0.28	0.164384
3	no LH	0.255	0.105469
3	no LH	0.205	0.165992
3	no LH	0.205	0.163498
3	no LH	0.24	0.162393
3	no LH	0.195	0.155556
3	no LH	0.3	0.146245
3	no LH	0.185	0.139623
3	no LH	0.19	0.138075
3	no LH	0.2	0.158798
3	no LH	0.2	0.150215
3	no LH	0.165	0.164384
3	no LH	0.165	0.141509
3	no LH	0.135	0.129187
3	no LH	0.175	0.122066
3	no LH	0.18	0.12093
3	no LH	0.165	0.14486
3	no LH	0.17	0.087156
3	no LH	0.14	0.135514
3	no LH	0.175	0.114679
3	no LH	0.165	0.0567686
3	no LH	0.15	0.135747
3	no LH	0.155	0.12963
3	no LH	0.2	0.155556
3	no LH	0.18	0.113122
3	no LH	0.17	0.126168
3	no LH	0.135	0.125604
3	no LH	0.19	0.0921659
3	no LH	0.21	0.0983607
3	no LH	0.2	0.117409
3	no LH	0.175	0.104072
3	no LH	0.17	0.0669643
3	no LH	0.165	0.130435
3	no LH	0.225	0.116883
3	no LH	0.24	0.143498
3	no LH	0.35	0.229437
3	no LH	0.21	0.201521
3	no LH	0.24	0.145749
3	no LH	0.17	0.153191
3	no LH	0.175	0.150442
3	no LH	0.205	0.150198
3	no LH	0.305	0.182836
3	no LH
3	no LH	0.21	0.135246
3	no LH	0.215	0.169884
3	no LH	0.235	0.136531
3	no LH	0.2	0.148
3	no LH	0.21	0.165138
3	no LH	0.23	0.133588
3	no LH	0.215	0.149606
3	no LH	0.245	0.184426
3	no LH	0.27	0.208571
3	no LH	0.21	0.184874
3	no LH	0.335	0.123239
3	no LH	0.25	0.149826
3	no LH	0.215	0.170213
3	no LH	0.255	0.174905
3	no LH	0.21	0.190299
3	no LH	0.185	0.131579
3	no LH	0.18	0.145455
3	no LH	0.2	0.0944206
3	no LH	0.22	0.14
3	no LH	0.365	0.162264
3	no LH	0.565	0.150888
3	no LH	0.435	0.257757
3	no LH	0.28	0.161692
3	no LH	0.265	0.155039
3	no LH	0.34	0.215625
3	no LH	0.23	0.176895
3	no LH	0.205	0.150215
3	no LH	0.205	0.168103
3	no LH	0.215	0.144068
3	no LH	0.215	0.159184
3	no LH	0.225	0.132
3	no LH	0.215	0.181818
3	no LH
3	no LH	0.15	0.172131
3	no LH	0.2	0.0952381
3	no LH	0.165	0.153846
3	no LH	0.16	0.123223
3	no LH	0.165	0.135747
3	no LH	0.17	0.146789
3	no LH	0.175	0.114679
3	no LH	0.14	0.116822
3	no LH	0.15	0.118483
3	no LH	0.14	0.113861
3	no LH	0.12	0.100503
3	no LH	0.14	0.104762
3	no LH	0.155	0.140845
3	no LH	0.15	0.136986
3	no LH	0.175	0.108597
3	no LH	0.165	0.115207
3	no LH	0.13	0.119048
3	no LH	0.135	0.112745
3	no LH	0.12	0.101942
3	no LH	0.16	0.102941
3	no LH	0.11	0.102041
3	no LH	0.145	0.0964467
3	no LH	0.155	0.101942
3	no LH	0.135	0.106977
3	no LH	0.175	0.12844
3	no LH	0.18	0.118421
3	no LH	0.165	0.145228
3	no LH	0.17	0.148148
3	no LH	0.135	0.122642
3	no LH	0.15	0.140845
3	no LH	0.115	0.111628
3	no LH	0.12	0.146919
3	no LH	0.125	0.113744
3	no LH	0.16	0.0841121
3	no LH	0.195	0.121622
3	no LH	0.2	0.126087
3	no LH
3	no LH	0.255	0.244898
3	no LH	0.235	0.141732
3	no LH	0.205	0.160494
3	no LH	0.225	0.146617
3	no LH	0.235	0.295031
3	no LH	0.195	0.174672
3	no LH	0.205	0.121339
3	no LH	0.175	0.123853
3	no LH	0.175	0.150235
3	no LH	0.16	0.12037
3	no LH	0.25	0.121849
3	no LH	0.2	0.0894309
3	no LH	0.275	0.0968992
3	no LH	0.515	0.0964912
3	no LH	0.195	0.259124
3	no LH	0.275	0.127208
3	no LH	0.27	0.184502
3	no LH	0.215	0.234043
3	no LH	0.085	0.149485
3	no LH	0.15	0.0691489
3	no LH	0.175	0.112676
3	no LH	0.18	0.132479
3	no LH	0.21	0.185185
3	no LH	0.21	0.140078
3	no LH	0.37	0.219653
3	no LH	0.345	0.141304
3	no LH
3	no RH	0.24	0.164384
3	no RH	0.135	0.105469
3	no RH	0.205	0.165992
3	no RH	0.215	0.163498
3	no RH	0.19	0.162393
3	no RH	0.21	0.155556
3	no RH	0.185	0.146245
3	no RH	0.185	0.139623
3	no RH	0.165	0.138075
3	no RH	0.185	0.158798
3	no RH	0.175	0.150215
3	no RH	0.18	0.164384
3	no RH	0.15	0.141509
3	no RH	0.135	0.129187
3	no RH	0.13	0.122066
3	no RH	0.13	0.12093
3	no RH	0.155	0.14486
3	no RH	0.095	0.087156
3	no RH	0.145	0.135514
[truncated: 11,813 more rows]

## Sheet: speed normalized bipedal
cow_nr	limb	Var3
1	LF-RH	0.0742188
1	LF-RH	0.10728
1	LF-RH	0.0851064
1	LF-RH	0.107692
1	LF-RH	0.0902778
1	LF-RH	0.101562
1	LF-RH	0.0888889
1	LF-RH	0.108553
1	LF-RH	0.0934959
1	LF-RH	0.145833
1	LF-RH	0.155738
1	LF-RH	0.0714286
1	LF-RH	0.125
1	LF-RH	0.107407
1	LF-RH	0.0968858
1	LF-RH	0.142308
1	LF-RH	0.090604
1	LF-RH	0.0726644
1	LF-RH	0.0760456
1	LF-RH	0.0922509
1	LF-RH	0.0682594
1	LF-RH	0.0982456
1	LF-RH	0.126437
1	LF-RH	0.120172
1	LF-RH	0.113139
1	LF-RH	0.10219
1	LF-RH	0.137795
1	LF-RH	0.114391
1	LF-RH	0.09699
1	LF-RH
1	LF-RH	0.0424028
1	LF-RH	0.0716724
1	LF-RH	0.0948617
1	LF-RH	0.0730769
1	LF-RH	0.129707
1	LF-RH	0.11157
1	LF-RH	0.097561
1	LF-RH	0.110619
1	LF-RH	0.117391
1	LF-RH	0.116466
1	LF-RH	0.0882353
1	LF-RH	0.0935484
1	LF-RH	0.0820669
1	LF-RH	0.0396341
1	LF-RH	0.0323625
1	LF-RH	0.0372881
1	LF-RH	0.126354
1	LF-RH	0.122378
1	LF-RH	0.117021
1	LF-RH	0.118519
1	LF-RH	0.114068
1	LF-RH	0.113553
1	LF-RH	0.105263
1	LF-RH	0.0537313
1	LF-RH
1	LF-RH
1	LF-RH	0.110092
1	LF-RH	0.146018
1	LF-RH	0.119149
1	LF-RH	0.134783
1	LF-RH	0.112069
1	LF-RH	0.116667
1	LF-RH	0.109756
1	LF-RH	0.111111
1	LF-RH	0.120833
1	LF-RH	0.121849
1	LF-RH	0.111111
1	LF-RH	0.114625
1	LF-RH	0.101215
1	LF-RH	0.101266
1	LF-RH	0.0588235
1	LF-RH	0.105505
1	LF-RH	0.0826772
1	LF-RH	0.103175
1	LF-RH	0.12069
1	LF-RH	0.104603
1	LF-RH	0.11336
1	LF-RH	0.119522
1	LF-RH	0.108434
1	LF-RH	0.122449
1	LF-RH	0.127572
1	LF-RH	0.109848
1	LF-RH	0.0589681
1	LF-RH	0.0555556
1	LF-RH	0.0699301
1	LF-RH	0.0880503
1	LF-RH	0.0623053
1	LF-RH	0.128
1	LF-RH	0.0955414
1	LF-RH	0.105839
1	LF-RH	0.117647
1	LF-RH	0.0792453
1	LF-RH	0.107807
1	LF-RH	0.115079
1	LF-RH	0.109434
1	LF-RH	0.127753
1	LF-RH
1	RF-LH	0.0117188
1	RF-LH	0.0842912
1	RF-LH	0.0602837
1	RF-LH	0.0653846
1	RF-LH	0.0868056
1	RF-LH	0.105469
1	RF-LH	0.118519
1	RF-LH	0.108553
1	RF-LH	0.105691
1	RF-LH	0.129167
1	RF-LH	0.122951
1	RF-LH	0.119048
1	RF-LH	0.125
1	RF-LH	0.137037
1	RF-LH	0.100346
1	RF-LH	0.107692
1	RF-LH	0.127517
1	RF-LH	0.141869
1	RF-LH	0.13308
1	RF-LH	0.129151
1	RF-LH	0.143345
1	RF-LH	0.0877193
1	RF-LH	0.0689655
1	RF-LH	0.141631
1	RF-LH	0.127737
1	RF-LH	0.124088
1	RF-LH	0.141732
1	RF-LH	0.129151
1	RF-LH	0.117057
1	RF-LH
1	RF-LH	0.024735
1	RF-LH	0.0750853
1	RF-LH	0.0869565
1	RF-LH	0.0730769
1	RF-LH	0.108787
1	RF-LH	0.0991736
1	RF-LH	0.0772358
1	RF-LH	0.079646
1	RF-LH	0.0869565
1	RF-LH	0.11245
1	RF-LH	0.0588235
1	RF-LH	0.0935484
1	RF-LH	0.0972644
1	RF-LH	0.0457317
1	RF-LH	0.012945
1	RF-LH	0.0508475
1	RF-LH	0.0613718
1	RF-LH	0.111888
1	RF-LH	0.131206
1	RF-LH	0.133333
1	RF-LH	0.140684
1	RF-LH	0.14652
1	RF-LH	0.119298
1	RF-LH	0.0656716
1	RF-LH
1	RF-LH
1	RF-LH	0.0183486
1	RF-LH	0.119469
1	RF-LH	0.12766
1	RF-LH	0.143478
1	RF-LH	0.155172
1	RF-LH	0.0958333
1	RF-LH	0.105691
1	RF-LH	0.142857
1	RF-LH	0.141667
1	RF-LH	0.092437
1	RF-LH	0.115226
1	RF-LH	0.0988142
1	RF-LH	0.157895
1	RF-LH	0.118143
1	RF-LH	0.0622837
1	RF-LH	0.0229358
1	RF-LH	0.106299
1	RF-LH	0.115079
1	RF-LH	0.103448
1	RF-LH	0.0669456
1	RF-LH	0.117409
1	RF-LH	0.0916335
1	RF-LH	0.108434
1	RF-LH	0.130612
1	RF-LH	0.127572
1	RF-LH	0.117424
1	RF-LH	0.0687961
1	RF-LH
1	RF-LH	0.0944056
1	RF-LH	0.113208
1	RF-LH	0.0809969
1	RF-LH	0.096
1	RF-LH	0.10828
1	RF-LH	0.105839
1	RF-LH	0.129412
1	RF-LH	0.0830189
1	RF-LH	0.115242
1	RF-LH	0.103175
1	RF-LH	0.0716981
1	RF-LH	0.127753
1	RF-LH
1	RF-RH	0.09375
1	RF-RH	0.0306513
1	RF-RH	0.0921986
1	RF-RH	0.0346154
1	RF-RH	0.0972222
1	RF-RH	0.09375
1	RF-RH	0.103704
1	RF-RH	0.0756579
1	RF-RH	0.097561
1	RF-RH	0.1
1	RF-RH	0.0409836
1	RF-RH	0.105442
1	RF-RH	0.112903
1	RF-RH	0.0222222
1	RF-RH	0.0865052
1	RF-RH	0.0230769
1	RF-RH	0.0805369
1	RF-RH	0.0588235
1	RF-RH	0.0418251
1	RF-RH	0.0405904
1	RF-RH	0.0307167
1	RF-RH	0.0947368
1	RF-RH	0.0881226
1	RF-RH	0.0300429
1	RF-RH	0.178832
1	RF-RH	0.116788
1	RF-RH	0.106299
1	RF-RH	0.136531
1	RF-RH
1	RF-RH
1	RF-RH	0.0989399
1	RF-RH	0.0307167
1	RF-RH	0.0316206
1	RF-RH	0.0846154
1	RF-RH	0.0334728
1	RF-RH	0.0289256
1	RF-RH	0.0772358
1	RF-RH	0.079646
1	RF-RH	0.0304348
1	RF-RH	0.0883534
1	RF-RH	0.0147059
1	RF-RH	0.1
1	RF-RH	0.0729483
1	RF-RH	0.0914634
1	RF-RH	0.0938511
1	RF-RH	0.0847458
1	RF-RH	0.0938628
1	RF-RH	0.0839161
1	RF-RH	0.0815603
1	RF-RH	0.0888889
1	RF-RH	0.095057
1	RF-RH	0.128205
1	RF-RH	0.133333
1	RF-RH	0.0955224
1	RF-RH
1	RF-RH	0.123506
1	RF-RH	0.123853
1	RF-RH	0.119469
1	RF-RH	0.119149
1	RF-RH	0.108696
1	RF-RH	0.103448
1	RF-RH	0.1375
1	RF-RH	0.101626
1	RF-RH	0.115079
1	RF-RH	0.104167
1	RF-RH	0.109244
1	RF-RH	0.106996
1	RF-RH	0.106719
1	RF-RH	0.11336
1	RF-RH	0.0590717
1	RF-RH	0.117647
1	RF-RH	0.0366972
1	RF-RH	0.102362
1	RF-RH	0.107143
1	RF-RH	0.0991379
1	RF-RH	0.138075
1	RF-RH	0.097166
1	RF-RH	0.115538
1	RF-RH	0.15261
1	RF-RH	0.114286
1	RF-RH	0.139918
1	RF-RH	0.117424
1	RF-RH	0.0515971
1	RF-RH	0.0444444
1	RF-RH	0.101399
1	RF-RH	0.110063
1	RF-RH	0.0996885
1	RF-RH	0.032
1	RF-RH	0.101911
1	RF-RH	0.0948905
1	RF-RH	0.105882
1	RF-RH	0.113208
1	RF-RH	0.107807
1	RF-RH	0.0357143
1	RF-RH	0.101887
1	RF-RH	0.110132
1	RF-RH
1	LF-LH	0.0859375
1	LF-LH	0.1341
1	LF-LH	0.117021
1	LF-LH	0.0269231
1	LF-LH	0.111111
1	LF-LH	0.136719
1	LF-LH	0.12963
1	LF-LH	0.111842
1	LF-LH	0.134146
1	LF-LH	0.125
1	LF-LH	0.127049
1	LF-LH	0.180272
1	LF-LH	0.104839
1	LF-LH	0.0333333
1	LF-LH	0.114187
1	LF-LH	0.157692
1	LF-LH	0.107383
1	LF-LH	0.0415225
1	LF-LH	0.0342205
1	LF-LH	0.0147601
1	LF-LH	0.119454
1	LF-LH	0.0245614
1	LF-LH	0.0957854
1	LF-LH	0.120172
1	LF-LH	0.0839416
1	LF-LH	0.0218978
1	LF-LH	0.0866142
1	LF-LH	0.099631
1	LF-LH	0.0936455
1	LF-LH
1	LF-LH	0.0141343
1	LF-LH	0.0375427
1	LF-LH	0.0711462
1	LF-LH	0.0692308
1	LF-LH	0.0878661
1	LF-LH	0.0867769
1	LF-LH	0.0243902
1	LF-LH	0.0265487
1	LF-LH	0.0347826
1	LF-LH	0.0240964
1	LF-LH	0.0220588
1	LF-LH	0.0225806
1	LF-LH	0.0243161
1	LF-LH	0.0426829
1	LF-LH	0.0453074
1	LF-LH	0.135593
1	LF-LH	0.0938628
1	LF-LH	0.0979021
1	LF-LH	0.0390071
1	LF-LH	0.0296296
1	LF-LH	0.125475
1	LF-LH	0.106227
1	LF-LH	0.101754
1	LF-LH	0.101493
1	LF-LH
1	LF-LH	0.0677291
1	LF-LH	0.105505
1	LF-LH	0.128319
1	LF-LH	0.110638
1	LF-LH	0.121739
1	LF-LH	0.12931
1	LF-LH	0.108333
1	LF-LH	0.130081
1	LF-LH	0.119048
1	LF-LH	0.108333
1	LF-LH	0.117647
1	LF-LH	0.106996
1	LF-LH	0.106719
1	LF-LH	0.0283401
1	LF-LH	0.021097
1	LF-LH	0.121107
1	LF-LH	0.110092
1	LF-LH	0.11811
1	LF-LH	0.107143
1	LF-LH	0.0862069
1	LF-LH	0.104603
1	LF-LH	0.097166
1	LF-LH	0.0996016
1	LF-LH	0.108434
1	LF-LH	0.114286
1	LF-LH	0.111111
1	LF-LH	0.117424
1	LF-LH	0.113022
1	LF-LH	0.151852
1	LF-LH	0.122378
1	LF-LH	0.141509
1	LF-LH	0.109034
1	LF-LH	0.104
1	LF-LH	0.089172
1	LF-LH	0.113139
1	LF-LH	0.113725
1	LF-LH	0.120755
1	LF-LH	0.107807
1	LF-LH	0.123016
1	LF-LH	0.10566
1	LF-LH	0.0792952
1	LF-LH
2	LF-RH	0.110236
2	LF-RH	0.137324
2	LF-RH	0.103896
2	LF-RH	0.0984127
2	LF-RH	0.0894569
2	LF-RH	0.112853
2	LF-RH	0.0964286
2	LF-RH	0.0853242
2	LF-RH	0.12069
2	LF-RH	0.10299
2	LF-RH	0.0888158
2	LF-RH	0.100324
2	LF-RH	0.0897833
2	LF-RH	0.0935484
2	LF-RH	0.0735786
2	LF-RH	0.0965517
2	LF-RH	0.107744
2	LF-RH	0.0766551
2	LF-RH	0.115254
2	LF-RH	0.105263
2	LF-RH	0.0972222
2	LF-RH	0.106762
2	LF-RH	0.1
2	LF-RH	0.118321
2	LF-RH	0.103806
2	LF-RH	0.118033
2	LF-RH	0.0766773
2	LF-RH	0.0880503
2	LF-RH	0.117216
2	LF-RH	0.111498
2	LF-RH	0.0666667
2	LF-RH	0.0811808
2	LF-RH	0.0909091
2	LF-RH	0.0744337
2	LF-RH	0.0836502
2	LF-RH	0.101911
2	LF-RH	0.118519
2	LF-RH	0.0942761
2	LF-RH	0.0749186
2	LF-RH	0.122302
2	LF-RH
2	LF-RH	0.0903427
2	LF-RH	0.086262
2	LF-RH	0.0641399
2	LF-RH	0.104
2	LF-RH	0.10453
2	LF-RH	0.107143
2	LF-RH	0.101045
2	LF-RH	0.103806
2	LF-RH	0.117834
2	LF-RH	0.00852273
2	LF-RH	0.100304
2	LF-RH	0.0947368
2	LF-RH	0.0818505
2	LF-RH	0.102649
2	LF-RH	0.0662021
2	LF-RH	0.0721311
2	LF-RH	0.0887372
2	LF-RH	0.109215
2	LF-RH	0.103896
2	LF-RH	0.128788
2	LF-RH	0.12
2	LF-RH	0.10596
2	LF-RH	0.0734908
2	LF-RH	0.0511182
2	LF-RH	0.0519481
2	LF-RH	0.0940439
2	LF-RH	0.0821114
2	LF-RH	0.0553746
2	LF-RH	0.100671
2	LF-RH	0.103448
2	LF-RH	0.125424
2	LF-RH	0.0981595
2	LF-RH	0.131868
2	LF-RH	0.107492
2	LF-RH	0.091922
2	LF-RH	0.0611354
2	LF-RH	0.0875332
2	LF-RH
2	LF-RH	0.0474777
2	LF-RH	0.0766773
2	LF-RH
2	LF-RH	0.0140351
2	LF-RH	0.122449
2	LF-RH	0.116788
2	LF-RH	0.112676
2	LF-RH	0.10231
2	LF-RH	0.152941
2	LF-RH	0.138577
2	LF-RH	0.100649
2	LF-RH	0.119522
2	LF-RH	0.117647
2	LF-RH	0.105802
2	LF-RH	0.110738
2	LF-RH	0.111864
2	LF-RH	0.116041
2	LF-RH	0.131034
2	LF-RH	0.125874
2	LF-RH	0.124555
2	LF-RH	0.13245
2	LF-RH	0.149194
2	LF-RH	0.119048
2	LF-RH	0.113553
2	LF-RH	0.135036
2	LF-RH	0.120879
2	LF-RH	0.149194
2	LF-RH	0.131868
2	LF-RH	0.129151
2	LF-RH	0.135531
2	LF-RH	0.0915254
2	LF-RH	0.0887728
2	LF-RH	0.0821429
2	LF-RH	0.0967742
2	LF-RH	0.132841
2	LF-RH	0.135417
2	LF-RH	0.142276
2	LF-RH	0.121622
2	LF-RH	0.119134
2	LF-RH	0.111111
2	LF-RH	0.137255
2	LF-RH	0.112957
2	LF-RH	0.0923695
2	LF-RH	0.125424
2	LF-RH	0.144578
2	LF-RH
2	LF-RH	0.0459364
2	LF-RH	0.100334
2	LF-RH	0.0900322
2	LF-RH	0.0983607
2	LF-RH	0.103321
2	LF-RH	0.119718
2	LF-RH	0.10596
2	LF-RH	0.0918033
2	LF-RH	0.102167
2	LF-RH	0.095941
2	LF-RH	0.0973154
2	LF-RH	0.121864
2	LF-RH	0.0848057
2	LF-RH	0.118421
2	LF-RH	0.113636
2	LF-RH	0.131086
2	LF-RH	0.138889
2	LF-RH	0.153846
2	LF-RH	0.133603
2	LF-RH	0.159292
2	LF-RH	0.146718
2	LF-RH	0.160338
2	LF-RH	0.158333
2	LF-RH	0.17004
2	LF-RH	0.165975
2	LF-RH	0.128302
2	LF-RH	0.10219
2	LF-RH	0.0922509
2	LF-RH	0.102941
2	LF-RH	0.126712
2	LF-RH	0.146939
2	LF-RH	0.0989011
2	LF-RH	0.135338
2	LF-RH	0.106227
2	LF-RH	0.179916
2	LF-RH	0.101083
2	LF-RH	0.111511
2	LF-RH	0.0952381
2	LF-RH	0.101083
2	LF-RH	0.095082
2	LF-RH	0.122047
2	LF-RH	0.131206
2	LF-RH	0.0947368
2	LF-RH	0.111864
2	LF-RH	0.11039
2	LF-RH
2	LF-RH	0.0763636
2	LF-RH	0.201005
2	LF-RH	0.187251
2	LF-RH	0.0944056
2	LF-RH	0.147679
2	LF-RH	0.118705
2	LF-RH	0.14652
2	LF-RH	0.101307
2	LF-RH	0.0971787
2	LF-RH	0.0897833
2	LF-RH	0.0858896
2	LF-RH	0.0769231
2	LF-RH	0.069697
2	LF-RH	0.0870968
2	LF-RH	0.0947712
2	LF-RH	0.0933333
2	LF-RH	0.0992647
2	LF-RH	0.0965732
2	LF-RH	0.110345
2	LF-RH
2	LF-RH	0.101639
2	LF-RH	0.0920635
2	LF-RH	0.122137
2	LF-RH	0.142857
2	LF-RH	0.201681
2	LF-RH	0.137339
2	LF-RH	0.135338
2	LF-RH	0.131868
2	LF-RH	0.108475
2	LF-RH	0.140562
2	LF-RH	0.12766
2	LF-RH	0.0824373
2	LF-RH	0.109929
2	LF-RH	0.107143
2	LF-RH	0.100334
2	LF-RH	0.129151
2	LF-RH	0.111511
2	LF-RH	0.109155
2	LF-RH
2	LF-RH	0.111888
2	LF-RH	0.10101
2	LF-RH	0.147541
2	LF-RH	0.130742
2	LF-RH	0.145161
2	LF-RH	0.142336
2	LF-RH	0.133562
2	LF-RH	0.144487
2	LF-RH	0.130435
2	LF-RH	0.126354
2	LF-RH	0.115254
2	LF-RH	0.149194
2	LF-RH	0.171875
2	LF-RH	0.131474
2	LF-RH	0.128788
2	LF-RH	0.191964
2	LF-RH	0.175966
2	LF-RH	0.185022
2	LF-RH	0.168103
2	LF-RH	0.148148
2	LF-RH	0.172996
2	LF-RH	0.17284
2	LF-RH	0.176471
2	LF-RH	0.178261
2	LF-RH	0.16129
2	LF-RH	0.15
2	LF-RH	0.135659
2	LF-RH	0.154506
2	LF-RH	0.111524
2	LF-RH	0.0934256
2	LF-RH	0.129921
2	LF-RH	0.15261
2	LF-RH	0.176955
2	LF-RH	0.156627
2	LF-RH	0.15102
2	LF-RH	0.168776
2	LF-RH
2	LF-RH	0.0759076
2	LF-RH	0.0265487
2	LF-RH	0.117871
2	LF-RH	0.0873786
2	LF-RH	0.0892308
2	LF-RH	0.126482
2	LF-RH	0.0859873
2	LF-RH	0.0962733
2	LF-RH	0.113772
2	LF-RH	0.0297297
2	LF-RH	0.0472637
2	LF-RH	0.0214477
2	LF-RH	0.0473684
2	LF-RH	0.0471976
2	LF-RH	0.0521472
2	LF-RH	0.00510204
2	LF-RH	0.083499
2	LF-RH	0.0926518
2	LF-RH	0.0737463
2	LF-RH	0.0340909
2	LF-RH	0.0738636
2	LF-RH	0.0567568
2	LF-RH
2	LF-RH	0.0075188
2	LF-RH	0.0758427
2	LF-RH	0.0277008
2	LF-RH	0.0668693
2	LF-RH	0.0917722
2	LF-RH	0.0694864
2	LF-RH	0.0634006
2	LF-RH	0.0766871
2	LF-RH	0.0887372
2	LF-RH	0.103806
2	LF-RH	0.0949153
2	LF-RH	0.0822368
2	LF-RH	0.0970874
2	LF-RH	0.0900322
2	LF-RH	0.0764331
2	LF-RH	0.0774194
2	LF-RH	0.0888158
2	LF-RH	0.0869565
2	LF-RH	0.10101
2	LF-RH	0.0989761
2	LF-RH	0.0702341
2	LF-RH	0.0727848
2	LF-RH
2	RF-LH	0.149606
2	RF-LH	0.0985915
2	RF-LH	0.12987
2	RF-LH	0.0920635
2	RF-LH	0.105431
2	RF-LH	0.109718
2	RF-LH	0.0571429
2	RF-LH	0.109215
2	RF-LH	0.113793
2	RF-LH	0.122924
2	RF-LH	0.111842
2	RF-LH	0.122977
2	RF-LH	0.102167
2	RF-LH	0.083871
2	RF-LH	0.113712
2	RF-LH	0.106897
2	RF-LH	0.0976431
2	RF-LH	0.0836237
2	RF-LH	0.0745763
2	RF-LH	0.0912281
2	RF-LH	0.0833333
2	RF-LH	0.113879
2	RF-LH	0.0833333
2	RF-LH	0.103053
2	RF-LH	0.103806
2	RF-LH	0.104918
2	RF-LH	0.0926518
2	RF-LH	0.0974843
2	RF-LH	0.0989011
2	RF-LH	0.101045
2	RF-LH	0.0888889
2	RF-LH	0.125461
2	RF-LH	0.129371
2	RF-LH	0.0517799
2	RF-LH	0.125475
2	RF-LH	0.105096
2	RF-LH	0.122222
2	RF-LH	0.121212
2	RF-LH	0.0846906
2	RF-LH	0.104317
2	RF-LH
2	RF-LH	0.109034
2	RF-LH	0.0990415
2	RF-LH	0.0932945
2	RF-LH	0.08
2	RF-LH	0.10453
2	RF-LH	0.103571
2	RF-LH	0.114983
2	RF-LH	0.114187
2	RF-LH	0.105096
2	RF-LH	0.0454545
2	RF-LH	0.0820669
2	RF-LH	0.126316
2	RF-LH	0.117438
2	RF-LH	0.0993377
2	RF-LH	0.0905923
2	RF-LH	0.0655738
2	RF-LH	0.0716724
2	RF-LH	0.0784983
2	RF-LH	0.12013
2	RF-LH	0.136364
2	RF-LH	0.1
2	RF-LH	0.10596
2	RF-LH	0.0866142
2	RF-LH	0.0191693
2	RF-LH	0.11039
2	RF-LH	0.0783699
2	RF-LH	0.0909091
2	RF-LH	0.0977199
2	RF-LH	0.0838926
2	RF-LH	0.0931034
2	RF-LH	0.108475
2	RF-LH	0.095092
2	RF-LH	0.113553
2	RF-LH	0.120521
2	RF-LH	0.0807799
2	RF-LH	0.0567686
2	RF-LH	0.071618
2	RF-LH	0.0707763
2	RF-LH	0.0326409
2	RF-LH	0.102236
2	RF-LH
2	RF-LH	0.0631579
2	RF-LH	0.108844
2	RF-LH	0.131387
2	RF-LH	0.109155
2	RF-LH	0.115512
2	RF-LH	0.133333
2	RF-LH	0.123596
2	RF-LH	0.0974026
2	RF-LH	0.135458
2	RF-LH	0.110727
2	RF-LH	0.122867
2	RF-LH	0.124161
2	RF-LH	0.0915254
2	RF-LH	0.112628
2	RF-LH	0.131034
2	RF-LH	0.125874
2	RF-LH	0.128114
2	RF-LH	0.129139
2	RF-LH	0.149194
2	RF-LH	0.115646
2	RF-LH	0.106227
2	RF-LH	0.120438
2	RF-LH	0.120879
2	RF-LH	0.133065
2	RF-LH	0.124542
2	RF-LH	0.132841
2	RF-LH	0.135531
2	RF-LH	0.105085
2	RF-LH	0.125326
2	RF-LH	0.0892857
2	RF-LH	0.0752688
2	RF-LH	0.0885609
2	RF-LH	0.125
2	RF-LH	0.138211
2	RF-LH	0.121622
2	RF-LH	0.0974729
2	RF-LH	0.111111
2	RF-LH	0.109804
2	RF-LH	0.0863787
2	RF-LH	0.144578
2	RF-LH	0.0949153
2	RF-LH	0.148594
2	RF-LH
2	RF-LH	0.0353357
2	RF-LH	0.083612
2	RF-LH	0.0868167
2	RF-LH	0.0852459
2	RF-LH	0.0848708
2	RF-LH	0.102113
2	RF-LH	0.135762
2	RF-LH	0.0786885
2	RF-LH	0.120743
2	RF-LH	0.103321
2	RF-LH	0.0872483
2	RF-LH	0.114695
2	RF-LH	0.0989399
2	RF-LH	0.0888158
2	RF-LH	0.0984848
2	RF-LH	0.101124
2	RF-LH	0.09375
2	RF-LH	0.115385
2	RF-LH	0.105263
2	RF-LH	0.128319
2	RF-LH	0.111969
2	RF-LH	0.118143
2	RF-LH	0.125
2	RF-LH	0.133603
2	RF-LH	0.116183
2	RF-LH	0.143396
2	RF-LH	0.0948905
2	RF-LH	0.0848708
2	RF-LH	0.125
2	RF-LH	0.0821918
2	RF-LH	0.110204
2	RF-LH	0.131868
2	RF-LH	0.0864662
2	RF-LH	0.139194
2	RF-LH	0.158996
2	RF-LH	0.101083
2	RF-LH	0.0935252
2	RF-LH	0.120879
2	RF-LH	0.0830325
2	RF-LH	0.0655738
2	RF-LH	0.114173
2	RF-LH	0.12766
2	RF-LH	0.101754
2	RF-LH	0.0813559
2	RF-LH	0.126623
2	RF-LH
2	RF-LH	0.112727
2	RF-LH	0.18593
2	RF-LH	0.171315
2	RF-LH	0.146853
2	RF-LH	0.109705
2	RF-LH	0.143885
2	RF-LH	0.0805861
2	RF-LH	0.120915
2	RF-LH	0.0783699
2	RF-LH	0.0712074
2	RF-LH	0.0828221
2	RF-LH	0.0989011
2	RF-LH	0.112121
2	RF-LH	0.0580645
2	RF-LH	0.133987
2	RF-LH	0.0966667
2	RF-LH	0.0992647
2	RF-LH	0.0809969
2	RF-LH	0.0827586
2	RF-LH	0.0554156
2	RF-LH	0.00327869
2	RF-LH	0.0952381
2	RF-LH	0.10687
2	RF-LH	0.109244
2	RF-LH	0.121849
2	RF-LH	0.107296
2	RF-LH	0.116541
2	RF-LH	0.10989
2	RF-LH	0.105085
2	RF-LH	0.11245
2	RF-LH	0.166667
2	RF-LH	0.0967742
2	RF-LH	0.117021
2	RF-LH	0.11039
2	RF-LH	0.0702341
2	RF-LH	0.110701
2	RF-LH	0.0971223
2	RF-LH
2	RF-LH
2	RF-LH	0.125874
2	RF-LH	0.0808081
2	RF-LH	0.110656
2	RF-LH	0.141343
2	RF-LH	0.133065
2	RF-LH	0.145985
2	RF-LH	0.10274
2	RF-LH	0.125475
2	RF-LH	0.162055
2	RF-LH	0.115523
2	RF-LH	0.132203
2	RF-LH	0.133065
2	RF-LH	0.160156
2	RF-LH	0.123506
2	RF-LH	0.143939
2	RF-LH	0.165179
2	RF-LH	0.188841
2	RF-LH	0.171806
2	RF-LH	0.168103
2	RF-LH	0.137037
2	RF-LH	0.126582
2	RF-LH	0.197531
2	RF-LH	0.138655
2	RF-LH	0.178261
2	RF-LH	0.169355
2	RF-LH	0.175
2	RF-LH	0.158915
2	RF-LH	0.128755
2	RF-LH	0.118959
2	RF-LH	0.100346
2	RF-LH	0.102362
2	RF-LH	0.120482
2	RF-LH	0.160494
2	RF-LH	0.180723
2	RF-LH	0.167347
2	RF-LH	0.172996
2	RF-LH
2	RF-LH	0.135314
2	RF-LH	0.0737463
2	RF-LH	0.117871
2	RF-LH	0.0614887
2	RF-LH	0.08
2	RF-LH	0.0909091
2	RF-LH	0.0732484
2	RF-LH	0.108696
2	RF-LH	0.0898204
2	RF-LH	0.0459459
2	RF-LH	0.0248756
2	RF-LH	0.0884718
2	RF-LH	0.0131579
2	RF-LH	0.0324484
2	RF-LH	0.0490798
2	RF-LH	0.0255102
2	RF-LH	0.027833
2	RF-LH	0.0990415
2	RF-LH	0.0648968
2	RF-LH	0.0454545
2	RF-LH	0.0482955
2	RF-LH	0.0594595
2	RF-LH	0.0448549
2	RF-LH	0.0952381
2	RF-LH	0.0308989
2	RF-LH	0.0775623
2	RF-LH	0.0668693
2	RF-LH	0.0316456
2	RF-LH	0.0664653
2	RF-LH	0.0576369
2	RF-LH	0.0582822
2	RF-LH	0.102389
2	RF-LH	0.0692042
2	RF-LH	0.111864
2	RF-LH	0.0921053
2	RF-LH	0.0906149
2	RF-LH	0.0546624
2	RF-LH	0.0541401
2	RF-LH	0.0677419
2	RF-LH	0.0756579
2	RF-LH	0.0735786
2	RF-LH	0.0841751
2	RF-LH	0.0853242
2	RF-LH	0.0802676
2	RF-LH	0.0791139
2	RF-LH
2	RF-RH
2	RF-RH
2	RF-RH
2	RF-RH	0.00952381
2	RF-RH
2	RF-RH	0.0658307
2	RF-RH
2	RF-RH
2	RF-RH
2	RF-RH
2	RF-RH
2	RF-RH	0.00647249
2	RF-RH
2	RF-RH
2	RF-RH	0.0334448
2	RF-RH
2	RF-RH	0.003367
2	RF-RH
2	RF-RH
2	RF-RH
2	RF-RH
2	RF-RH	0.00711744
2	RF-RH	0.0633333
2	RF-RH	0.00381679
2	RF-RH	0.00346021
2	RF-RH
2	RF-RH
2	RF-RH	0.0691824
2	RF-RH
2	RF-RH	0.00348432
2	RF-RH	0.0111111
2	RF-RH	0.0295203
2	RF-RH	0.0104895
2	RF-RH	0.0647249
2	RF-RH
2	RF-RH	0.0700637
2	RF-RH
2	RF-RH
2	RF-RH	0.0814332
2	RF-RH
2	RF-RH
2	RF-RH	0.0311526
2	RF-RH	0.0159744
2	RF-RH	0.113703
2	RF-RH	0.008
2	RF-RH	0.00696864
2	RF-RH	0.00357143
2	RF-RH
2	RF-RH	0.00692042
2	RF-RH	0.00318471
2	RF-RH	0.0113636
2	RF-RH	0.0121581
2	RF-RH	0.00350877
2	RF-RH	0.00355872
2	RF-RH	0.00331126
2	RF-RH	0.0278746
2	RF-RH
2	RF-RH	0.00682594
2	RF-RH
2	RF-RH	0.0714286
2	RF-RH
2	RF-RH	0.00666667
2	RF-RH
2	RF-RH	0.104987
2	RF-RH
2	RF-RH	0.00649351
2	RF-RH
2	RF-RH
2	RF-RH	0.0553746
2	RF-RH	0.0234899
2	RF-RH
2	RF-RH
2	RF-RH	0.0674847
2	RF-RH	0.003663
2	RF-RH
2	RF-RH
2	RF-RH	0.0196507
2	RF-RH
2	RF-RH	0.0776256
2	RF-RH	0.0356083
2	RF-RH
2	RF-RH
2	RF-RH
2	RF-RH	0.00680272
2	RF-RH	0.0145985
2	RF-RH
2	RF-RH	0.0726073
2	RF-RH	0.00784314
2	RF-RH
2	RF-RH	0.0844156
2	RF-RH	0.0159363
2	RF-RH
2	RF-RH	0.0273038
2	RF-RH	0.00671141
2	RF-RH
2	RF-RH
2	RF-RH
2	RF-RH
2	RF-RH
2	RF-RH	0.0794702
2	RF-RH
2	RF-RH	0.139456
2	RF-RH	0.0879121
2	RF-RH	0.109489
2	RF-RH	0.0805861
2	RF-RH
2	RF-RH
2	RF-RH
2	RF-RH
2	RF-RH	0.0372881
2	RF-RH	0.0287206
2	RF-RH
2	RF-RH
2	RF-RH
2	RF-RH	0.0798611
2	RF-RH	0.00406504
2	RF-RH	0.0810811
2	RF-RH	0.0902527
2	RF-RH	0.100358
2	RF-RH	0.0313725
2	RF-RH	0.0697674
2	RF-RH
2	RF-RH	0.0745763
2	RF-RH	0.0763052
2	RF-RH
2	RF-RH	0.00353357
2	RF-RH	0.00334448
2	RF-RH
2	RF-RH
2	RF-RH	0.0147601
2	RF-RH
2	RF-RH	0.00662252
2	RF-RH
2	RF-RH	0.0588235
2	RF-RH
2	RF-RH	0.033557
2	RF-RH	0.00716846
2	RF-RH	0.00706714
2	RF-RH	0.0657895
2	RF-RH	0.0113636
2	RF-RH	0.0224719
2	RF-RH	0.0763889
2	RF-RH	0.115385
2	RF-RH	0.101215
2	RF-RH	0.0353982
2	RF-RH	0.111969
2	RF-RH	0.101266
2	RF-RH	0.1
2	RF-RH	0.109312
2	RF-RH	0.0290456
2	RF-RH	0.0188679
2	RF-RH	0.0328467
2	RF-RH	0.0405904
2	RF-RH	0.0367647
2	RF-RH	0.0753425
2	RF-RH	0.0122449
2	RF-RH	0.029304
2	RF-RH	0.018797
2	RF-RH	0.0989011
2	RF-RH	0.0125523
2	RF-RH	0.0180505
2	RF-RH	0.0179856
2	RF-RH	0.021978
2	RF-RH	0.0144404
2	RF-RH	0.0688525
2	RF-RH	0.015748
2	RF-RH	0.0035461
2	RF-RH	0.0210526
2	RF-RH
2	RF-RH
2	RF-RH
2	RF-RH	0.105455
2	RF-RH	0.130653
2	RF-RH	0.00796813
2	RF-RH	0.0734266
2	RF-RH	0.109705
2	RF-RH	0.0935252
2	RF-RH	0.00732601
2	RF-RH
2	RF-RH	0.0031348
2	RF-RH
2	RF-RH
2	RF-RH	0.0549451
2	RF-RH	0.0848485
2	RF-RH	0.0709677
2	RF-RH	0.0751634
2	RF-RH	0.0666667
2	RF-RH	0.0110294
2	RF-RH	0.0747664
2	RF-RH
2	RF-RH
2	RF-RH	0.0491803
2	RF-RH	0.0825397
2	RF-RH	0.114504
2	RF-RH	0.130252
2	RF-RH	0.105042
2	RF-RH	0.0128755
2	RF-RH	0.0112782
2	RF-RH	0.014652
2	RF-RH	0.101695
2	RF-RH	0.0200803
2	RF-RH	0.0212766
2	RF-RH	0.0430108
2	RF-RH	0.0248227
2	RF-RH	0.025974
2	RF-RH	0.0367893
2	RF-RH	0.0221402
2	RF-RH
2	RF-RH
2	RF-RH
2	RF-RH	0.0174825
2	RF-RH	0.0909091
2	RF-RH	0.0286885
2	RF-RH	0.0706714
2	RF-RH	0.0120968
2	RF-RH	0.00364964
2	RF-RH	0.0684932
2	RF-RH	0.0798479
2	RF-RH
2	RF-RH
2	RF-RH	0.0745763
2	RF-RH	0.100806
2	RF-RH	0.101562
2	RF-RH	0.0159363
2	RF-RH	0.113636
2	RF-RH	0.120536
2	RF-RH	0.0944206
2	RF-RH	0.140969
2	RF-RH	0.0258621
2	RF-RH	0.0962963
2	RF-RH	0.118143
2	RF-RH	0.0987654
2	RF-RH	0.117647
2	RF-RH	0.121739
2	RF-RH	0.0967742
2	RF-RH	0.1125
2	RF-RH	0.108527
2	RF-RH
2	RF-RH	0.0223048
2	RF-RH	0.0899654
2	RF-RH	0.114173
2	RF-RH	0.0923695
2	RF-RH	0.0987654
2	RF-RH	0.0963855
2	RF-RH	0.106122
2	RF-RH	0.118143
2	RF-RH
2	RF-RH	0.148515
2	RF-RH	0.0294985
2	RF-RH	0.0494297
2	RF-RH
2	RF-RH	0.08
2	RF-RH	0.027668
2	RF-RH	0.0191083
2	RF-RH
2	RF-RH
2	RF-RH	0.0108108
2	RF-RH	0.0223881
2	RF-RH	0.0134048
2	RF-RH
2	RF-RH	0.0766962
2	RF-RH
2	RF-RH	0.0612245
2	RF-RH	0.0477137
2	RF-RH	0.0670927
2	RF-RH
2	RF-RH	0.00568182
2	RF-RH
2	RF-RH	0.0378378
2	RF-RH	0.0263852
2	RF-RH	0.0626566
2	RF-RH
2	RF-RH	0.00554017
2	RF-RH	0.0243161
2	RF-RH
2	RF-RH
2	RF-RH	0.00576369
2	RF-RH	0.0337423
2	RF-RH	0.0443686
2	RF-RH	0.0276817
2	RF-RH	0.0237288
2	RF-RH	0.0296053
2	RF-RH	0.0194175
2	RF-RH	0.0289389
2	RF-RH
2	RF-RH	0.00322581
2	RF-RH	0.0230263
2	RF-RH
2	RF-RH
2	RF-RH	0.0102389
2	RF-RH
2	RF-RH	0.0158228
2	RF-RH
2	LF-LH	0.0275591
2	LF-LH	0.0211268
2	LF-LH
2	LF-LH
2	LF-LH	0.115016
2	LF-LH
2	LF-LH	0.132143
2	LF-LH	0.105802
2	LF-LH
2	LF-LH
2	LF-LH	0.0921053
2	LF-LH
2	LF-LH	0.0278638
2	LF-LH
2	LF-LH
2	LF-LH
2	LF-LH
2	LF-LH	0.0418118
2	LF-LH
2	LF-LH
2	LF-LH
2	LF-LH
2	LF-LH
2	LF-LH
2	LF-LH
2	LF-LH	0.00327869
2	LF-LH	0.0127796
2	LF-LH	0.0125786
2	LF-LH
2	LF-LH
2	LF-LH	0.0185185
2	LF-LH	0.0147601
2	LF-LH
2	LF-LH
2	LF-LH	0.0342205
2	LF-LH	0.0286624
2	LF-LH
2	LF-LH
2	LF-LH	0.0162866
2	LF-LH
2	LF-LH
2	LF-LH	0.105919
2	LF-LH
2	LF-LH	0.0932945
2	LF-LH	0.012
2	LF-LH
2	LF-LH	0.0285714
2	LF-LH
2	LF-LH
2	LF-LH
2	LF-LH	0.113636
2	LF-LH	0.130699
2	LF-LH	0.0140351
2	LF-LH
2	LF-LH
2	LF-LH
2	LF-LH
2	LF-LH	0.00682594
2	LF-LH
2	LF-LH
2	LF-LH
2	LF-LH
2	LF-LH	0.0165563
2	LF-LH
2	LF-LH	0.102236
2	LF-LH
2	LF-LH
2	LF-LH	0.0733138
2	LF-LH	0.107492
2	LF-LH
2	LF-LH
2	LF-LH	0.0169492
2	LF-LH
2	LF-LH
2	LF-LH
2	LF-LH
2	LF-LH	0.0327511
2	LF-LH	0.0583554
2	LF-LH	0.0410959
2	LF-LH	0.00593472
2	LF-LH
2	LF-LH
2	LF-LH	0.122807
2	LF-LH	0.105442
2	LF-LH	0.0145985
2	LF-LH
2	LF-LH
2	LF-LH
2	LF-LH
2	LF-LH	0.00649351
2	LF-LH
2	LF-LH
2	LF-LH
2	LF-LH
2	LF-LH	0.0779661
2	LF-LH
2	LF-LH
2	LF-LH	0.0174825
2	LF-LH	0.0213523
2	LF-LH
2	LF-LH
2	LF-LH	0.0170068
2	LF-LH	0.021978
2	LF-LH
2	LF-LH
2	LF-LH	0.0201613
2	LF-LH
2	LF-LH
2	LF-LH
2	LF-LH	0.00677966
2	LF-LH
2	LF-LH
2	LF-LH	0.0286738
2	LF-LH
2	LF-LH
2	LF-LH
2	LF-LH
2	LF-LH
2	LF-LH	0.0143369
2	LF-LH
2	LF-LH
2	LF-LH
2	LF-LH	0.020339
2	LF-LH
2	LF-LH
2	LF-LH	0.0530035
2	LF-LH
2	LF-LH	0.0675241
2	LF-LH
2	LF-LH	0.0147601
2	LF-LH
2	LF-LH	0.0927152
2	LF-LH
2	LF-LH	0.0402477
2	LF-LH
2	LF-LH	0.0939597
2	LF-LH
2	LF-LH
2	LF-LH	0.0855263
2	LF-LH
2	LF-LH
2	LF-LH
2	LF-LH	0.00769231
2	LF-LH	0.00809717
2	LF-LH	0.00884956
2	LF-LH
2	LF-LH	0.0126582
2	LF-LH	0.0125
2	LF-LH
2	LF-LH
2	LF-LH
2	LF-LH
2	LF-LH
2	LF-LH
2	LF-LH
2	LF-LH
2	LF-LH
2	LF-LH	0.0037594
2	LF-LH	0.010989
2	LF-LH
2	LF-LH
2	LF-LH
2	LF-LH
2	LF-LH
2	LF-LH	0.00327869
2	LF-LH	0.00787402
2	LF-LH
2	LF-LH
2	LF-LH
2	LF-LH	0.0974026
2	LF-LH
2	LF-LH	0.123636
2	LF-LH	0.0452261
2	LF-LH	0.00796813
2	LF-LH	0.034965
2	LF-LH	0.0379747
2	LF-LH
2	LF-LH
2	LF-LH
2	LF-LH	0.0501567
2	LF-LH
2	LF-LH	0.0981595
2	LF-LH	0.0824176
2	LF-LH	0.0454545
2	LF-LH
2	LF-LH
2	LF-LH
2	LF-LH
2	LF-LH
2	LF-LH	0.1
2	LF-LH
2	LF-LH	0.0852459
2	LF-LH
2	LF-LH	0.0229008
2	LF-LH	0.0966387
2	LF-LH	0.0252101
2	LF-LH	0.0214592
2	LF-LH	0.0037594
2	LF-LH
2	LF-LH
2	LF-LH	0.00401606
2	LF-LH
2	LF-LH
2	LF-LH	0.0106383
2	LF-LH
2	LF-LH
2	LF-LH	0.00369004
2	LF-LH	0.00719424
2	LF-LH
2	LF-LH
2	LF-LH
2	LF-LH	0.00673401
2	LF-LH	0.00819672
2	LF-LH
2	LF-LH
2	LF-LH
2	LF-LH
2	LF-LH
2	LF-LH
2	LF-LH
2	LF-LH
2	LF-LH	0.0120968
2	LF-LH
2	LF-LH
2	LF-LH	0.0719697
2	LF-LH	0.0178571
2	LF-LH	0.0128755
2	LF-LH	0.092511
2	LF-LH
2	LF-LH	0.0037037
2	LF-LH	0.00843882
2	LF-LH	0.00411523
2	LF-LH
2	LF-LH	0.0869565
2	LF-LH	0.00806452
2	LF-LH	0.0166667
2	LF-LH
2	LF-LH	0.00429185
2	LF-LH
2	LF-LH
2	LF-LH	0.0787402
2	LF-LH
2	LF-LH
2	LF-LH	0.00401606
2	LF-LH	0.00408163
2	LF-LH	0.00421941
2	LF-LH
2	LF-LH	0.029703
2	LF-LH	0.0560472
2	LF-LH	0.0988593
2	LF-LH	0.00323625
2	LF-LH	0.0553846
2	LF-LH	0.00395257
2	LF-LH	0.0955414
2	LF-LH
2	LF-LH
2	LF-LH	0.0567568
2	LF-LH	0.00497512
2	LF-LH	0.0589812
2	LF-LH	0.0605263
2	LF-LH	0.0884956
2	LF-LH	0.0858896
2	LF-LH	0.0357143
2	LF-LH
2	LF-LH	0.0990415
2	LF-LH
2	LF-LH	0.0823864
2	LF-LH	0.0482955
2	LF-LH	0.110811
2	LF-LH	0.00791557
2	LF-LH	0.0426065
2	LF-LH	0.0421348
2	LF-LH	0.0747922
2	LF-LH
2	LF-LH
2	LF-LH	0.00302115
2	LF-LH	0.0893372
2	LF-LH
2	LF-LH	0.0819113
2	LF-LH
2	LF-LH
2	LF-LH
2	LF-LH
2	LF-LH
2	LF-LH
2	LF-LH
2	LF-LH
2	LF-LH
2	LF-LH
2	LF-LH
2	LF-LH
2	LF-LH
2	LF-LH
3	LF-RH
3	LF-RH
3	LF-RH	0.0404858
3	LF-RH	0.0494297
3	LF-RH	0.0470085
3	LF-RH	0.062963
3	LF-RH	0.0632411
3	LF-RH	0.0830189
3	LF-RH	0.0753138
3	LF-RH	0.0858369
3	LF-RH	0.0686695
3	LF-RH	0.0776256
3	LF-RH	0.0943396
3	LF-RH	0.124402
3	LF-RH	0.084507
3	LF-RH	0.0837209
3	LF-RH	0.0981308
3	LF-RH	0.0917431
3	LF-RH	0.116822
3	LF-RH	0.0825688
3	LF-RH	0.104803
3	LF-RH	0.0859729
3	LF-RH	0.111111
3	LF-RH	0.0711111
3	LF-RH	0.0678733
3	LF-RH	0.0981308
3	LF-RH	0.125604
3	LF-RH	0.0921659
3	LF-RH	0.0737705
3	LF-RH	0.0526316
3	LF-RH	0.081448
3	LF-RH	0.09375
3	LF-RH	0.0956522
3	LF-RH	0.0779221
3	LF-RH	0.0672646
3	LF-RH	0.0281385
3	LF-RH	0.0304183
3	LF-RH	0.0850202
3	LF-RH	0.0893617
3	LF-RH	0.106195
3	LF-RH	0.0909091
3	LF-RH	0.0746269
3	LF-RH
3	LF-RH	0.0614754
3	LF-RH	0.0656371
3	LF-RH	0.0516605
3	LF-RH	0.088
3	LF-RH	0.059633
3	LF-RH	0.0610687
3	LF-RH	0.0748031
3	LF-RH	0.0778689
3	LF-RH	0.0571429
3	LF-RH	0.0588235
3	LF-RH	0.0669014
3	LF-RH	0.0557491
3	LF-RH	0.070922
3	LF-RH	0.0570342
3	LF-RH	0.0447761
3	LF-RH	0.0657895
3	LF-RH	0.0863636
3	LF-RH	0.0987124
3	LF-RH	0.08
3	LF-RH	0.0943396
3	LF-RH	0.00591716
3	LF-RH	0.0238663
3	LF-RH	0.0572139
3	LF-RH	0.0736434
3	LF-RH	0.021875
3	LF-RH	0.0541516
3	LF-RH	0.0729614
3	LF-RH	0.0732759
3	LF-RH	0.0720339
3	LF-RH	0.0857143
3	LF-RH	0.096
3	LF-RH	0.0948617
3	LF-RH
3	LF-RH
3	LF-RH	0.052381
3	LF-RH	0.0913462
3	LF-RH	0.109005
3	LF-RH	0.0995475
3	LF-RH	0.100917
3	LF-RH	0.0963303
3	LF-RH	0.130841
3	LF-RH	0.123223
3	LF-RH	0.123762
3	LF-RH	0.165829
3	LF-RH	0.147619
3	LF-RH	0.107981
3	LF-RH	0.127854
3	LF-RH	0.108597
3	LF-RH	0.0967742
3	LF-RH	0.133333
3	LF-RH	0.142157
3	LF-RH	0.15534
3	LF-RH	0.112745
3	LF-RH	0.153061
3	LF-RH	0.126904
3	LF-RH	0.11165
3	LF-RH	0.130233
3	LF-RH	0.0779817
3	LF-RH	0.109649
3	LF-RH	0.0746888
3	LF-RH	0.0787037
3	LF-RH	0.141509
3	LF-RH	0.112676
3	LF-RH	0.148837
3	LF-RH	0.146919
3	LF-RH	0.14218
3	LF-RH	0.102804
3	LF-RH	0.0990991
3	LF-RH	0.0782609
3	LF-RH
3	LF-RH	0.037415
3	LF-RH	0.0354331
3	LF-RH	0.0658436
3	LF-RH	0.056391
3	LF-RH	0.0496894
3	LF-RH	0.0567686
3	LF-RH	0.0460251
3	LF-RH	0.0779817
3	LF-RH	0.0892019
3	LF-RH	0.115741
3	LF-RH	0.0966387
3	LF-RH	0.0691057
3	LF-RH	0.0581395
3	LF-RH	0.0730994
3	LF-RH
3	LF-RH	0.0353357
3	LF-RH	0.0479705
3	LF-RH	0.0851064
3	LF-RH	0.14433
3	LF-RH	0.12766
3	LF-RH	0.107981
3	LF-RH	0.119658
3	LF-RH	0.103704
3	LF-RH	0.0933852
3	LF-RH	0.0346821
3	LF-RH	0.0398551
3	LF-RH
3	RF-LH	0.10274
3	RF-LH	0.0546875
3	RF-LH	0.0566802
3	RF-LH	0.0494297
3	RF-LH	0.106838
3	RF-LH	0.0777778
3	RF-LH	0.102767
3	RF-LH	0.10566
3	RF-LH	0.112971
3	RF-LH	0.103004
3	RF-LH	0.111588
3	RF-LH	0.114155
3	RF-LH	0.117925
3	RF-LH	0.148325
3	RF-LH	0.131455
3	RF-LH	0.134884
3	RF-LH	0.116822
3	RF-LH	0.146789
3	RF-LH	0.130841
3	RF-LH	0.155963
3	RF-LH	0.139738
3	RF-LH	0.117647
3	RF-LH	0.12963
3	RF-LH	0.124444
3	RF-LH	0.122172
3	RF-LH	0.140187
3	RF-LH	0.140097
3	RF-LH	0.138249
3	RF-LH	0.131148
3	RF-LH	0.121457
3	RF-LH	0.113122
3	RF-LH	0.120536
3	RF-LH	0.130435
3	RF-LH	0.125541
3	RF-LH	0.130045
3	RF-LH	0.034632
3	RF-LH	0.095057
3	RF-LH	0.109312
3	RF-LH	0.119149
3	RF-LH	0.0973451
3	RF-LH	0.12253
3	RF-LH	0.0970149
3	RF-LH
3	RF-LH	0.0942623
3	RF-LH	0.0810811
3	RF-LH	0.095941
3	RF-LH	0.116
3	RF-LH	0.123853
3	RF-LH	0.10687
3	RF-LH	0.122047
3	RF-LH	0.106557
3	RF-LH	0.0685714
3	RF-LH	0.109244
3	RF-LH	0.105634
3	RF-LH	0.0940767
3	RF-LH	0.0744681
3	RF-LH	0.106464
3	RF-LH	0.0783582
3	RF-LH	0.118421
3	RF-LH	0.113636
3	RF-LH	0.133047
3	RF-LH	0.124
3	RF-LH	0.10566
3	RF-LH	0.0798817
3	RF-LH	0.0334129
3	RF-LH
3	RF-LH	0.0930233
3	RF-LH	0.1
3	RF-LH	0.0469314
3	RF-LH	0.111588
3	RF-LH	0.0948276
3	RF-LH	0.110169
3	RF-LH	0.110204
3	RF-LH	0.136
3	RF-LH	0.130435
3	RF-LH
3	RF-LH	0.0368852
3	RF-LH	0.0761905
3	RF-LH	0.115385
3	RF-LH	0.137441
3	RF-LH	0.140271
3	RF-LH	0.114679
3	RF-LH	0.146789
3	RF-LH	0.149533
3	RF-LH	0.156398
3	RF-LH	0.168317
3	RF-LH	0.18593
3	RF-LH	0.17619
3	RF-LH	0.15493
3	RF-LH	0.13242
3	RF-LH	0.158371
3	RF-LH	0.152074
3	RF-LH	0.152381
3	RF-LH	0.156863
3	RF-LH	0.169903
3	RF-LH	0.171569
3	RF-LH	0.163265
3	RF-LH	0.177665
3	RF-LH	0.169903
3	RF-LH	0.15814
3	RF-LH	0.12844
3	RF-LH	0.131579
3	RF-LH	0.13278
3	RF-LH	0.106481
3	RF-LH	0.146226
3	RF-LH	0.15493
3	RF-LH	0.153488
3	RF-LH	0.146919
3	RF-LH	0.161137
3	RF-LH	0.140187
3	RF-LH	0.153153
3	RF-LH	0.126087
3	RF-LH
3	RF-LH	0.0272109
3	RF-LH	0.114173
3	RF-LH	0.0740741
3	RF-LH	0.075188
3	RF-LH	0.0931677
3	RF-LH	0.126638
3	RF-LH	0.112971
3	RF-LH	0.123853
3	RF-LH	0.103286
3	RF-LH	0.12963
3	RF-LH	0.12605
3	RF-LH	0.113821
3	RF-LH	0.108527
3	RF-LH	0.0906433
3	RF-LH	0.149635
3	RF-LH	0.0600707
3	RF-LH	0.0516605
3	RF-LH	0.0992908
3	RF-LH	0.149485
3	RF-LH	0.175532
3	RF-LH	0.150235
3	RF-LH	0.141026
3	RF-LH	0.140741
3	RF-LH	0.128405
3	RF-LH	0.0549133
3	RF-LH	0.115942
3	RF-LH
3	RF-RH	0.0342466
3	RF-RH	0.0507812
3	RF-RH	0.0566802
3	RF-RH	0.114068
3	RF-RH	0.0384615
3	RF-RH	0.1
3	RF-RH	0.0395257
3	RF-RH	0.109434
3	RF-RH	0.129707
3	RF-RH	0.124464
3	RF-RH	0.120172
3	RF-RH	0.136986
3	RF-RH	0.132075
3	RF-RH	0.129187
3	RF-RH	0.126761
3	RF-RH	0.125581
3	RF-RH	0.126168
3	RF-RH	0.123853
3	RF-RH	0.130841
3	RF-RH	0.12844
3	RF-RH	0.135371
3	RF-RH	0.140271
3	RF-RH	0.115741
3	RF-RH	0.106667
3	RF-RH	0.135747
3	RF-RH	0.130841
3	RF-RH	0.130435
3	RF-RH	0.133641
3	RF-RH	0.151639
3	RF-RH	0.109312
3	RF-RH	0.122172
3	RF-RH	0.125
3	RF-RH	0.130435
3	RF-RH	0.116883
3	RF-RH	0.0313901
3	RF-RH	0.0108225
3	RF-RH	0.0988593
3	RF-RH	0.105263
3	RF-RH	0.131915
3	RF-RH	0.119469
3	RF-RH	0.106719
3	RF-RH	0.0783582
3	RF-RH
3	RF-RH	0.0614754
3	RF-RH	0.042471
3	RF-RH	0.103321
3	RF-RH	0.124
3	RF-RH	0.0550459
3	RF-RH	0.103053
3	RF-RH	0.110236
3	RF-RH	0.0204918
3	RF-RH	0.0771429
3	RF-RH	0.0378151
3	RF-RH	0.0316901
3	RF-RH	0.0174216
3	RF-RH	0.0744681
3	RF-RH	0.0380228
3	RF-RH	0.108209
3	RF-RH	0.127193
3	RF-RH	0.127273
3	RF-RH	0.107296
3	RF-RH	0.108
3	RF-RH
3	RF-RH
3	RF-RH	0.0310263
3	RF-RH	0.0149254
3	RF-RH	0.0271318
3	RF-RH	0.0375
3	RF-RH	0.0938628
3	RF-RH	0.128755
3	RF-RH	0.116379
3	RF-RH	0.114407
3	RF-RH	0.102041
3	RF-RH	0.092
3	RF-RH	0.083004
3	RF-RH
3	RF-RH	0.163934
3	RF-RH	0.147619
3	RF-RH	0.139423
3	RF-RH	0.123223
3	RF-RH	0.126697
3	RF-RH	0.114679
3	RF-RH	0.119266
3	RF-RH	0.116822
3	RF-RH	0.113744
3	RF-RH	0.123762
3	RF-RH	0.115578
3	RF-RH	0.114286
3	RF-RH	0.117371
3	RF-RH	0.118721
3	RF-RH	0.108597
3	RF-RH	0.119816
3	RF-RH	0.109524
3	RF-RH	0.107843
3	RF-RH	0.116505
3	RF-RH	0.117647
3	RF-RH	0.122449
3	RF-RH	0.121827
3	RF-RH	0.126214
3	RF-RH	0.130233
3	RF-RH	0.133028
3	RF-RH	0.114035
3	RF-RH	0.112033
3	RF-RH	0.134259
3	RF-RH	0.113208
3	RF-RH	0.122066
3	RF-RH	0.125581
3	RF-RH	0.123223
3	RF-RH	0.118483
3	RF-RH	0.116822
3	RF-RH	0.117117
3	RF-RH	0.113043
3	RF-RH
3	RF-RH	0.0306122
3	RF-RH	0.0551181
3	RF-RH	0.0452675
3	RF-RH	0.120301
3	RF-RH	0.0124224
3	RF-RH	0.0349345
3	RF-RH	0.121339
3	RF-RH	0.142202
3	RF-RH	0.131455
3	RF-RH	0.12963
3	RF-RH	0.109244
3	RF-RH	0.105691
3	RF-RH	0.100775
3	RF-RH	0.0204678
3	RF-RH
3	RF-RH	0.106007
3	RF-RH	0.103321
3	RF-RH	0.0780142
3	RF-RH	0.123711
3	RF-RH	0.143617
3	RF-RH	0.131455
3	RF-RH	0.111111
3	RF-RH	0.0851852
3	RF-RH	0.116732
3	RF-RH	0.0202312
3	RF-RH	0.0108696
3	RF-RH
3	LF-LH	0.0273973
3	LF-LH	0.113281
3	LF-LH	0.0566802
3	LF-LH	0.0532319
3	LF-LH	0.042735
3	LF-LH	0.103704
3	LF-LH	0.0395257
3	LF-LH	0.0301887
3	LF-LH	0.0502092
3	LF-LH	0.0944206
3	LF-LH	0.124464
3	LF-LH	0.0958904
3	LF-LH	0.122642
3	LF-LH	0.124402
3	LF-LH	0.14554
3	LF-LH	0.125581
3	LF-LH	0.11215
3	LF-LH	0.155963
3	LF-LH	0.116822
[truncated: 11,813 more rows]

## Sheet: speed normalized tripedal
cow_nr	limb	Var3
1	no LF	0.207031
1	no LF	0.122605
1	no LF	0.180851
1	no LF	0.123077
1	no LF	0.166667
1	no LF	0.121094
1	no LF	0.107407
1	no LF	0.101974
1	no LF	0.134146
1	no LF	0.1
1	no LF	0.0942623
1	no LF	0.187075
1	no LF	0.104839
1	no LF	0.0888889
1	no LF	0.16609
1	no LF	0.0923077
1	no LF	0.174497
1	no LF	0.110727
1	no LF	0.144487
1	no LF	0.118081
1	no LF	0.208191
1	no LF	0.175439
1	no LF	0.126437
1	no LF	0.124464
1	no LF	0.164234
1	no LF	0.105839
1	no LF	0.106299
1	no LF	0.107011
1	no LF	0.09699
1	no LF
1	no LF	0.14841
1	no LF	0.153584
1	no LF	0.15415
1	no LF	0.176923
1	no LF	0.133891
1	no LF	0.206612
1	no LF	0.166667
1	no LF	0.168142
1	no LF	0.143478
1	no LF	0.172691
1	no LF	0.198529
1	no LF	0.180645
1	no LF	0.0942249
1	no LF	0.143293
1	no LF	0.197411
1	no LF	0.135593
1	no LF	0.119134
1	no LF	0.111888
1	no LF	0.106383
1	no LF	0.103704
1	no LF	0.106464
1	no LF	0.10989
1	no LF	0.108772
1	no LF	0.0925373
1	no LF
1	no LF	0.187251
1	no LF	0.119266
1	no LF	0.0973451
1	no LF	0.0978723
1	no LF	0.1
1	no LF	0.0905172
1	no LF	0.104167
1	no LF	0.097561
1	no LF	0.0912698
1	no LF	0.1
1	no LF	0.10084
1	no LF	0.0946502
1	no LF	0.102767
1	no LF	0.101215
1	no LF	0.109705
1	no LF	0.16609
1	no LF	0.142202
1	no LF	0.161417
1	no LF	0.119048
1	no LF	0.116379
1	no LF	0.125523
1	no LF	0.121457
1	no LF	0.115538
1	no LF	0.11245
1	no LF	0.106122
1	no LF	0.102881
1	no LF	0.0984848
1	no LF	0.0712531
1	no LF	0.137037
1	no LF	0.153846
1	no LF	0.091195
1	no LF	0.115265
1	no LF	0.108
1	no LF	0.171975
1	no LF	0.105839
1	no LF	0.105882
1	no LF	0.0943396
1	no LF	0.100372
1	no LF	0.103175
1	no LF	0.177358
1	no LF	0.110132
1	no LF
1	no RF	0.128906
1	no RF	0.122605
1	no RF	0.0957447
1	no RF	0.207692
1	no RF	0.100694
1	no RF	0.0976562
1	no RF	0.1
1	no RF	0.111842
1	no RF	0.097561
1	no RF	0.0916667
1	no RF	0.106557
1	no RF	0.0816327
1	no RF	0.0967742
1	no RF	0.214815
1	no RF	0.0968858
1	no RF	0.0961538
1	no RF	0.0939597
1	no RF	0.204152
1	no RF	0.197719
1	no RF	0.195572
1	no RF	0.143345
1	no RF	0.164912
1	no RF	0.103448
1	no RF	0.107296
1	no RF	0.0985401
1	no RF	0.178832
1	no RF	0.0984252
1	no RF	0.103321
1	no RF	0.09699
1	no RF
1	no RF	0.183746
1	no RF	0.194539
1	no RF	0.130435
1	no RF	0.130769
1	no RF	0.125523
1	no RF	0.123967
1	no RF	0.186992
1	no RF	0.172566
1	no RF	0.178261
1	no RF	0.172691
1	no RF	0.176471
1	no RF	0.158065
1	no RF	0.176292
1	no RF	0.195122
1	no RF	0.168285
1	no RF	0.115254
1	no RF	0.0974729
1	no RF	0.108392
1	no RF	0.166667
1	no RF	0.185185
1	no RF	0.0988593
1	no RF	0.0952381
1	no RF	0.0947368
1	no RF	0.197015
1	no RF
1	no RF	0.199203
1	no RF	0.12844
1	no RF	0.0929204
1	no RF	0.093617
1	no RF	0.104348
1	no RF	0.0948276
1	no RF	0.108333
1	no RF	0.105691
1	no RF	0.103175
1	no RF	0.104167
1	no RF	0.0882353
1	no RF	0.111111
1	no RF	0.106719
1	no RF	0.149798
1	no RF	0.206751
1	no RF	0.131488
1	no RF	0.137615
1	no RF	0.0905512
1	no RF	0.115079
1	no RF	0.12931
1	no RF	0.117155
1	no RF	0.121457
1	no RF	0.10757
1	no RF	0.104418
1	no RF	0.0979592
1	no RF	0.102881
1	no RF	0.106061
1	no RF	0.113022
1	no RF	0.107407
1	no RF	0.0909091
1	no RF	0.138365
1	no RF	0.11215
1	no RF	0.116
1	no RF	0.0987261
1	no RF	0.0985401
1	no RF	0.0941176
1	no RF	0.101887
1	no RF	0.107807
1	no RF	0.115079
1	no RF	0.0943396
1	no RF	0.114537
1	no RF
1	no LH	0.183594
1	no LH	0.218391
1	no LH	0.163121
1	no LH	0.203846
1	no LH	0.177083
1	no LH	0.175781
1	no LH	0.192593
1	no LH	0.207237
1	no LH	0.174797
1	no LH	0.158333
1	no LH	0.180328
1	no LH	0.170068
1	no LH	0.173387
1	no LH	0.262963
1	no LH	0.176471
1	no LH	0.215385
1	no LH	0.174497
1	no LH	0.197232
1	no LH	0.193916
1	no LH	0.177122
1	no LH	0.187713
1	no LH	0.178947
1	no LH	0.168582
1	no LH	0.201717
1	no LH	0.0948905
1	no LH	0.171533
1	no LH	0.173228
1	no LH	0.154982
1	no LH	0.307692
1	no LH
1	no LH	0.222615
1	no LH	0.211604
1	no LH	0.193676
1	no LH	0.188462
1	no LH	0.209205
1	no LH	0.165289
1	no LH	0.178862
1	no LH	0.168142
1	no LH	0.221739
1	no LH	0.136546
1	no LH	0.231618
1	no LH	0.183871
1	no LH	0.25228
1	no LH	0.192073
1	no LH	0.2589
1	no LH	0.223729
1	no LH	0.187726
1	no LH	0.185315
1	no LH	0.187943
1	no LH	0.177778
1	no LH	0.174905
1	no LH	0.157509
1	no LH	0.178947
1	no LH	0.244776
1	no LH
1	no LH	0.207171
1	no LH	0.16055
1	no LH	0.137168
1	no LH	0.165957
1	no LH	0.143478
1	no LH	0.181034
1	no LH	0.15
1	no LH	0.174797
1	no LH	0.166667
1	no LH	0.179167
1	no LH	0.168067
1	no LH	0.17284
1	no LH	0.177866
1	no LH	0.214575
1	no LH	0.198312
1	no LH	0.204152
1	no LH	0.201835
1	no LH	0.181102
1	no LH	0.162698
1	no LH	0.168103
1	no LH	0.146444
1	no LH	0.17004
1	no LH	0.171315
1	no LH	0.136546
1	no LH	0.163265
1	no LH	0.135802
1	no LH	0.181818
1	no LH	0.447174
1	no LH	0.218519
1	no LH	0.185315
1	no LH	0.204403
1	no LH	0.180685
1	no LH	0.216
1	no LH	0.178344
1	no LH	0.189781
1	no LH	0.180392
1	no LH	0.211321
1	no LH	0.193309
1	no LH	0.198413
1	no LH	0.150943
1	no LH	0.162996
1	no LH
1	no RH	0.21875
1	no RH	0.183908
1	no RH	0.20922
1	no RH	0.234615
1	no RH	0.173611
1	no RH	0.171875
1	no RH	0.162963
1	no RH	0.177632
1	no RH	0.166667
1	no RH	0.154167
1	no RH	0.17623
1	no RH	0.0884354
1	no RH	0.16129
1	no RH	0.137037
1	no RH	0.16609
1	no RH	0.169231
1	no RH	0.154362
1	no RH	0.176471
1	no RH	0.18251
1	no RH	0.236162
1	no RH	0.102389
1	no RH	0.178947
1	no RH	0.226054
1	no RH	0.158798
1	no RH	0.142336
1	no RH	0.182482
1	no RH	0.153543
1	no RH	0.158672
1	no RH	0.190635
1	no RH
1	no RH	0.268551
1	no RH	0.228669
1	no RH	0.241107
1	no RH	0.207692
1	no RH	0.175732
1	no RH	0.181818
1	no RH	0.195122
1	no RH	0.199115
1	no RH	0.191304
1	no RH	0.180723
1	no RH	0.213235
1	no RH	0.170968
1	no RH	0.203647
1	no RH	0.253049
1	no RH	0.194175
1	no RH	0.220339
1	no RH	0.223827
1	no RH	0.181818
1	no RH	0.173759
1	no RH	0.166667
1	no RH	0.148289
1	no RH	0.14652
1	no RH	0.161404
1	no RH	0.152239
1	no RH
1	no RH	0.151394
1	no RH	0.238532
1	no RH	0.163717
1	no RH	0.170213
1	no RH	0.147826
1	no RH	0.137931
1	no RH	0.183333
1	no RH	0.178862
1	no RH	0.154762
1	no RH	0.145833
1	no RH	0.205882
1	no RH	0.185185
1	no RH	0.189723
1	no RH	0.137652
1	no RH	0.189873
1	no RH	0.141869
1	no RH	0.247706
1	no RH	0.161417
1	no RH	0.174603
1	no RH	0.181034
1	no RH	0.200837
1	no RH	0.165992
1	no RH	0.183267
1	no RH	0.172691
1	no RH	0.155102
1	no RH	0.156379
1	no RH	0.155303
1	no RH	0.0786241
1	no RH	0.2
1	no RH	0.185315
1	no RH	0.116352
1	no RH	0.242991
1	no RH	0.204
1	no RH	0.159236
1	no RH	0.189781
1	no RH	0.156863
1	no RH	0.2
1	no RH	0.163569
1	no RH	0.210317
1	no RH	0.192453
1	no RH	0.171806
1	no RH
2	no LF	0.106299
2	no LF	0.179577
2	no LF
2	no LF	0.203175
2	no LF	0.185304
2	no LF
2	no LF	0.153571
2	no LF	0.215017
2	no LF	0.206897
2	no LF
2	no LF	0.203947
2	no LF
2	no LF	0.204334
2	no LF	0.209677
2	no LF
2	no LF	0.210345
2	no LF
2	no LF	0.205575
2	no LF	0.20678
2	no LF	0.207018
2	no LF	0.204861
2	no LF	0.209964
2	no LF	0.19
2	no LF	0.129771
2	no LF	0.207612
2	no LF	0.196721
2	no LF	0.223642
2	no LF
2	no LF	0.135531
2	no LF	0.219512
2	no LF	0.192593
2	no LF	0.206642
2	no LF	0.202797
2	no LF	0.203883
2	no LF	0.144487
2	no LF	0.194268
2	no LF	0.151852
2	no LF	0.185185
2	no LF
2	no LF	0.133094
2	no LF
2	no LF	0.183801
2	no LF	0.207668
2	no LF	0.183673
2	no LF	0.14
2	no LF	0.209059
2	no LF	0.217857
2	no LF	0.212544
2	no LF	0.204152
2	no LF	0.187898
2	no LF	0.198864
2	no LF	0.18541
2	no LF	0.207018
2	no LF	0.213523
2	no LF	0.215232
2	no LF	0.212544
2	no LF	0.203279
2	no LF
2	no LF	0.204778
2	no LF
2	no LF	0.128788
2	no LF	0.2
2	no LF	0.205298
2	no LF
2	no LF	0.169329
2	no LF
2	no LF	0.216301
2	no LF	0.181818
2	no LF
2	no LF	0.204698
2	no LF	0.217241
2	no LF	0.20339
2	no LF
2	no LF	0.142857
2	no LF	0.201954
2	no LF	0.183844
2	no LF
2	no LF	0.236074
2	no LF
2	no LF	0.204748
2	no LF	0.214058
2	no LF
2	no LF	0.210526
2	no LF
2	no LF	0.20073
2	no LF	0.200704
2	no LF	0.20462
2	no LF	0.145098
2	no LF	0.187266
2	no LF
2	no LF	0.123506
2	no LF	0.204152
2	no LF
2	no LF	0.214765
2	no LF	0.220339
2	no LF	0.208191
2	no LF	0.2
2	no LF	0.202797
2	no LF
2	no LF	0.188742
2	no LF	0.137097
2	no LF	0.204082
2	no LF	0.124542
2	no LF	0.116788
2	no LF	0.124542
2	no LF	0.133065
2	no LF
2	no LF	0.206642
2	no LF	0.201465
2	no LF
2	no LF	0.211488
2	no LF	0.196429
2	no LF	0.215054
2	no LF
2	no LF	0.190972
2	no LF	0.134146
2	no LF	0.189189
2	no LF	0.115523
2	no LF	0.136201
2	no LF	0.129412
2	no LF	0.199336
2	no LF	0.13253
2	no LF	0.179661
2	no LF	0.13253
2	no LF
2	no LF	0.19788
2	no LF	0.197324
2	no LF	0.189711
2	no LF	0.203279
2	no LF	0.199262
2	no LF	0.179577
2	no LF
2	no LF	0.196721
2	no LF	0.188854
2	no LF	0.140221
2	no LF	0.208054
2	no LF	0.200717
2	no LF	0.194346
2	no LF	0.184211
2	no LF	0.136364
2	no LF	0.194757
2	no LF	0.180556
2	no LF	0.103846
2	no LF	0.101215
2	no LF	0.115044
2	no LF	0.166023
2	no LF	0.105485
2	no LF	0.0916667
2	no LF	0.097166
2	no LF	0.112033
2	no LF	0.188679
2	no LF	0.19708
2	no LF	0.202952
2	no LF	0.194853
2	no LF	0.181507
2	no LF	0.118367
2	no LF	0.201465
2	no LF	0.195489
2	no LF	0.172161
2	no LF	0.0962343
2	no LF	0.191336
2	no LF	0.194245
2	no LF	0.197802
2	no LF	0.194946
2	no LF	0.190164
2	no LF	0.11811
2	no LF	0.191489
2	no LF	0.196491
2	no LF	0.2
2	no LF	0.204545
2	no LF
2	no LF	0.178182
2	no LF	0.105528
2	no LF	0.0398406
2	no LF	0.199301
2	no LF	0.101266
2	no LF	0.100719
2	no LF	0.124542
2	no LF	0.19281
2	no LF	0.200627
2	no LF	0.188854
2	no LF
2	no LF	0.167582
2	no LF	0.136364
2	no LF	0.125806
2	no LF	0.133987
2	no LF	0.113333
2	no LF	0.132353
2	no LF	0.174455
2	no LF	0.137931
2	no LF	0.15869
2	no LF
2	no LF	0.180952
2	no LF	0.114504
2	no LF	0.113445
2	no LF	0.0672269
2	no LF	0.107296
2	no LF	0.180451
2	no LF	0.186813
2	no LF	0.172881
2	no LF	0.11245
2	no LF	0.205674
2	no LF	0.193548
2	no LF	0.198582
2	no LF	0.194805
2	no LF	0.210702
2	no LF	0.210332
2	no LF	0.190647
2	no LF	0.292254
2	no LF
2	no LF	0.192308
2	no LF	0.191919
2	no LF	0.118852
2	no LF	0.169611
2	no LF	0.108871
2	no LF	0.182482
2	no LF	0.174658
2	no LF	0.110266
2	no LF	0.114625
2	no LF	0.187726
2	no LF	0.179661
2	no LF	0.104839
2	no LF	0.0859375
2	no LF	0.115538
2	no LF	0.208333
2	no LF	0.0758929
2	no LF	0.0944206
2	no LF	0.0837004
2	no LF	0.0905172
2	no LF	0.177778
2	no LF	0.105485
2	no LF	0.0781893
2	no LF	0.0966387
2	no LF	0.0869565
2	no LF	0.0806452
2	no LF	0.0791667
2	no LF	0.0891473
2	no LF	0.103004
2	no LF	0.197026
2	no LF	0.16955
2	no LF	0.114173
2	no LF	0.0963855
2	no LF	0.0946502
2	no LF	0.0923695
2	no LF	0.0938776
2	no LF	0.092827
2	no LF
2	no LF	0.158416
2	no LF	0.138643
2	no LF	0.224335
2	no LF	0.15534
2	no LF
2	no LF	0.126482
2	no LF	0.194268
2	no LF	0.21118
2	no LF	0.194611
2	no LF
2	no LF	0.256219
2	no LF	0.168901
2	no LF	0.228947
2	no LF
2	no LF	0.131902
2	no LF
2	no LF	0.170974
2	no LF	0.0734824
2	no LF	0.150442
2	no LF
2	no LF	0.201705
2	no LF
2	no LF	0.155673
2	no LF	0.180451
2	no LF	0.19382
2	no LF
2	no LF	0.200608
2	no LF	0.224684
2	no LF	0.199396
2	no LF
2	no LF	0.217791
2	no LF	0.221843
2	no LF	0.193772
2	no LF	0.20678
2	no LF	0.207237
2	no LF	0.213592
2	no LF	0.215434
2	no LF	0.203822
2	no LF
2	no LF	0.207237
2	no LF	0.207358
2	no LF	0.212121
2	no LF	0.204778
2	no LF	0.204013
2	no LF	0.21519
2	no LF
2	no RF	0.208661
2	no RF	0.190141
2	no RF	0.191558
2	no RF	0.187302
2	no RF	0.0990415
2	no RF	0.137931
2	no RF	0.1
2	no RF	0.0989761
2	no RF	0.189655
2	no RF	0.17608
2	no RF	0.0888158
2	no RF	0.197411
2	no RF	0.133127
2	no RF	0.203226
2	no RF	0.190635
2	no RF	0.17931
2	no RF	0.195286
2	no RF	0.198606
2	no RF	0.189831
2	no RF	0.192982
2	no RF	0.197917
2	no RF	0.19573
2	no RF	0.196667
2	no RF	0.21374
2	no RF	0.200692
2	no RF	0.203279
2	no RF	0.185304
2	no RF	0.185535
2	no RF	0.212454
2	no RF	0.195122
2	no RF	0.196296
2	no RF	0.199262
2	no RF	0.174825
2	no RF	0.190939
2	no RF	0.212928
2	no RF	0.171975
2	no RF	0.207407
2	no RF	0.212121
2	no RF	0.19544
2	no RF	0.215827
2	no RF
2	no RF	0.0996885
2	no RF	0.172524
2	no RF	0.0874636
2	no RF	0.204
2	no RF	0.191638
2	no RF	0.196429
2	no RF	0.195122
2	no RF	0.200692
2	no RF	0.184713
2	no RF	0.105114
2	no RF	0.109422
2	no RF	0.203509
2	no RF	0.192171
2	no RF	0.162252
2	no RF	0.191638
2	no RF	0.196721
2	no RF	0.197952
2	no RF	0.204778
2	no RF	0.181818
2	no RF	0.215909
2	no RF	0.186667
2	no RF	0.198675
2	no RF	0.15748
2	no RF	0.118211
2	no RF	0.204545
2	no RF	0.188088
2	no RF	0.0997067
2	no RF	0.107492
2	no RF	0.204698
2	no RF	0.203448
2	no RF	0.189831
2	no RF	0.159509
2	no RF	0.194139
2	no RF	0.188925
2	no RF	0.169916
2	no RF	0.10917
2	no RF	0.108753
2	no RF	0.143836
2	no RF	0.216617
2	no RF	0.201278
2	no RF
2	no RF	0.14386
2	no RF	0.0884354
2	no RF	0.193431
2	no RF	0.18662
2	no RF	0.178218
2	no RF	0.196078
2	no RF	0.194757
2	no RF	0.175325
2	no RF	0.191235
2	no RF	0.190311
2	no RF	0.174061
2	no RF	0.181208
2	no RF	0.128814
2	no RF	0.187713
2	no RF	0.175862
2	no RF	0.192308
2	no RF	0.188612
2	no RF	0.15894
2	no RF	0.197581
2	no RF	0.176871
2	no RF	0.194139
2	no RF	0.178832
2	no RF	0.175824
2	no RF	0.209677
2	no RF	0.18315
2	no RF	0.199262
2	no RF	0.190476
2	no RF	0.186441
2	no RF	0.104439
2	no RF	0.182143
2	no RF	0.18638
2	no RF	0.188192
2	no RF	0.177083
2	no RF	0.203252
2	no RF	0.179054
2	no RF	0.194946
2	no RF	0.207885
2	no RF	0.219608
2	no RF	0.169435
2	no RF	0.220884
2	no RF	0.179661
2	no RF	0.200803
2	no RF
2	no RF	0.166078
2	no RF	0.200669
2	no RF	0.0996785
2	no RF	0.193443
2	no RF	0.191882
2	no RF	0.179577
2	no RF	0.0993377
2	no RF	0.203279
2	no RF	0.130031
2	no RF	0.191882
2	no RF	0.100671
2	no RF	0.189964
2	no RF	0.194346
2	no RF	0.0921053
2	no RF	0.212121
2	no RF	0.183521
2	no RF	0.166667
2	no RF	0.169231
2	no RF	0.161943
2	no RF	0.185841
2	no RF	0.166023
2	no RF	0.168776
2	no RF	0.166667
2	no RF	0.165992
2	no RF	0.186722
2	no RF	0.181132
2	no RF	0.175182
2	no RF	0.184502
2	no RF	0.198529
2	no RF	0.174658
2	no RF	0.2
2	no RF	0.190476
2	no RF	0.184211
2	no RF	0.161172
2	no RF	0.188285
2	no RF	0.187726
2	no RF	0.201439
2	no RF	0.175824
2	no RF	0.202166
2	no RF	0.193443
2	no RF	0.216535
2	no RF	0.195035
2	no RF	0.175439
2	no RF	0.186441
2	no RF	0.0941558
2	no RF
2	no RF	0.0872727
2	no RF	0.125628
2	no RF	0.175299
2	no RF	0.13986
2	no RF	0.156118
2	no RF	0.179856
2	no RF	0.14652
2	no RF	0.186275
2	no RF	0.147335
2	no RF	0.19195
2	no RF	0.104294
2	no RF	0.10989
2	no RF	0.175758
2	no RF	0.212903
2	no RF	0.199346
2	no RF	0.203333
2	no RF	0.216912
2	no RF	0.174455
2	no RF	0.117241
2	no RF	0.153652
2	no RF	0.095082
2	no RF	0.187302
2	no RF	0.164122
2	no RF	0.0714286
2	no RF	0.142857
2	no RF	0.206009
2	no RF	0.18797
2	no RF	0.186813
2	no RF	0.176271
2	no RF	0.200803
2	no RF	0.166667
2	no RF	0.189964
2	no RF	0.166667
2	no RF	0.194805
2	no RF	0.19398
2	no RF	0.188192
2	no RF	0.190647
2	no RF	0.197183
2	no RF
2	no RF	0.195804
2	no RF	0.175084
2	no RF	0.184426
2	no RF	0.162544
2	no RF	0.189516
2	no RF	0.175182
2	no RF	0.160959
2	no RF	0.1673
2	no RF	0.193676
2	no RF	0.184116
2	no RF	0.169492
2	no RF	0.165323
2	no RF	0.164062
2	no RF	0.203187
2	no RF	0.0719697
2	no RF	0.160714
2	no RF	0.180258
2	no RF	0.0660793
2	no RF	0.198276
2	no RF	0.151852
2	no RF	0.147679
2	no RF	0.17284
2	no RF	0.163866
2	no RF	0.073913
2	no RF	0.181452
2	no RF	0.170833
2	no RF	0.189922
2	no RF	0.197425
2	no RF	0.152416
2	no RF	0.176471
2	no RF	0.0984252
2	no RF	0.180723
2	no RF	0.168724
2	no RF	0.172691
2	no RF	0.159184
2	no RF	0.160338
2	no RF
2	no RF	0.171617
2	no RF	0.159292
2	no RF	0.0988593
2	no RF	0.220065
2	no RF	0.123077
2	no RF	0.205534
2	no RF	0.105096
2	no RF	0.189441
2	no RF	0.176647
2	no RF	0.154054
2	no RF	0.164179
2	no RF	0.160858
2	no RF	0.126316
2	no RF	0.115044
2	no RF	0.147239
2	no RF	0.19898
2	no RF	0.0854871
2	no RF	0.105431
2	no RF	0.165192
2	no RF	0.130682
2	no RF	0.153409
2	no RF	0.151351
2	no RF	0.195251
2	no RF	0.197995
2	no RF	0.126404
2	no RF	0.144044
2	no RF	0.194529
2	no RF	0.186709
2	no RF	0.202417
2	no RF	0.115274
2	no RF	0.199387
2	no RF	0.116041
2	no RF	0.200692
2	no RF	0.210169
2	no RF	0.210526
2	no RF	0.197411
2	no RF	0.205788
2	no RF	0.216561
2	no RF	0.206452
2	no RF	0.203947
2	no RF	0.190635
2	no RF	0.198653
2	no RF	0.197952
2	no RF	0.19398
2	no RF	0.177215
2	no RF
2	no LH	0.216535
2	no LH	0.179577
2	no LH	0.185065
2	no LH	0.193651
2	no LH	0.198083
2	no LH	0.15674
2	no LH	0.217857
2	no LH	0.197952
2	no LH	0.168966
2	no LH	0.202658
2	no LH	0.200658
2	no LH	0.18123
2	no LH	0.213622
2	no LH	0.187097
2	no LH	0.183946
2	no LH	0.213793
2	no LH	0.191919
2	no LH	0.209059
2	no LH	0.183051
2	no LH	0.182456
2	no LH	0.190972
2	no LH	0.177936
2	no LH	0.16
2	no LH	0.194656
2	no LH	0.186851
2	no LH	0.193443
2	no LH	0.207668
2	no LH	0.163522
2	no LH	0.216117
2	no LH	0.163763
2	no LH	0.214815
2	no LH	0.173432
2	no LH	0.213287
2	no LH	0.200647
2	no LH	0.231939
2	no LH	0.171975
2	no LH	0.185185
2	no LH	0.191919
2	no LH	0.175896
2	no LH	0.18705
2	no LH
2	no LH	0.17134
2	no LH	0.217252
2	no LH	0.183673
2	no LH	0.228
2	no LH	0.181185
2	no LH	0.182143
2	no LH	0.184669
2	no LH	0.179931
2	no LH	0.219745
2	no LH	0.196023
2	no LH	0.206687
2	no LH	0.182456
2	no LH	0.199288
2	no LH	0.215232
2	no LH	0.195122
2	no LH	0.209836
2	no LH	0.1843
2	no LH	0.180887
2	no LH	0.162338
2	no LH	0.189394
2	no LH	0.19
2	no LH	0.182119
2	no LH	0.2021
2	no LH	0.236422
2	no LH	0.217532
2	no LH	0.194357
2	no LH	0.196481
2	no LH	0.14658
2	no LH	0.167785
2	no LH	0.182759
2	no LH	0.183051
2	no LH	0.162577
2	no LH	0.194139
2	no LH	0.18241
2	no LH	0.225627
2	no LH	0.299127
2	no LH	0.177719
2	no LH	0.257991
2	no LH	0.189911
2	no LH	0.191693
2	no LH
2	no LH	0.25614
2	no LH	0.14966
2	no LH	0.164234
2	no LH	0.183099
2	no LH	0.155116
2	no LH	0.160784
2	no LH	0.168539
2	no LH	0.165584
2	no LH	0.203187
2	no LH	0.17301
2	no LH	0.16041
2	no LH	0.177852
2	no LH	0.183051
2	no LH	0.170648
2	no LH	0.172414
2	no LH	0.171329
2	no LH	0.170819
2	no LH	0.155629
2	no LH	0.181452
2	no LH	0.085034
2	no LH	0.186813
2	no LH	0.145985
2	no LH	0.186813
2	no LH	0.173387
2	no LH	0.164835
2	no LH	0.158672
2	no LH	0.168498
2	no LH	0.2
2	no LH	0.138381
2	no LH	0.207143
2	no LH	0.18638
2	no LH	0.158672
2	no LH	0.138889
2	no LH	0.191057
2	no LH	0.141892
2	no LH	0.187726
2	no LH	0.154122
2	no LH	0.164706
2	no LH	0.156146
2	no LH	0.212851
2	no LH	0.155932
2	no LH	0.108434
2	no LH
2	no LH	0.236749
2	no LH	0.180602
2	no LH	0.202572
2	no LH	0.186885
2	no LH	0.180812
2	no LH	0.193662
2	no LH	0.172185
2	no LH	0.196721
2	no LH	0.176471
2	no LH	0.232472
2	no LH	0.144295
2	no LH	0.179211
2	no LH	0.201413
2	no LH	0.161184
2	no LH	0.185606
2	no LH	0.157303
2	no LH	0.138889
2	no LH	0.130769
2	no LH	0.182186
2	no LH	0.154867
2	no LH	0.119691
2	no LH	0.14346
2	no LH	0.15
2	no LH	0.133603
2	no LH	0.165975
2	no LH	0.166038
2	no LH	0.171533
2	no LH	0.158672
2	no LH	0.161765
2	no LH	0.150685
2	no LH	0.179592
2	no LH	0.161172
2	no LH	0.157895
2	no LH	0.168498
2	no LH	0.171548
2	no LH	0.184116
2	no LH	0.161871
2	no LH	0.186813
2	no LH	0.180505
2	no LH	0.170492
2	no LH	0.185039
2	no LH	0.166667
2	no LH	0.192982
2	no LH	0.183051
2	no LH	0.181818
2	no LH
2	no LH	0.127273
2	no LH	0.0904523
2	no LH	0.258964
2	no LH	0.143357
2	no LH	0.177215
2	no LH	0.179856
2	no LH	0.241758
2	no LH	0.202614
2	no LH	0.172414
2	no LH	0.216718
2	no LH	0.190184
2	no LH	0.200549
2	no LH	0.172727
2	no LH	0.209677
2	no LH	0.166667
2	no LH	0.176667
2	no LH	0.205882
2	no LH	0.190031
2	no LH	0.196552
2	no LH	0.261965
2	no LH	0.144262
2	no LH	0.136508
2	no LH	0.152672
2	no LH	0.113445
2	no LH	0.155462
2	no LH	0.184549
2	no LH	0.165414
2	no LH	0.161172
2	no LH	0.142373
2	no LH	0.184739
2	no LH	0.148936
2	no LH	0.164875
2	no LH	0.187943
2	no LH	0.159091
2	no LH	0.150502
2	no LH	0.147601
2	no LH	0.190647
2	no LH	0.165493
2	no LH
2	no LH	0.167832
2	no LH	0.144781
2	no LH	0.159836
2	no LH	0.155477
2	no LH	0.189516
2	no LH	0.171533
2	no LH	0.167808
2	no LH	0.171103
2	no LH	0.209486
2	no LH	0.180505
2	no LH	0.155932
2	no LH	0.141129
2	no LH	0.152344
2	no LH	0.183267
2	no LH	0.0681818
2	no LH	0.147321
2	no LH	0.133047
2	no LH	0.123348
2	no LH	0.159483
2	no LH	0.133333
2	no LH	0.126582
2	no LH	0.139918
2	no LH	0.105042
2	no LH	0.143478
2	no LH	0.133065
2	no LH	0.158333
2	no LH	0.143411
2	no LH	0.184549
2	no LH	0.178439
2	no LH	0.16263
2	no LH	0.137795
2	no LH	0.148594
2	no LH	0.135802
2	no LH	0.15261
2	no LH	0.159184
2	no LH	0.126582
2	no LH
2	no LH	0.125413
2	no LH	0.218289
2	no LH	0.152091
2	no LH	0.23301
2	no LH	0.147692
2	no LH	0.189723
2	no LH	0.175159
2	no LH	0.208075
2	no LH	0.200599
2	no LH	0.237838
2	no LH	0.231343
2	no LH	0.252011
2	no LH	0.226316
2	no LH	0.171091
2	no LH	0.266871
2	no LH	0.219388
2	no LH	0.0934394
2	no LH	0.249201
2	no LH	0.230088
2	no LH	0.213068
2	no LH	0.227273
2	no LH	0.210811
2	no LH	0.245383
2	no LH	0.235589
2	no LH	0.210674
2	no LH	0.221607
2	no LH	0.18541
2	no LH	0.196203
2	no LH	0.220544
2	no LH	0.210375
2	no LH	0.165644
2	no LH	0.150171
2	no LH	0.16955
2	no LH	0.166102
2	no LH	0.177632
2	no LH	0.174757
2	no LH	0.154341
2	no LH	0.200637
2	no LH	0.190323
2	no LH	0.171053
2	no LH	0.207358
2	no LH	0.178451
2	no LH	0.177474
2	no LH	0.220736
2	no LH	0.208861
2	no LH
2	no RH	0.181102
2	no RH	0.183099
2	no RH	0.185065
2	no RH	0.206349
2	no RH	0.207668
2	no RH	0.197492
2	no RH	0.246429
2	no RH	0.191126
2	no RH	0.189655
2	no RH	0.189369
2	no RH	0.213816
2	no RH	0.184466
2	no RH	0.232198
2	no RH	0.212903
2	no RH	0.197324
2	no RH	0.17931
2	no RH	0.195286
2	no RH	0.188153
2	no RH	0.227119
2	no RH	0.221053
2	no RH	0.222222
2	no RH	0.192171
2	no RH	0.21
2	no RH	0.232824
2	no RH	0.190311
2	no RH	0.180328
2	no RH	0.185304
2	no RH	0.179245
2	no RH	0.216117
2	no RH	0.202091
2	no RH	0.214815
2	no RH	0.173432
2	no RH	0.167832
2	no RH	0.216828
2	no RH	0.171103
2	no RH	0.159236
2	no RH	0.207407
2	no RH	0.181818
2	no RH	0.179153
2	no RH	0.219424
2	no RH
2	no RH	0.211838
2	no RH	0.191693
2	no RH	0.183673
2	no RH	0.228
2	no RH	0.195122
2	no RH	0.164286
2	no RH	0.191638
2	no RH	0.190311
2	no RH	0.184713
2	no RH	0.323864
2	no RH	0.176292
2	no RH	0.17193
2	no RH	0.192171
2	no RH	0.195364
2	no RH	0.216028
2	no RH	0.236066
2	no RH	0.232082
2	no RH	0.221843
2	no RH	0.168831
2	no RH	0.204545
2	no RH	0.2
2	no RH	0.18543
2	no RH	0.188976
2	no RH	0.303514
2	no RH	0.198052
2	no RH	0.219436
2	no RH	0.243402
2	no RH	0.214984
2	no RH	0.211409
2	no RH	0.203448
2	no RH	0.172881
2	no RH	0.190184
2	no RH	0.208791
2	no RH	0.192182
2	no RH	0.208914
2	no RH	0.242358
2	no RH	0.259947
2	no RH	0.216895
2	no RH	0.27003
2	no RH	0.210863
2	no RH
2	no RH	0.168421
2	no RH	0.221088
2	no RH	0.167883
2	no RH	0.197183
2	no RH	0.171617
2	no RH	0.203922
2	no RH	0.183521
2	no RH	0.181818
2	no RH	0.191235
2	no RH	0.193772
2	no RH	0.180887
2	no RH	0.167785
2	no RH	0.189831
2	no RH	0.194539
2	no RH	0.17931
2	no RH	0.164336
2	no RH	0.153025
2	no RH	0.152318
2	no RH	0.173387
2	no RH	0.146259
2	no RH	0.168498
2	no RH	0.186131
2	no RH	0.179487
2	no RH	0.181452
2	no RH	0.179487
2	no RH	0.177122
2	no RH	0.168498
2	no RH	0.179661
2	no RH	0.289817
2	no RH	0.225
2	no RH	0.204301
2	no RH	0.217712
2	no RH	0.15625
2	no RH	0.186992
2	no RH	0.165541
2	no RH	0.194946
2	no RH	0.168459
2	no RH	0.211765
2	no RH	0.199336
2	no RH	0.196787
2	no RH	0.172881
2	no RH	0.184739
2	no RH
2	no RH	0.265018
2	no RH	0.230769
2	no RH	0.266881
2	no RH	0.232787
2	no RH	0.214022
2	no RH	0.207746
2	no RH	0.198675
2	no RH	0.22623
2	no RH	0.185759
2	no RH	0.225092
2	no RH	0.238255
2	no RH	0.189964
2	no RH	0.212014
2	no RH	0.207237
2	no RH	0.238636
2	no RH	0.213483
2	no RH	0.197917
2	no RH	0.207692
2	no RH	0.210526
2	no RH	0.216814
2	no RH	0.181467
2	no RH	0.194093
2	no RH	0.2
2	no RH	0.194332
2	no RH	0.219917
2	no RH	0.169811
2	no RH	0.211679
2	no RH	0.225092
2	no RH	0.183824
2	no RH	0.205479
2	no RH	0.228571
2	no RH	0.18315
2	no RH	0.221805
2	no RH	0.14652
2	no RH	0.192469
2	no RH	0.212996
2	no RH	0.219424
2	no RH	0.194139
2	no RH	0.227437
2	no RH	0.216393
2	no RH	0.224409
2	no RH	0.180851
2	no RH	0.210526
2	no RH	0.230508
2	no RH	0.188312
2	no RH
2	no RH	0.192727
2	no RH	0.120603
2	no RH	0.155378
2	no RH	0.171329
2	no RH	0.164557
2	no RH	0.169065
2	no RH	0.227106
2	no RH	0.186275
2	no RH	0.253918
2	no RH	0.232198
2	no RH	0.239264
2	no RH	0.211538
2	no RH	0.206061
2	no RH	0.23871
2	no RH	0.199346
2	no RH	0.233333
2	no RH	0.235294
2	no RH	0.202492
2	no RH	0.258621
2	no RH	0.236776
2	no RH	0.2
2	no RH	0.209524
2	no RH	0.206107
2	no RH	0.226891
2	no RH	0.184874
2	no RH	0.227468
2	no RH	0.203008
2	no RH	0.205128
2	no RH	0.19661
2	no RH	0.228916
2	no RH	0.159574
2	no RH	0.225806
2	no RH	0.187943
2	no RH	0.194805
2	no RH	0.234114
2	no RH	0.191882
2	no RH	0.21223
2	no RH
2	no RH
2	no RH	0.188811
2	no RH	0.212121
2	no RH	0.245902
2	no RH	0.166078
2	no RH	0.221774
2	no RH	0.178832
2	no RH	0.184932
2	no RH	0.197719
2	no RH	0.181818
2	no RH	0.202166
2	no RH	0.166102
2	no RH	0.197581
2	no RH	0.164062
2	no RH	0.223108
2	no RH	0.19697
2	no RH	0.125
2	no RH	0.124464
2	no RH	0.140969
2	no RH	0.193966
2	no RH	0.155556
2	no RH	0.198312
2	no RH	0.139918
2	no RH	0.205882
2	no RH	0.134783
2	no RH	0.173387
2	no RH	0.141667
2	no RH	0.174419
2	no RH	0.23176
2	no RH	0.211896
2	no RH	0.200692
2	no RH	0.228346
2	no RH	0.212851
2	no RH	0.168724
2	no RH	0.148594
2	no RH	0.163265
2	no RH	0.160338
2	no RH
2	no RH	0.158416
2	no RH	0.300885
2	no RH	0.144487
2	no RH	0.239482
2	no RH	0.215385
2	no RH	0.233202
2	no RH	0.254777
2	no RH	0.18323
2	no RH	0.200599
2	no RH	0.267568
2	no RH	0.251244
2	no RH	0.238606
2	no RH	0.297368
2	no RH	0.230088
2	no RH	0.266871
2	no RH	0.255102
2	no RH	0.228628
2	no RH	0.217252
2	no RH	0.241888
2	no RH	0.264205
2	no RH	0.247159
2	no RH	0.197297
2	no RH	0.311346
2	no RH	0.180451
2	no RH	0.320225
2	no RH	0.268698
2	no RH	0.246201
2	no RH	0.253165
2	no RH	0.238671
2	no RH	0.247839
2	no RH	0.248466
2	no RH	0.197952
2	no RH	0.235294
2	no RH	0.186441
2	no RH	0.203947
2	no RH	0.20712
2	no RH	0.247588
2	no RH	0.248408
2	no RH	0.23871
2	no RH	0.223684
2	no RH	0.230769
2	no RH	0.228956
2	no RH	0.21843
2	no RH	0.227425
2	no RH	0.21519
2	no RH
3	no LF	0.205479
3	no LF	0.210938
3	no LF	0.234818
3	no LF	0.201521
3	no LF	0.149573
3	no LF	0.207407
3	no LF	0.13834
3	no LF	0.173585
3	no LF	0.129707
3	no LF	0.137339
3	no LF	0.124464
3	no LF	0.127854
3	no LF	0.113208
3	no LF	0.100478
3	no LF	0.103286
3	no LF	0.116279
3	no LF	0.121495
3	no LF	0.110092
3	no LF	0.11215
3	no LF	0.105505
3	no LF	0.10917
3	no LF	0.122172
3	no LF	0.115741
3	no LF	0.133333
3	no LF	0.117647
3	no LF	0.116822
3	no LF	0.115942
3	no LF	0.101382
3	no LF	0.114754
3	no LF	0.161943
3	no LF	0.135747
3	no LF	0.125
3	no LF	0.121739
3	no LF	0.121212
3	no LF	0.139013
3	no LF	0.170996
3	no LF	0.136882
3	no LF	0.11336
3	no LF	0.140426
3	no LF	0.123894
3	no LF	0.114625
3	no LF	0.145522
3	no LF
3	no LF	0.143443
3	no LF	0.208494
3	no LF	0.199262
3	no LF	0.128
3	no LF	0.119266
3	no LF	0.187023
3	no LF	0.129921
3	no LF	0.143443
3	no LF	0.208571
3	no LF	0.142857
3	no LF	0.172535
3	no LF	0.229965
3	no LF	0.216312
3	no LF	0.155894
3	no LF	0.197761
3	no LF	0.131579
3	no LF	0.113636
3	no LF	0.111588
3	no LF	0.128
3	no LF	0.116981
3	no LF	0.183432
3	no LF
3	no LF	0.266169
3	no LF	0.224806
3	no LF	0.178125
3	no LF	0.212996
3	no LF	0.124464
3	no LF	0.12069
3	no LF	0.127119
3	no LF	0.134694
3	no LF	0.128
3	no LF	0.13834
3	no LF
3	no LF	0.20082
3	no LF	0.119048
3	no LF	0.125
3	no LF	0.109005
3	no LF	0.104072
3	no LF	0.114679
3	no LF	0.119266
3	no LF	0.116822
3	no LF	0.109005
3	no LF	0.10396
3	no LF	0.0954774
3	no LF	0.1
3	no LF	0.107981
3	no LF	0.114155
3	no LF	0.113122
3	no LF	0.119816
3	no LF	0.119048
3	no LF	0.117647
3	no LF	0.106796
3	no LF	0.102941
3	no LF	0.107143
3	no LF	0.0964467
3	no LF	0.101942
3	no LF	0.111628
3	no LF	0.119266
3	no LF	0.118421
3	no LF	0.124481
3	no LF	0.134259
3	no LF	0.113208
3	no LF	0.112676
3	no LF	0.111628
3	no LF	0.113744
3	no LF	0.113744
3	no LF	0.11215
3	no LF	0.108108
3	no LF	0.121739
3	no LF
3	no LF	0.251701
3	no LF	0.224409
3	no LF	0.222222
3	no LF	0.195489
3	no LF	0.127329
3	no LF	0.187773
3	no LF	0.192469
3	no LF	0.114679
3	no LF	0.117371
3	no LF	0.115741
3	no LF	0.113445
3	no LF	0.142276
3	no LF	0.104651
3	no LF	0.114035
3	no LF	0.178832
3	no LF
3	no LF	0.147601
3	no LF	0.163121
3	no LF	0.14433
3	no LF	0.0744681
3	no LF	0.0892019
3	no LF	0.102564
3	no LF	0.12963
3	no LF	0.132296
3	no LF	0.144509
3	no LF	0.213768
3	no LF
3	no RF	0.273973
3	no RF	0.234375
3	no RF	0.226721
3	no RF	0.21673
3	no RF	0.252137
3	no RF	0.151852
3	no RF	0.237154
3	no RF	0.222642
3	no RF	0.209205
3	no RF	0.128755
3	no RF	0.133047
3	no RF	0.136986
3	no RF	0.127358
3	no RF	0.119617
3	no RF	0.126761
3	no RF	0.130233
3	no RF	0.130841
3	no RF	0.133028
3	no RF	0.130841
3	no RF	0.137615
3	no RF	0.135371
3	no RF	0.144796
3	no RF	0.138889
3	no RF	0.137778
3	no RF	0.126697
3	no RF	0.121495
3	no RF	0.120773
3	no RF	0.124424
3	no RF	0.135246
3	no RF	0.149798
3	no RF	0.135747
3	no RF	0.133929
3	no RF	0.13913
3	no RF	0.142857
3	no RF	0.156951
3	no RF	0.175325
3	no RF	0.247148
3	no RF	0.1417
3	no RF	0.12766
3	no RF	0.141593
3	no RF	0.15415
3	no RF	0.13806
3	no RF
3	no RF	0.25
3	no RF	0.243243
3	no RF	0.206642
3	no RF	0.124
3	no RF	0.243119
3	no RF	0.141221
3	no RF	0.220472
3	no RF	0.25
3	no RF	0.225714
3	no RF	0.247899
3	no RF	0.151408
3	no RF	0.163763
3	no RF	0.219858
3	no RF	0.247148
3	no RF	0.13806
3	no RF	0.131579
3	no RF	0.127273
3	no RF	0.128755
3	no RF	0.14
3	no RF	0.139623
3	no RF	0.159763
3	no RF	0.157518
3	no RF	0.18408
3	no RF	0.112403
3	no RF	0.23125
3	no RF	0.151625
3	no RF	0.128755
3	no RF	0.137931
3	no RF	0.135593
3	no RF	0.138776
3	no RF	0.14
3	no RF	0.142292
3	no RF
3	no RF	0.147541
3	no RF	0.142857
3	no RF	0.115385
3	no RF	0.127962
3	no RF	0.126697
3	no RF	0.12844
3	no RF	0.123853
3	no RF	0.126168
3	no RF	0.123223
3	no RF	0.118812
3	no RF	0.105528
3	no RF	0.114286
3	no RF	0.131455
3	no RF	0.127854
3	no RF	0.131222
3	no RF	0.129032
3	no RF	0.128571
3	no RF	0.122549
3	no RF	0.116505
3	no RF	0.122549
3	no RF	0.122449
3	no RF	0.111675
3	no RF	0.121359
3	no RF	0.125581
3	no RF	0.137615
3	no RF	0.131579
3	no RF	0.145228
3	no RF	0.12963
3	no RF	0.132075
3	no RF	0.122066
3	no RF	0.130233
3	no RF	0.123223
3	no RF	0.123223
3	no RF	0.130841
3	no RF	0.121622
3	no RF	0.143478
3	no RF
3	no RF	0.166667
3	no RF	0.133858
3	no RF	0.213992
3	no RF	0.195489
3	no RF	0.226708
3	no RF	0.117904
3	no RF	0.125523
3	no RF	0.12844
3	no RF	0.131455
3	no RF	0.115741
3	no RF	0.113445
3	no RF	0.138211
3	no RF	0.151163
3	no RF	0.187135
3	no RF	0.222628
3	no RF	0.201413
3	no RF	0.166052
3	no RF	0.163121
3	no RF	0.103093
3	no RF	0.202128
3	no RF	0.117371
3	no RF	0.128205
3	no RF	0.155556
3	no RF	0.136187
3	no RF	0.265896
3	no RF	0.206522
3	no RF
3	no LH	0.191781
3	no LH	0.199219
3	no LH	0.165992
3	no LH	0.155894
3	no LH	0.205128
3	no LH	0.144444
3	no LH	0.237154
3	no LH	0.139623
3	no LH	0.158996
3	no LH	0.171674
3	no LH	0.171674
3	no LH	0.150685
3	no LH	0.15566
3	no LH	0.129187
3	no LH	0.164319
3	no LH	0.167442
3	no LH	0.154206
3	no LH	0.155963
3	no LH	0.130841
3	no LH	0.16055
3	no LH	0.144105
3	no LH	0.135747
3	no LH	0.143519
3	no LH	0.177778
3	no LH	0.162896
3	no LH	0.158879
3	no LH	0.130435
3	no LH	0.175115
3	no LH	0.172131
3	no LH	0.161943
3	no LH	0.158371
3	no LH	0.151786
3	no LH	0.143478
3	no LH	0.194805
3	no LH	0.215247
3	no LH	0.151515
3	no LH	0.159696
3	no LH	0.194332
3	no LH	0.144681
3	no LH	0.154867
3	no LH	0.162055
3	no LH	0.227612
3	no LH
3	no LH	0.172131
3	no LH	0.166023
3	no LH	0.173432
3	no LH	0.16
3	no LH	0.192661
3	no LH	0.175573
3	no LH	0.169291
3	no LH	0.20082
3	no LH	0.154286
3	no LH	0.176471
3	no LH	0.235915
3	no LH	0.174216
3	no LH	0.152482
3	no LH	0.193916
3	no LH	0.156716
3	no LH	0.162281
3	no LH	0.163636
3	no LH	0.171674
3	no LH	0.176
3	no LH	0.275472
3	no LH	0.33432
3	no LH	0.207637
3	no LH	0.139303
3	no LH	0.205426
3	no LH	0.2125
3	no LH	0.166065
3	no LH	0.175966
3	no LH	0.176724
3	no LH	0.182203
3	no LH	0.17551
3	no LH	0.18
3	no LH	0.16996
3	no LH
3	no LH	0.122951
3	no LH	0.190476
3	no LH	0.158654
3	no LH	0.151659
3	no LH	0.149321
3	no LH	0.155963
3	no LH	0.16055
3	no LH	0.130841
3	no LH	0.14218
3	no LH	0.138614
3	no LH	0.120603
3	no LH	0.133333
3	no LH	0.14554
3	no LH	0.136986
3	no LH	0.158371
3	no LH	0.152074
3	no LH	0.12381
3	no LH	0.132353
3	no LH	0.116505
3	no LH	0.156863
3	no LH	0.112245
3	no LH	0.147208
3	no LH	0.150485
3	no LH	0.125581
3	no LH	0.16055
3	no LH	0.157895
3	no LH	0.136929
3	no LH	0.157407
3	no LH	0.127358
3	no LH	0.140845
3	no LH	0.106977
3	no LH	0.113744
3	no LH	0.118483
3	no LH	0.149533
3	no LH	0.175676
3	no LH	0.173913
3	no LH
3	no LH	0.173469
3	no LH	0.185039
3	no LH	0.168724
3	no LH	0.169173
3	no LH	0.145963
3	no LH	0.170306
3	no LH	0.171548
3	no LH	0.16055
3	no LH	0.164319
3	no LH	0.148148
3	no LH	0.210084
3	no LH	0.162602
3	no LH	0.213178
3	no LH	0.30117
3	no LH	0.142336
3	no LH	0.194346
3	no LH	0.199262
3	no LH	0.152482
3	no LH	0.0876289
3	no LH	0.159574
3	no LH	0.164319
3	no LH	0.153846
3	no LH	0.155556
3	no LH	0.163424
3	no LH	0.213873
3	no LH	0.25
3	no LH
3	no RH	0.164384
3	no RH	0.105469
3	no RH	0.165992
3	no RH	0.163498
3	no RH	0.162393
3	no RH	0.155556
3	no RH	0.146245
3	no RH	0.139623
3	no RH	0.138075
3	no RH	0.158798
3	no RH	0.150215
3	no RH	0.164384
3	no RH	0.141509
3	no RH	0.129187
3	no RH	0.122066
3	no RH	0.12093
3	no RH	0.14486
3	no RH	0.087156
3	no RH	0.135514
[truncated: 11,813 more rows]
